# Supplementary material for: Interactions at heterointerfaces influence actuation in wet cast 1T-MoS 2 and V 2 O 5 ·0.5H 2 O thin films
Source: Royal Society of Chemistry journal article supplement (doi:10.1039/d5ta02659h), 2025-01-01
Supplement: d5ta02659h1.xlsx [file d5ta02659h1.xlsx]

## Sheet: 1T-MoS2-framedata
time	current	voltage	curvature
-4.06	0.0203189	7.82418e-05	0.0457059
-4.02	0.0203189	7.82418e-05	0.0440913
-3.98	0.0203189	7.82418e-05	0.0447068
-3.94	0.0203189	7.82418e-05	0.0448428
-3.89	0.0203189	7.82418e-05	0.042852
-3.84	0.0203189	7.82418e-05	0.0450928
-3.81	0.0203189	7.82418e-05	0.0445712
-3.77	0.0203189	7.82418e-05	0.0433272
-3.72	0.0203189	7.82418e-05	0.0425915
-3.67	0.0203189	7.82418e-05	0.0438094
-3.64	0.0203189	7.82418e-05	0.0455765
-3.59	0.0203189	7.82418e-05	0.0443222
-3.55	0.0203189	7.82418e-05	0.0437493
-3.52	0.0203189	7.82418e-05	0.0453769
-3.47	0.0203189	7.82418e-05	0.0441713
-3.42	0.0203189	7.82418e-05	0.0429126
-3.38	0.0203189	7.82418e-05	0.0448836
-3.34	0.0203189	7.82418e-05	0.0468471
-3.3	0.0203189	7.82418e-05	0.0458472
-3.25	0.0203189	7.82418e-05	0.0443028
-3.2	0.0203189	7.82418e-05	0.0414519
-3.17	0.0203189	7.82418e-05	0.0428655
-3.13	0.0203189	7.82418e-05	0.0448352
-3.08	0.0203189	7.82418e-05	0.0439437
-3.05	0.0203189	7.82418e-05	0.0468068
-3	0.0203189	7.82418e-05	0.0419573
-2.95	0.0203189	7.82418e-05	0.0434417
-2.91	0.0203189	7.82418e-05	0.0439346
-2.88	0.0203189	7.82418e-05	0.043229
-2.83	0.0203189	7.82418e-05	0.0438518
-2.78	0.0203189	7.82418e-05	0.042614
-2.75	0.0203189	7.82418e-05	0.0427126
-2.7	0.0203189	7.82418e-05	0.0452009
-2.66	0.0203189	7.82418e-05	0.0409476
-2.61	0.0203189	7.82418e-05	0.0445096
-2.58	0.0203189	7.82418e-05	0.0425997
-2.53	0.0203189	7.82418e-05	0.0431834
-2.48	0.0203189	7.82418e-05	0.0425856
-2.45	0.0203189	7.82418e-05	0.044955
-2.41	0.0203189	7.82418e-05	0.0445932
-2.36	0.0203189	7.82418e-05	0.043427
-2.31	0.0203189	7.82418e-05	0.0436174
-2.28	0.0203189	7.82418e-05	0.0442344
-2.23	0.0203189	7.82418e-05	0.043349
-2.19	0.0203189	7.82418e-05	0.0458248
-2.16	0.0203189	7.82418e-05	0.0439392
-2.11	0.0203189	7.82418e-05	0.0430876
-2.06	0.0203189	7.82418e-05	0.0451137
-2.02	0.0203189	7.82418e-05	0.0456809
-1.98	0.0203189	7.82418e-05	0.043662
-1.94	0.0203189	7.82418e-05	0.0455438
-1.89	0.0203189	7.82418e-05	0.0411184
-1.84	0.0203189	7.82418e-05	0.0434781
-1.81	0.0203189	7.82418e-05	0.0417458
-1.77	0.0203189	7.82418e-05	0.0435255
-1.72	0.0203189	7.82418e-05	0.0470155
-1.67	0.0203189	7.82418e-05	0.0438101
-1.64	0.0203189	7.82418e-05	0.0437487
-1.59	0.0203189	7.82418e-05	0.0420394
-1.55	0.0203189	7.82418e-05	0.0446127
-1.5	0.0203189	7.82418e-05	0.0445167
-1.47	0.0203189	7.82418e-05	0.0443067
-1.42	0.0203189	7.82418e-05	0.0437145
-1.38	0.0203189	7.82418e-05	0.045008
-1.34	0.0203189	7.82418e-05	0.043936
-1.3	0.0203189	7.82418e-05	0.0471235
-1.25	0.0203189	7.82418e-05	0.0439723
-1.2	0.0203189	7.82418e-05	0.04271
-1.17	0.0203189	7.82418e-05	0.0421884
-1.13	0.0203189	7.82418e-05	0.0429064
-1.08	0.0203189	7.82418e-05	0.0471808
-1.04	0.0203189	7.82418e-05	0.0410619
-0.99	0.0203189	7.82418e-05	0.0427046
-0.95	0.0203189	7.82418e-05	0.043141
-0.91	0.0203189	7.82418e-05	0.0430469
-0.87	0.0203189	7.82418e-05	0.0443438
-0.82	0.0203189	7.82418e-05	0.0468889
-0.78	0.0203189	7.82418e-05	0.0419692
-0.74	0.0203189	7.82418e-05	0.0446359
-0.7	0.0203189	7.82418e-05	0.0439337
-0.65	0.0203189	7.82418e-05	0.0415026
-0.61	0.0203189	7.82418e-05	0.0451925
-0.57	0.0203189	7.82418e-05	0.0436046
-0.52	0.0203189	7.82418e-05	0.0431128
-0.48	0.0203189	7.82418e-05	0.0421438
-0.44	0.0203189	7.82418e-05	0.0441253
-0.4	0.0203189	7.82418e-05	0.0450244
-0.35	0.0203189	7.82418e-05	0.0417504
-0.31	0.0203189	7.82418e-05	0.0436277
-0.27	0.0203189	7.82418e-05	0.0417508
-0.23	0.0203189	7.82418e-05	0.0424807
-0.19	0.0203189	7.82418e-05	0.0444364
-0.14	0.0203189	7.82418e-05	0.0411362
-0.1	0.0203189	7.82418e-05	0.0443238
-0.06	0.0203189	7.82418e-05	0.042933
-0.01	0.0203189	7.82418e-05	0.0436823
0.03	0.0203189	7.82418e-05	0.0447791
0.07	0.0203189	7.82418e-05	0.04188
0.11	0.0203189	7.82418e-05	0.0478505
0.16	0.0203189	7.82418e-05	0.0430651
0.2	0.0203189	7.82418e-05	0.0423112
0.24	0.0203189	7.82418e-05	0.0417582
0.28	0.0203189	7.82418e-05	0.0452569
0.32	0.0203189	7.82418e-05	0.0458774
0.37	0.0203189	7.82418e-05	0.0447389
0.41	0.0203189	7.82418e-05	0.0455748
0.44	0.0203189	7.82418e-05	0.0448049
0.49	0.0203189	7.82418e-05	0.045377
0.54	0.0203189	7.82418e-05	0.0465262
0.58	0.0203189	7.82418e-05	0.0436708
0.61	0.0203189	7.82418e-05	0.0466546
0.67	0.0203189	7.82418e-05	0.0453369
0.71	0.0203189	7.82418e-05	0.0444162
0.74	0.0203189	7.82418e-05	0.04317
0.79	0.0203189	7.82418e-05	0.0459843
0.83	0.0203189	7.82418e-05	0.0461247
0.88	0.0203189	7.82418e-05	0.0470852
0.91	0.0203189	7.82418e-05	0.0447681
0.96	0.0203189	7.82418e-05	0.0416882
1.01	0.0203189	7.82418e-05	0.0463667
1.04	0.0203189	7.82418e-05	0.0433078
1.08	0.0203189	7.82418e-05	0.045568
1.13	0.0203189	7.82418e-05	0.044441
1.18	0.0203189	7.82418e-05	0.044964
1.21	0.0203189	7.82418e-05	0.0456177
1.26	0.0203189	7.82418e-05	0.0443453
1.3	0.0203189	7.82418e-05	0.0466856
1.34	0.0203189	7.82418e-05	0.046002
1.38	0.0203189	7.82418e-05	0.0452704
1.43	0.0203189	7.82418e-05	0.0469015
1.48	0.0203189	7.82418e-05	0.0447854
1.51	0.0203189	7.82418e-05	0.0423
1.55	0.0203189	7.82418e-05	0.0448797
1.6	0.0203189	7.82418e-05	0.0428215
1.63	0.0203189	7.82418e-05	0.0439206
1.68	0.0203189	7.82418e-05	0.0425534
1.73	0.0203189	7.82418e-05	0.0415905
1.77	0.0203189	7.82418e-05	0.0427543
1.81	0.0203189	7.82418e-05	0.0437112
1.85	0.0203189	7.82418e-05	0.0456433
1.9	0.0203189	7.82418e-05	0.0443513
1.93	0.0203189	7.82418e-05	0.0435319
1.98	0.0203189	7.82418e-05	0.0432768
2.03	0.0203189	7.82418e-05	0.0432631
2.06	0.0203189	7.82418e-05	0.0427653
2.1	0.0203189	7.82418e-05	0.0474419
2.15	0.0203189	7.82418e-05	0.0440867
2.2	0.0203189	7.82418e-05	0.0439487
2.23	0.0203189	7.82418e-05	0.0429851
2.28	0.0203189	7.82418e-05	0.0421511
2.32	0.0203189	7.82418e-05	0.0446738
2.36	0.0203189	7.82418e-05	0.0438323
2.4	0.0203189	7.82418e-05	0.0435295
2.45	0.0203189	7.82418e-05	0.0447118
2.5	0.0203189	7.82418e-05	0.0421231
2.53	0.0203189	7.82418e-05	0.0473506
2.58	0.0203189	7.82418e-05	0.0453079
2.62	0.0203189	7.82418e-05	0.0457179
2.65	0.0203189	7.82418e-05	0.0439265
2.7	0.0203189	7.82418e-05	0.043739
2.75	0.0203189	7.82418e-05	0.0448097
2.78	0.0203189	7.82418e-05	0.0426769
2.83	0.0203189	7.82418e-05	0.0419352
2.88	0.0203189	7.82418e-05	0.0448436
2.92	0.0203189	7.82418e-05	0.0446401
2.95	0.0203189	7.82418e-05	0.0425727
3	0.0203189	7.82418e-05	0.0442364
3.05	0.0203189	7.82418e-05	0.0429065
3.09	0.0203189	7.82418e-05	0.0428979
3.13	0.0203189	7.82418e-05	0.043987
3.18	0.0203189	7.82418e-05	0.0457358
3.22	0.0203189	7.82418e-05	0.0432188
3.25	0.0203189	7.82418e-05	0.0423107
3.3	0.0203189	7.82418e-05	0.0430511
3.34	0.0203189	7.82418e-05	0.0425923
3.38	0.0203189	7.82418e-05	0.0453627
3.42	0.0203189	7.82418e-05	0.0454885
3.47	0.0203189	7.82418e-05	0.045196
3.52	0.0203189	7.82418e-05	0.0445692
3.55	0.0203189	7.82418e-05	0.0459684
3.6	0.0203189	7.82418e-05	0.0464539
3.64	0.0203189	7.82418e-05	0.0489136
3.68	0.0203189	7.82418e-05	0.0493206
3.72	0.0203189	7.82418e-05	0.0467811
3.77	0.0203189	7.82418e-05	0.0495689
3.82	0.0203189	7.82418e-05	0.0495709
3.85	0.0203189	7.82418e-05	0.0485322
3.89	0.0203189	7.82418e-05	0.0521887
3.94	0.0203189	7.82418e-05	0.0496906
3.98	0.0203189	7.82418e-05	0.0490723
4.02	0.0203189	7.82418e-05	0.0506127
4.07	0.0203189	7.82418e-05	0.0487719
4.11	0.0203189	7.82418e-05	0.0506184
4.15	0.0203189	7.82418e-05	0.0497401
4.19	0.0203189	7.82418e-05	0.0486795
4.24	0.0203189	7.82418e-05	0.0490641
4.28	0.0203189	7.82418e-05	0.0491196
4.32	0.0203189	7.82418e-05	0.0492344
4.36	0.0203189	7.82418e-05	0.0522879
4.41	0.0203189	7.82418e-05	0.0497978
4.44	0.0203189	7.82418e-05	0.0494527
4.49	0.0203189	7.82418e-05	0.0473685
4.54	0.0203189	7.82418e-05	0.0509663
4.58	0.0203189	7.82418e-05	0.0501755
4.62	0.0203189	7.82418e-05	0.0502976
4.66	0.0203189	7.82418e-05	0.0498607
4.69	0.0203189	7.82418e-05	0.05005
4.74	0.0203023	7.8363e-05	0.0501666
4.79	0.0200585	8.0146e-05	0.0503987
4.84	0.0198147	8.1929e-05	0.0490817
4.88	0.0196197	8.33553e-05	0.0502964
4.91	0.0194734	8.44251e-05	0.0490684
4.96	0.0192296	8.62081e-05	0.0505302
5.01	0.0189859	8.79911e-05	0.0498781
5.04	0.0188396	8.90608e-05	0.0494433
5.09	0.0185958	9.08438e-05	0.049589
5.13	0.0184008	9.22702e-05	0.0529635
5.17	0.0182057	9.36966e-05	0.0492184
5.21	0.0180107	9.51229e-05	0.0497315
5.26	0.0177669	9.69059e-05	0.0493836
5.31	0.0175231	9.86889e-05	0.0491881
5.34	0.0173768	9.97587e-05	0.0484172
5.38	0.0171818	0.000101185	0.0491114
5.43	0.016938	0.000102968	0.0497872
5.46	0.0167917	0.000104038	0.0482072
5.51	0.016548	0.000105821	0.0495391
5.56	0.0163042	0.000107604	0.048334
5.6	0.0161091	0.00010903	0.048716
5.64	0.0159141	0.000110456	0.0495586
5.68	0.0157191	0.000111883	0.0511904
5.73	0.0154753	0.000113666	0.0493654
5.76	0.0153148	0.000114595	0.0514114
5.81	0.0150407	0.000116077	0.0510981
5.86	0.0147666	0.000117559	0.0497469
5.89	0.0146021	0.000118448	0.0511832
5.93	0.0143828	0.000119634	0.0499764
5.98	0.0141087	0.000121116	0.0488894
6.03	0.0138345	0.000122598	0.0510103
6.06	0.0136701	0.000123487	0.0491297
6.11	0.0133959	0.000124969	0.0493134
6.15	0.0131766	0.000126155	0.0500399
6.19	0.0129573	0.000127341	0.0510169
6.23	0.012738	0.000128526	0.0483561
6.28	0.0124639	0.000130009	0.050465
6.33	0.0121898	0.000131491	0.0493023
6.36	0.0120253	0.00013238	0.049544
6.41	0.0117512	0.000133862	0.0503904
6.45	0.0115319	0.000135048	0.0522316
6.48	0.0113674	0.000135937	0.0483213
6.53	0.0110933	0.000137419	0.0510867
6.58	0.0108192	0.000138901	0.0494884
6.62	0.0105999	0.000140087	0.0501917
6.66	0.0103806	0.000141272	0.0511422
6.7	0.0101613	0.000142458	0.0518229
6.75	0.00992958	0.000142579	0.0491377
6.79	0.00983692	0.000139701	0.051053
6.83	0.00974426	0.000136824	0.0512234
6.88	0.00962844	0.000133227	0.0511099
6.92	0.00953579	0.000130349	0.0522074
6.95	0.0094663	0.000128191	0.0528768
7	0.00935048	0.000124594	0.049265
7.05	0.00923465	0.000120997	0.0505003
7.09	0.009142	0.00011812	0.0499363
7.13	0.00904934	0.000115242	0.0498731
7.17	0.00895669	0.000112365	0.0504646
7.22	0.00884087	0.000108768	0.0490192
7.25	0.00877137	0.000106609	0.0495538
7.3	0.00865555	0.000103013	0.051586
7.35	0.00853973	9.94156e-05	0.0480433
7.39	0.00844708	9.6538e-05	0.0510146
7.42	0.00837758	9.43799e-05	0.0500222
7.47	0.00826176	9.07829e-05	0.0491128
7.52	0.00814594	8.7186e-05	0.050743
7.55	0.00807645	8.50278e-05	0.0499209
7.6	0.00796063	8.14308e-05	0.0505589
7.64	0.00786797	7.85533e-05	0.0514554
7.69	0.00775215	7.49563e-05	0.0493447
7.72	0.00768266	7.27982e-05	0.0487243
7.77	0.00759784	7.31709e-05	0.0525317
7.8	0.00755619	7.45783e-05	0.0515495
7.85	0.00748677	7.6924e-05	0.0503468
7.9	0.00741735	7.92697e-05	0.0526498
7.94	0.00736182	8.11463e-05	0.051791
7.99	0.0072924	8.3492e-05	0.05067
8.02	0.00725075	8.48994e-05	0.0503653
8.07	0.00718133	8.72451e-05	0.0484825
8.1	0.00713968	8.86525e-05	0.0511508
8.15	0.00707027	9.09982e-05	0.0481395
8.19	0.00701473	9.28748e-05	0.0487166
8.24	0.00694532	9.52205e-05	0.0511083
8.27	0.00690367	9.66279e-05	0.0483517
8.32	0.00683425	9.89736e-05	0.0501409
8.36	0.00677871	0.00010085	0.0521431
8.41	0.0067093	0.000103196	0.0506683
8.44	0.00666765	0.000104603	0.0519081
8.49	0.00659823	0.000106949	0.0492653
8.54	0.00652881	0.000109295	0.0510716
8.57	0.00648716	0.000110702	0.0494194
8.61	0.00643163	0.000112579	0.0508888
8.66	0.00636221	0.000114924	0.0484548
8.71	0.00629279	0.00011727	0.0514923
8.74	0.00625263	0.000118597	0.0500328
8.79	0.00620504	0.000119757	0.0499715
8.83	0.00616697	0.000120684	0.0490096
8.88	0.00611939	0.000121844	0.0480443
8.91	0.00609084	0.00012254	0.0491047
8.96	0.00604325	0.0001237	0.048311
9.01	0.00599566	0.00012486	0.0513576
9.04	0.00596711	0.000125555	0.0499893
9.08	0.00592904	0.000126483	0.0490529
9.13	0.00588146	0.000127643	0.0505649
9.18	0.00583387	0.000128803	0.0479594
9.21	0.00580532	0.000129498	0.0500861
9.26	0.00575773	0.000130658	0.0518938
9.3	0.00571967	0.000131586	0.049052
9.33	0.00569111	0.000132282	0.0489575
9.38	0.00564353	0.000133442	0.049352
9.43	0.00559594	0.000134601	0.0515615
9.47	0.00555787	0.000135529	0.0480711
9.51	0.0055198	0.000136457	0.0482475
9.55	0.00548174	0.000137385	0.051654
9.6	0.00543415	0.000138544	0.0472882
9.65	0.00538656	0.000139704	0.049776
9.68	0.00535801	0.0001404	0.0500106
9.72	0.00531994	0.000141328	0.0485523
9.77	0.00524924	0.000139073	0.0503157
9.8	0.00519993	0.000136702	0.0516441
9.85	0.00511774	0.000132751	0.0482955
9.9	0.00503555	0.000128799	0.0497747
9.94	0.0049698	0.000125638	0.0504102
9.97	0.00492048	0.000123267	0.0498147
10.02	0.00483829	0.000119315	0.0480095
10.07	0.0047561	0.000115364	0.0480971
10.1	0.00470679	0.000112993	0.0477887
10.15	0.0046246	0.000109041	0.0515678
10.19	0.00455884	0.00010588	0.0475265
10.24	0.00447665	0.000101928	0.0480975
10.27	0.00442734	9.95574e-05	0.048233
10.32	0.00434515	9.56058e-05	0.0478613
10.36	0.0042794	9.24446e-05	0.0497028
10.41	0.00419721	8.8493e-05	0.0489896
10.44	0.00414789	8.6122e-05	0.0497661
10.49	0.0040657	8.21705e-05	0.049453
10.54	0.00398351	7.82189e-05	0.0497581
10.57	0.0039342	7.58479e-05	0.0491687
10.61	0.00386845	7.26867e-05	0.051333
10.66	0.00378626	6.87351e-05	0.0509896
10.71	0.00370407	6.47835e-05	0.0514546
10.74	0.00366183	6.2681e-05	0.0513832
10.79	0.00368381	6.26768e-05	0.0510974
10.83	0.00370139	6.26735e-05	0.0499978
10.86	0.00371457	6.2671e-05	0.0491076
10.91	0.00373655	6.26669e-05	0.049579
10.96	0.00375852	6.26627e-05	0.050328
11.01	0.0037805	6.26585e-05	0.049017
11.04	0.00379368	6.2656e-05	0.049413
11.08	0.00381126	6.26527e-05	0.0494674
11.13	0.00383323	6.26486e-05	0.0498065
11.18	0.00385521	6.26444e-05	0.0486831
11.21	0.00386839	6.26419e-05	0.0518811
11.26	0.00389037	6.26378e-05	0.0489425
11.3	0.00390795	6.26344e-05	0.0493554
11.35	0.00392992	6.26303e-05	0.0476573
11.38	0.00394311	6.26278e-05	0.0509157
11.43	0.00396508	6.26236e-05	0.0486523
11.47	0.00398266	6.26203e-05	0.0496855
11.51	0.00400024	6.2617e-05	0.0502839
11.55	0.00401782	6.26136e-05	0.0481459
11.6	0.00403979	6.26095e-05	0.0492564
11.65	0.00406177	6.26053e-05	0.0490461
11.68	0.00407495	6.26028e-05	0.0510956
11.72	0.00409253	6.25995e-05	0.04852
11.77	0.00408906	6.54078e-05	0.0513135
11.8	0.00407938	6.79315e-05	0.0500551
11.85	0.00406325	7.21376e-05	0.0485559
11.9	0.00404713	7.63437e-05	0.047809
11.94	0.00403423	7.97086e-05	0.0488767
11.97	0.00402455	8.22322e-05	0.0492216
12.02	0.00400842	8.64384e-05	0.0503516
12.07	0.0039923	9.06445e-05	0.0510031
12.1	0.00398262	9.31681e-05	0.0476629
12.15	0.00396649	9.73742e-05	0.051116
12.19	0.00395359	0.000100739	0.0520499
12.24	0.00393747	0.000104945	0.0505599
12.27	0.00392779	0.000107469	0.0493351
12.32	0.00391166	0.000111675	0.049584
12.36	0.00389876	0.00011504	0.0485016
12.41	0.00388264	0.000119246	0.0503512
12.44	0.00387296	0.00012177	0.0503373
12.49	0.00385683	0.000125976	0.0496897
12.54	0.00384071	0.000130182	0.0488529
12.57	0.00383103	0.000132706	0.0518578
12.61	0.00381813	0.00013607	0.050977
12.66	0.003802	0.000140277	0.0499895
12.71	0.00378588	0.000144483	0.0524466
12.74	0.00377629	0.000146682	0.0501175
12.79	0.00376138	0.000146119	0.0508994
12.83	0.00374946	0.000145669	0.0491811
12.88	0.00373456	0.000145107	0.0500933
12.91	0.00372562	0.000144769	0.0502172
12.96	0.00371072	0.000144207	0.0482633
13.01	0.00369582	0.000143644	0.050365
13.05	0.0036839	0.000143194	0.0490514
13.08	0.00367496	0.000142856	0.0526673
13.13	0.00366006	0.000142294	0.0494204
13.18	0.00364515	0.000141731	0.0495027
13.21	0.00363621	0.000141394	0.0498198
13.26	0.00362131	0.000140831	0.049606
13.3	0.00360939	0.000140381	0.0502279
13.33	0.00360045	0.000140043	0.0506006
13.38	0.00358555	0.000139481	0.0511939
13.43	0.00357065	0.000138918	0.0503558
13.47	0.00355873	0.000138468	0.0500895
13.52	0.00354382	0.000137905	0.0494739
13.55	0.00353488	0.000137568	0.0514135
13.6	0.00351998	0.000137005	0.0503275
13.65	0.00350508	0.000136443	0.0495854
13.68	0.00349614	0.000136105	0.0496997
13.72	0.00348422	0.000135655	0.0518047
13.77	-0.0715299	-0.00161544	0.0499855
13.8	-0.190637	-0.00465774	0.0505719
13.85	-0.299697	-0.00981534	0.0479703
13.9	-0.325539	-0.0147996	0.0476548
13.94	-0.337611	-0.0188088	0.0474455
13.97	-0.345918	-0.0217974	0.0448906
14.02	-0.357252	-0.0268094	0.0454268
14.07	-0.368489	-0.0318061	0.0453617
14.1	-0.375361	-0.0348127	0.0469219
14.15	-0.385516	-0.0398013	0.0440364
14.19	-0.392628	-0.043794	0.043226
14.24	-0.400453	-0.0487946	0.0437849
14.27	-0.405543	-0.0518137	0.0420921
14.32	-0.413687	-0.0567981	0.0391949
14.36	-0.421468	-0.0608016	0.0424257
14.41	-0.429281	-0.0658011	0.0394395
14.44	-0.433037	-0.0688014	0.0406388
14.49	-0.440356	-0.0738097	0.0435791
14.54	-0.448196	-0.07879	0.0395542
14.57	-0.452841	-0.0818093	0.0392318
14.61	-0.458061	-0.0857996	0.0399674
14.66	-0.464797	-0.0907969	0.0401067
14.71	-0.47095	-0.0957849	0.0425377
14.74	-0.474929	-0.0987913	0.0384975
14.79	-0.481159	-0.103787	0.0394569
14.83	-0.487595	-0.107803	0.0374648
14.88	-0.494678	-0.112786	0.0354656
14.91	-0.498444	-0.115801	0.0347735
14.96	-0.504968	-0.120794	0.0353808
15.01	-0.511608	-0.12581	0.0357183
15.04	-0.51461	-0.128792	0.0375303
15.08	-0.52058	-0.13279	0.0377981
15.13	-0.526778	-0.137801	0.0396202
15.18	-0.533549	-0.142786	0.0361973
15.21	-0.537879	-0.145795	0.0385988
15.26	-0.546191	-0.150779	0.0384888
15.3	-0.554494	-0.15479	0.0360801
15.33	-0.560536	-0.157796	0.0364268
15.38	-0.572075	-0.162792	0.0396985
15.43	-0.585184	-0.167794	0.0387743
15.47	-0.598068	-0.171769	0.0363011
15.51	-0.614453	-0.175792	0.0366791
15.55	-0.629298	-0.17978	0.0388767
15.6	-0.651095	-0.184773	0.0340248
15.65	-0.676466	-0.189773	0.0358476
15.68	-0.69375	-0.192781	0.0354181
15.72	-0.714281	-0.196785	0.0343498
15.77	-0.745623	-0.201769	0.0339034
15.8	-0.764987	-0.204768	0.0370343
15.85	-0.797447	-0.209777	0.0379051
15.9	-0.831926	-0.214768	0.0361981
15.94	-0.857871	-0.218756	0.0301712
15.97	-0.878952	-0.221744	0.0365572
16.02	-0.912538	-0.226748	0.035992
16.07	-0.948044	-0.231744	0.0366903
16.1	-0.968923	-0.234741	0.0288177
16.15	-1.0019	-0.239731	0.0326027
16.19	-1.02669	-0.243745	0.0281637
16.24	-1.05813	-0.248731	0.0321342
16.27	-1.0779	-0.25173	0.0278694
16.32	-1.10315	-0.256784	0.0331526
16.36	-1.12467	-0.260824	0.0309458
16.41	-1.15047	-0.265829	0.0303072
16.44	-1.16501	-0.268828	0.0310617
16.49	-1.19183	-0.27383	0.0297132
16.54	-1.21853	-0.278826	0.0326456
16.57	-1.23208	-0.281828	0.0313712
16.61	-1.25337	-0.285836	0.0293128
16.66	-1.28258	-0.290841	0.0323775
16.71	-1.3077	-0.29582	0.0326511
16.74	-1.32408	-0.298817	0.0300231
16.79	-0.700859	-0.295788	0.0314793
16.83	-0.4129	-0.291791	0.0373862
16.88	-0.178223	-0.286819	0.0367599
16.91	-0.0753884	-0.283792	0.0340973
16.96	0.0500877	-0.278812	0.0377383
17.01	0.131629	-0.27383	0.0354059
17.04	0.167322	-0.270814	0.0340007
17.08	0.205119	-0.266825	0.0335892
17.13	0.241737	-0.261835	0.0370439
17.18	0.272953	-0.25684	0.0372703
17.21	0.286805	-0.253828	0.0396905
17.26	0.309481	-0.248845	0.0384856
17.3	0.324626	-0.244847	0.037211
17.33	0.334202	-0.241831	0.0381749
17.38	0.351078	-0.236825	0.0412376
17.43	0.365062	-0.231824	0.0397462
17.47	0.374559	-0.227841	0.0391916
17.51	0.383255	-0.223841	0.036973
17.55	0.392802	-0.219846	0.0380191
17.6	0.40227	-0.214847	0.0388845
17.63	0.408517	-0.211856	0.0425427
17.68	0.417363	-0.206847	0.0431145
17.73	0.425664	-0.201838	0.0386489
17.77	0.431777	-0.197847	0.0377086
17.8	0.435742	-0.194843	0.0396039
17.85	0.442588	-0.189856	0.0368053
17.9	0.449977	-0.184827	0.035953
17.94	0.455262	-0.180839	0.0348328
17.98	0.459896	-0.17685	0.0362024
18.02	0.464872	-0.172843	0.0373503
18.07	0.470307	-0.167847	0.0388047
18.1	0.472334	-0.164855	0.0407843
18.15	0.477174	-0.159867	0.0408184
18.19	0.482083	-0.155853	0.0406665
18.24	0.487437	-0.150858	0.0413828
18.29	0.49175	-0.145854	0.0415448
18.32	0.496025	-0.142844	0.041811
18.37	0.500413	-0.137856	0.0403172
18.41	0.5047	-0.133849	0.0414292
18.44	0.50718	-0.130854	0.0417402
18.49	0.51225	-0.125856	0.045727
18.54	0.515455	-0.12086	0.0425857
18.57	0.51822	-0.117851	0.0444938
18.62	0.520336	-0.11286	0.0463438
18.66	0.523167	-0.108862	0.0450095
18.71	0.526234	-0.103837	0.0435496
18.74	0.530735	-0.100853	0.0416476
18.79	0.535015	-0.0958463	0.0431498
18.83	0.538688	-0.0918577	0.0449777
18.87	0.541472	-0.0878667	0.0457797
18.91	0.544693	-0.0838674	0.0468756
18.96	0.548801	-0.0788761	0.0455404
19.01	0.553437	-0.0738705	0.0483661
19.04	0.555608	-0.0708708	0.0460432
19.08	0.558242	-0.0668555	0.0493227
19.13	0.562179	-0.0618622	0.0462874
19.18	0.566212	-0.0568584	0.0484422
19.21	0.568462	-0.0538599	0.0444791
19.26	0.572853	-0.048867	0.0454033
19.3	0.576444	-0.0448584	0.0461258
19.33	0.578688	-0.0418719	0.0476122
19.38	0.584654	-0.0368647	0.046953
19.43	0.588528	-0.0318665	0.0480161
19.48	0.595103	-0.0268741	0.0498936
19.51	0.59803	-0.0238666	0.0481516
19.55	0.602778	-0.0198694	0.0496045
19.6	0.608319	-0.014864	0.0531672
19.63	0.611257	-0.0118755	0.051877
19.68	0.617345	-0.00688062	0.0512095
19.73	0.625352	-0.00187016	0.0516356
19.77	0.631679	0.00213011	0.0529867
19.8	0.637059	0.00511933	0.0518949
19.85	0.645967	0.0101263	0.0543088
19.9	0.653708	0.0151164	0.0529381
19.94	0.662071	0.0191094	0.0525324
19.98	0.66859	0.0231348	0.0517247
20.02	0.67774	0.0271121	0.0504387
20.07	0.688097	0.0321164	0.0522603
20.1	0.695176	0.0351211	0.0530351
20.15	0.706483	0.0401164	0.0507147
20.19	0.716036	0.0441174	0.0520603
20.24	0.729534	0.0491162	0.0523921
20.27	0.737006	0.0521221	0.0550805
20.32	0.746733	0.057111	0.0531578
20.37	0.758413	0.062118	0.0553623
20.4	0.764735	0.0651029	0.0546754
20.44	0.772361	0.0690998	0.055829
20.49	0.782346	0.0740891	0.0562077
20.54	0.793099	0.0790968	0.0562972
20.57	0.801002	0.0821099	0.0550632
20.62	0.813507	0.0870928	0.0548713
20.66	0.82301	0.0910759	0.057044
20.71	0.836165	0.0960911	0.0569573
20.74	0.843763	0.0990879	0.0572566
20.79	0.854803	0.104091	0.0577633
20.83	0.863429	0.108083	0.0553196
20.87	0.876393	0.112089	0.0575188
20.91	0.884691	0.116096	0.0552501
20.96	0.894883	0.121091	0.0552882
21.01	0.906304	0.126089	0.0550706
21.04	0.915018	0.129085	0.0550154
21.08	0.926576	0.133094	0.0564314
21.13	0.944283	0.138088	0.0605348
21.16	0.955011	0.141079	0.0577487
21.21	0.973476	0.146076	0.059148
21.26	0.995322	0.151073	0.058296
21.3	1.01448	0.155078	0.0575309
21.33	1.02851	0.158085	0.0608844
21.38	1.05378	0.163073	0.0633192
21.43	1.08281	0.168071	0.0628715
21.48	1.11259	0.173157	0.0599313
21.51	1.12947	0.176169	0.0594413
21.55	1.15465	0.180177	0.0598514
21.6	1.1923	0.18517	0.0590974
21.63	1.21502	0.188166	0.0588443
21.68	1.25735	0.193164	0.0596635
21.73	1.30292	0.198169	0.0588773
21.77	1.33968	0.202163	0.0569547
21.8	1.36871	0.205184	0.0607204
21.85	1.41574	0.210174	0.0572989
21.9	1.46389	0.215167	0.062672
21.94	1.50158	0.219192	0.06145
21.98	1.53553	0.22317	0.0602547
22.02	1.57289	0.227186	0.0603554
22.07	1.60975	0.232179	0.0644319
22.1	1.62683	0.23516	0.0639758
22.15	1.65497	0.240163	0.0635303
22.19	1.6681	0.24417	0.0636413
22.24	1.67721	0.249157	0.0633325
22.27	1.6798	0.252164	0.0659535
22.32	1.67408	0.257169	0.0658925
22.37	1.65692	0.262173	0.0649152
22.4	1.64153	0.265168	0.0661687
22.44	1.61805	0.269158	0.0665368
22.49	1.58268	0.274167	0.0688655
22.54	1.54432	0.279169	0.0649865
22.57	1.52148	0.282157	0.0679453
22.62	1.48172	0.287162	0.065551
22.66	1.44989	0.291165	0.0677481
22.71	1.41175	0.296167	0.0667549
22.76	1.22589	0.299161	0.0660188
22.79	0.984628	0.296141	0.0659716
22.83	0.778002	0.292173	0.0660339
22.87	0.62967	0.288157	0.0674718
22.91	0.516615	0.284171	0.0638592
22.96	0.410345	0.279163	0.0675779
23.01	0.318527	0.274156	0.0654103
23.04	0.274897	0.271148	0.0649157
23.08	0.227744	0.267151	0.0631253
23.13	0.177866	0.262149	0.0624239
23.18	0.134516	0.257144	0.0641765
23.21	0.113023	0.254156	0.0642936
23.26	0.0791597	0.249163	0.0641592
23.3	0.0561693	0.245156	0.0641824
23.33	0.0410133	0.242165	0.0624415
23.38	0.0152033	0.237153	0.0627807
23.43	-0.00592943	0.232158	0.0614835
23.48	-0.0266405	0.227157	0.0617922
23.51	-0.037914	0.224172	0.0603383
23.55	-0.0506161	0.22016	0.0616415
23.6	-0.0664701	0.215166	0.0612519
23.63	-0.0759116	0.212165	0.0604581
23.68	-0.089304	0.207165	0.0589153
23.73	-0.102372	0.202163	0.0596928
23.77	-0.111371	0.198161	0.058721
23.8	-0.118547	0.195166	0.061098
23.85	-0.129272	0.190156	0.0582927
23.9	-0.138843	0.185162	0.0615362
23.94	-0.147435	0.181173	0.0628131
23.98	-0.154757	0.177177	0.0576844
24.02	-0.162292	0.173174	0.0588822
24.07	-0.171812	0.168168	0.0629889
24.1	-0.176012	0.165181	0.0622699
24.15	-0.183899	0.160193	0.0633666
24.19	-0.190578	0.15618	0.0602427
24.24	-0.19785	0.151175	0.0612251
24.27	-0.201774	0.148173	0.0573738
24.32	-0.209005	0.143186	0.0588059
24.37	-0.216747	0.138185	0.0572981
24.4	-0.220698	0.135186	0.0555525
24.44	-0.227085	0.131196	0.0552817
24.49	-0.233574	0.126184	0.0575187
24.54	-0.239698	0.121171	0.0586661
24.58	-0.244542	0.117184	0.0553465
24.62	-0.248759	0.113184	0.0560565
24.66	-0.2541	0.109201	0.0571174
24.71	-0.260896	0.104182	0.0585748
24.74	-0.265056	0.101189	0.054504
24.79	-0.271139	0.0961924	0.0539536
24.83	-0.275746	0.0921975	0.0553444
24.87	-0.279949	0.0881848	0.054742
24.91	-0.285905	0.0841753	0.0568785
24.96	-0.291859	0.0791851	0.0528058
25.01	-0.297878	0.074196	0.0519171
25.04	-0.300332	0.071193	0.0539703
25.08	-0.306389	0.0671917	0.0534355
25.13	-0.311965	0.0621964	0.0517157
25.18	-0.317347	0.05721	0.0496221
25.21	-0.322432	0.0542056	0.0518699
25.26	-0.329702	0.0491984	0.0504183
25.3	-0.334791	0.0451853	0.0526984
25.35	-0.34079	0.040192	0.0506599
25.38	-0.345416	0.0372047	0.052154
25.43	-0.351678	0.0322018	0.0540228
25.48	-0.358792	0.0271992	0.0526433
25.52	-0.365398	0.0232192	0.0519402
25.55	-0.369548	0.0202148	0.0536209
25.6	-0.37869	0.0152075	0.0502063
25.63	-0.384371	0.0122133	0.0526957
25.68	-0.392952	0.00719663	0.052471
25.73	-0.402068	0.00219682	0.0529822
25.77	-0.409251	-0.00179641	0.0470462
25.8	-0.414836	-0.00480498	0.0479738
25.85	-0.424685	-0.00979303	0.048001
25.9	-0.436776	-0.0147802	0.0481398
25.94	-0.446768	-0.018786	0.0487538
25.98	-0.455929	-0.0227894	0.0512653
26.02	-0.467257	-0.0267844	0.0469736
26.07	-0.48162	-0.0317842	0.0496995
26.1	-0.491505	-0.0347906	0.0469788
26.15	-0.507341	-0.0397753	0.0460893
26.19	-0.522649	-0.0437789	0.0456929
26.24	-0.541713	-0.0487861	0.0425634
26.27	-0.553741	-0.0517774	0.0455236
26.32	-0.57696	-0.0567763	0.044007
26.37	-0.603104	-0.0617605	0.0439131
26.4	-0.619206	-0.0647515	0.0445572
26.44	-0.64388	-0.0687557	0.0427574
26.49	-0.673816	-0.0737606	0.0430084
26.54	-0.70665	-0.0787691	0.0414528
26.57	-0.727552	-0.0817459	0.0420318
26.62	-0.768089	-0.0867407	0.0427742
26.66	-0.804213	-0.0907268	0.0443542
26.71	-0.854877	-0.0957241	0.0436324
26.74	-0.887464	-0.0987207	0.0416577
26.79	-0.947918	-0.103722	0.0421881
26.83	-0.999925	-0.107725	0.0399898
26.87	-1.05361	-0.111706	0.0364915
26.91	-1.11487	-0.115724	0.0409202
26.96	-1.18787	-0.120814	0.0392402
27.01	-1.26758	-0.125802	0.0396798
27.04	-1.31692	-0.128788	0.0430092
27.08	-1.37699	-0.132799	0.0421157
27.13	-1.45113	-0.137805	0.0393697
27.18	-1.5175	-0.14279	0.0384109
27.21	-1.5553	-0.145793	0.0379245
27.26	-1.61309	-0.150797	0.0382483
27.3	-1.65275	-0.154803	0.0395983
27.33	-1.6823	-0.157815	0.0397086
27.38	-1.72233	-0.162803	0.0398175
27.43	-1.7521	-0.167798	0.039103
27.48	-1.77496	-0.172792	0.04217
27.51	-1.78478	-0.175794	0.0403198
27.55	-1.79	-0.179783	0.0383245
27.6	-1.79138	-0.184795	0.0388887
27.63	-1.7893	-0.187796	0.0363185
27.68	-1.7775	-0.192783	0.0379377
27.73	-1.76009	-0.197786	0.0353335
27.77	-1.74097	-0.201789	0.0367829
27.8	-1.72424	-0.204793	0.0376583
27.85	-1.69515	-0.209788	0.0378627
27.9	-1.66112	-0.214796	0.0372192
27.94	-1.63874	-0.218807	0.0406492
27.98	-1.61109	-0.222786	0.0358426
28.02	-1.58595	-0.2268	0.0344333
28.07	-1.55582	-0.231807	0.0370629
28.1	-1.54121	-0.234792	0.0371605
28.15	-1.51789	-0.239793	0.0362151
28.19	-1.5018	-0.243797	0.0368548
28.24	-1.48531	-0.248792	0.0349531
28.27	-1.47574	-0.251789	0.0350954
28.32	-1.46471	-0.256807	0.0343221
28.37	-1.45338	-0.261805	0.0340251
28.41	-1.45014	-0.265806	0.0329125
28.44	-1.44823	-0.268789	0.0323198
28.49	-1.44517	-0.273796	0.0343729
28.54	-1.44171	-0.278787	0.0338212
28.57	-1.43876	-0.281793	0.0355251
28.62	-1.43802	-0.286788	0.0359876
28.66	-1.43796	-0.290803	0.0351933
28.71	-1.43941	-0.295793	0.0323069
28.74	-1.43995	-0.298797	0.0380097
28.79	-0.810228	-0.295811	0.0362552
28.83	-0.516454	-0.291809	0.0364294
28.87	-0.316398	-0.28782	0.0388089
28.91	-0.17545	-0.283816	0.038321
28.96	-0.0529111	-0.278826	0.0354388
29.01	0.0364218	-0.273811	0.0369647
29.04	0.0805825	-0.270822	0.0402527
29.08	0.122316	-0.266831	0.0427529
29.13	0.164564	-0.26182	0.0416557
29.18	0.19798	-0.256845	0.0381
29.21	0.214764	-0.253828	0.0402776
29.26	0.240249	-0.248834	0.0390251
29.3	0.259892	-0.244823	0.0383691
29.33	0.271545	-0.241836	0.0380079
29.38	0.288217	-0.23685	0.0393432
29.43	0.306935	-0.231847	0.0398059
29.48	0.321642	-0.226851	0.0401289
29.51	0.330042	-0.223845	0.0419553
29.55	0.341619	-0.219858	0.0406669
29.6	0.352486	-0.214864	0.0382876
29.63	0.358868	-0.21184	0.0417264
29.68	0.369878	-0.206848	0.0412391
29.73	0.3803	-0.201857	0.0388079
29.77	0.387629	-0.197867	0.0402357
29.8	0.392651	-0.19487	0.037666
29.85	0.401982	-0.18985	0.0389051
29.9	0.409447	-0.184848	0.038148
29.94	0.414885	-0.180853	0.0402108
29.98	0.420448	-0.176873	0.0392946
30.02	0.427352	-0.172874	0.0386675
30.07	0.433983	-0.167873	0.0406032
30.1	0.437317	-0.164878	0.0436738
30.15	0.444531	-0.159875	0.0434439
30.19	0.448615	-0.155886	0.0419318
30.24	0.45454	-0.150883	0.0415208
30.27	0.458064	-0.147876	0.0421779
30.32	0.464151	-0.142866	0.043304
30.37	0.469415	-0.137868	0.0445579
30.4	0.471758	-0.134879	0.0437376
30.44	0.475341	-0.130895	0.0438962
30.49	0.480778	-0.125879	0.046614
30.54	0.485675	-0.120875	0.046374
30.57	0.489202	-0.117876	0.0462203
30.62	0.494989	-0.112881	0.0448791
30.66	0.497885	-0.108884	0.0455361
30.71	0.501748	-0.103881	0.0448694
30.74	0.504917	-0.100881	0.0473102
30.79	0.508976	-0.095876	0.046881
30.83	0.513317	-0.0918799	0.046833
30.87	0.517753	-0.0878883	0.0464775
30.91	0.51987	-0.0838935	0.045289
30.96	0.524754	-0.0788929	0.0484936
31.01	0.530632	-0.0739197	0.0487369
31.04	0.533111	-0.0709028	0.0496015
31.08	0.537036	-0.0668846	0.0472865
31.13	0.541535	-0.0619047	0.0513167
31.18	0.545414	-0.0568934	0.0501564
31.21	0.5471	-0.053901	0.0508033
31.26	0.55185	-0.0488984	0.0510452
31.3	0.555903	-0.044881	0.049919
31.33	0.558027	-0.0418954	0.0507279
31.38	0.563198	-0.0368838	0.0474551
31.43	0.569574	-0.0319026	0.0507597
31.48	0.573433	-0.0268902	0.0512053
31.51	0.576289	-0.0238972	0.0500213
31.55	0.582745	-0.0198859	0.051133
31.6	0.588886	-0.0148849	0.0519666
31.65	0.59423	-0.00991129	0.0541052
31.68	0.597991	-0.00690814	0.0527738
31.73	0.604849	-0.00190444	0.0531988
31.77	0.610836	0.00210443	0.0520027
31.8	0.615519	0.00509966	0.0523733
31.85	0.623626	0.0101088	0.0539165
31.9	0.632592	0.0150937	0.0541909
31.94	0.639039	0.0190944	0.052968
31.98	0.647188	0.023101	0.0548522
32.02	0.654782	0.02709	0.0530935
32.07	0.663987	0.032106	0.0547711
32.1	0.670279	0.0350966	0.0513836
32.15	0.680484	0.0400833	0.0549759
32.19	0.689813	0.0440879	0.0514516
32.24	0.70067	0.0490905	0.0538512
32.27	0.708005	0.0521079	0.0559485
32.32	0.719138	0.057101	0.0558723
32.37	0.731126	0.0621054	0.0543543
32.41	0.741595	0.0660871	0.0545223
32.44	0.750002	0.0691013	0.0545667
32.49	0.763648	0.0740835	0.0537083
32.54	0.775279	0.079092	0.0537241
32.57	0.781872	0.0820843	0.0562254
32.62	0.7925	0.0870798	0.0547767
32.66	0.800077	0.0910787	0.0574505
32.71	0.812437	0.0960823	0.0542057
32.74	0.819504	0.0990726	0.0574365
32.79	0.832376	0.104077	0.0545785
32.83	0.844298	0.108088	0.0581492
32.87	0.855808	0.112085	0.0561425
32.91	0.869805	0.116087	0.0570742
32.96	0.88673	0.121073	0.0563287
33.01	0.902658	0.126076	0.0593039
33.04	0.911781	0.129086	0.0583471
33.08	0.923522	0.13309	0.0560738
33.13	0.939003	0.138085	0.056305
33.18	0.957611	0.143061	0.0577036
33.21	0.970436	0.146073	0.0556819
33.26	0.993472	0.151058	0.0565446
33.3	1.01503	0.155079	0.0607304
33.33	1.03106	0.158076	0.0569134
33.38	1.0596	0.16305	0.0589644
33.43	1.0927	0.168087	0.0565172
33.48	1.12466	0.173164	0.0622169
33.51	1.14376	0.17614	0.0624759
33.55	1.17662	0.180144	0.0624758
33.6	1.21623	0.185158	0.0613074
33.63	1.24018	0.188162	0.0617981
33.68	1.28452	0.19314	0.0617479
33.73	1.32905	0.198152	0.061069
33.77	1.36248	0.202146	0.0612522
33.8	1.38887	0.205152	0.0601952
33.85	1.43049	0.210158	0.0634068
33.9	1.46865	0.215153	0.064227
33.94	1.49564	0.219158	0.0633601
33.98	1.5163	0.223155	0.0616929
34.02	1.53575	0.227149	0.0618736
34.07	1.55029	0.232154	0.0618735
34.1	1.55375	0.235156	0.0656981
34.15	1.55302	0.240148	0.0653487
34.21	1.53754	0.246162	0.0643483
34.24	1.52551	0.249153	0.0651693
34.27	1.51003	0.252155	0.064845
34.32	1.4769	0.25716	0.0673914
34.37	1.43934	0.262153	0.0665121
34.4	1.41743	0.265167	0.0674299
34.44	1.38341	0.26916	0.0677864
34.49	1.34327	0.274172	0.0684477
34.54	1.305	0.279154	0.0675995
34.57	1.28492	0.282166	0.0670635
34.62	1.2499	0.287154	0.0671376
34.66	1.22812	0.291154	0.0667066
34.71	1.20195	0.296172	0.0671971
34.74	1.18799	0.299168	0.0671878
34.79	0.813521	0.296209	0.0684232
34.83	0.633807	0.292205	0.0673697
34.88	0.481654	0.287205	0.0653452
34.91	0.413282	0.284221	0.0661467
34.96	0.322198	0.2792	0.0688022
35.01	0.239487	0.274171	0.0677099
35.04	0.206267	0.271173	0.0665489
35.1	0.147067	0.265179	0.0658568
35.13	0.122683	0.262186	0.0664604
35.18	0.0855464	0.257192	0.0657725
35.21	0.0672107	0.254189	0.0641281
35.26	0.0377042	0.249193	0.0638336
35.3	0.0178297	0.245181	0.0638337
35.34	-0.00164149	0.241185	0.0639001
35.38	-0.018156	0.237194	0.0636117
35.43	-0.03733	0.232193	0.0642023
35.48	-0.0528347	0.227191	0.0635071
35.51	-0.0634524	0.224196	0.0618884
35.55	-0.0760032	0.2202	0.063525
35.6	-0.0901248	0.215198	0.0632386
35.63	-0.0989587	0.212201	0.0616976
35.68	-0.110374	0.207206	0.0650836
35.73	-0.122033	0.20219	0.0611208
35.77	-0.130897	0.198215	0.0636581
35.8	-0.13714	0.195204	0.0624892
35.85	-0.147521	0.190208	0.0599339
35.9	-0.156936	0.185217	0.0612031
35.93	-0.162899	0.1822	0.0612438
35.98	-0.170672	0.177206	0.0600767
36.02	-0.177414	0.173198	0.0594491
36.07	-0.185495	0.168203	0.0610066
36.1	-0.189799	0.165206	0.0607192
36.15	-0.198339	0.160212	0.0611818
36.19	-0.204354	0.156201	0.0617118
36.24	-0.212091	0.151203	0.0603222
36.27	-0.215887	0.148221	0.0616926
36.32	-0.222215	0.143212	0.060616
36.37	-0.228901	0.138213	0.0601222
36.4	-0.231461	0.135219	0.0575156
36.44	-0.237855	0.131218	0.0566028
36.49	-0.24341	0.126223	0.0564263
36.54	-0.250169	0.121221	0.0566989
36.57	-0.253367	0.118223	0.0570262
36.62	-0.260426	0.113211	0.0575136
36.66	-0.264587	0.109231	0.0560069
36.71	-0.270196	0.104221	0.0595117
36.74	-0.273704	0.101229	0.0591894
36.79	-0.278405	0.0962154	0.0576323
36.84	-0.284186	0.0912225	0.0583074
36.87	-0.28838	0.08821	0.0574597
36.91	-0.292014	0.084208	0.0547464
36.96	-0.298918	0.0792067	0.0570757
37.01	-0.304518	0.0742231	0.0533598
37.04	-0.309291	0.0712083	0.0547098
37.09	-0.314635	0.066216	0.0538099
37.13	-0.31887	0.0622154	0.0545774
37.16	-0.322458	0.0592246	0.0571287
37.21	-0.32881	0.054217	0.0546416
37.26	-0.334159	0.0492233	0.0572028
37.3	-0.339276	0.0452196	0.0537232
37.35	-0.34585	0.0402344	0.0538727
37.38	-0.349896	0.0372325	0.0525722
37.43	-0.35625	0.0322266	0.0555058
37.48	-0.363843	0.0272262	0.0545092
37.51	-0.369318	0.0242269	0.0538152
37.55	-0.374095	0.020239	0.0527497
37.6	-0.382069	0.0152207	0.0537808
37.63	-0.386278	0.0122348	0.0534719
37.68	-0.394887	0.0072294	0.0544408
37.73	-0.403193	0.00223836	0.055697
37.77	-0.411877	-0.0017735	0.0530167
37.8	-0.417517	-0.0047748	0.0508973
37.85	-0.4279	-0.00976844	0.0502994
37.9	-0.438112	-0.0147587	0.049167
37.93	-0.443908	-0.0177614	0.0506501
37.98	-0.456051	-0.0227514	0.0503815
38.02	-0.467387	-0.0267477	0.0514044
38.07	-0.480221	-0.0317547	0.0482784
38.1	-0.489423	-0.0347479	0.0523791
38.15	-0.504367	-0.0397438	0.0504808
38.19	-0.517897	-0.0437325	0.0480379
38.24	-0.538295	-0.0487321	0.0471681
38.27	-0.549251	-0.0517324	0.0461552
38.32	-0.569342	-0.0567419	0.0471442
38.37	-0.589978	-0.0617369	0.0478097
38.4	-0.602858	-0.0647423	0.0464046
38.44	-0.624997	-0.0687423	0.0443639
38.49	-0.652833	-0.0737282	0.0473292
38.54	-0.686	-0.0787256	0.0498272
38.57	-0.705872	-0.0817378	0.0456336
38.62	-0.743831	-0.0867155	0.0432466
38.66	-0.775463	-0.0907126	0.0429864
38.71	-0.821964	-0.0957021	0.04172
38.74	-0.851157	-0.0987089	0.04432
38.79	-0.903975	-0.103702	0.0446804
38.84	-0.963586	-0.10869	0.0443969
38.87	-1.00122	-0.111694	0.0410153
38.91	-1.05541	-0.115686	0.0416508
38.96	-1.12114	-0.120739	0.0428193
39.01	-1.19987	-0.125775	0.0405569
39.04	-1.24529	-0.128774	0.0418816
39.09	-1.31702	-0.133768	0.0423501
39.13	-1.37618	-0.137773	0.042871
39.16	-1.41635	-0.140761	0.0434179
39.21	-1.48091	-0.14577	0.0424683
39.26	-1.54202	-0.150777	0.0433918
39.3	-1.58486	-0.154778	0.0412091
39.34	-1.62587	-0.158771	0.0393173
39.38	-1.65982	-0.162776	0.039962
39.43	-1.69629	-0.167769	0.0400994
39.48	-1.72347	-0.172763	0.0415104
39.51	-1.73564	-0.175774	0.0424673
39.55	-1.75021	-0.179769	0.0402712
39.6	-1.75978	-0.184776	0.0417388
39.63	-1.76107	-0.187776	0.0393197
39.68	-1.75855	-0.192772	0.0381859
39.73	-1.74969	-0.19777	0.0391065
39.77	-1.73789	-0.201763	0.0412504
39.8	-1.7266	-0.204778	0.041284
39.85	-1.70402	-0.209775	0.0408783
39.9	-1.6783	-0.214788	0.0385771
39.93	-1.66002	-0.217778	0.0382255
39.98	-1.62852	-0.222772	0.0388638
40.02	-1.60938	-0.226792	0.0353784
40.07	-1.58251	-0.23178	0.0351181
40.1	-1.56358	-0.234776	0.0367072
40.15	-1.53651	-0.239782	0.0389966
40.19	-1.51853	-0.243781	0.0364166
40.24	-1.4962	-0.248776	0.0383527
40.27	-1.48432	-0.251771	0.036189
40.32	-1.46942	-0.256776	0.0366562
40.37	-1.45657	-0.261776	0.0393431
40.4	-1.4512	-0.264799	0.0382506
40.44	-1.44247	-0.268768	0.0394133
40.49	-1.43366	-0.273785	0.0327192
40.54	-1.42767	-0.27878	0.0356496
40.57	-1.4227	-0.281784	0.0387195
40.62	-1.41472	-0.286784	0.0383421
40.66	-1.4127	-0.290788	0.0411745
40.71	-1.40782	-0.295785	0.0399133
40.74	-1.40607	-0.298778	0.0367964
40.79	-0.784837	-0.295837	0.0368646
40.84	-0.445809	-0.290856	0.038013
40.87	-0.307072	-0.28785	0.0392686
40.91	-0.171533	-0.283859	0.041275
40.96	-0.0451489	-0.278836	0.0395783
41.01	0.0353472	-0.273847	0.041263
41.04	0.0729556	-0.270852	0.0407654
41.09	0.121066	-0.265875	0.0402179
41.13	0.155462	-0.26186	0.0427576
41.18	0.189513	-0.256874	0.041345
41.21	0.205663	-0.253881	0.04041
41.26	0.230526	-0.248875	0.0415067
41.3	0.250669	-0.244879	0.0407484
41.34	0.26438	-0.240873	0.0438667
41.38	0.280002	-0.236892	0.0430298
41.43	0.295668	-0.231878	0.0404586
41.48	0.311593	-0.226891	0.0406394
41.51	0.320069	-0.223896	0.0409327
41.55	0.330946	-0.219877	0.0412661
41.6	0.342149	-0.214884	0.0427244
41.63	0.348661	-0.211882	0.0401849
41.68	0.359682	-0.206893	0.043381
41.73	0.370392	-0.201884	0.0419754
41.77	0.377145	-0.197874	0.040111
41.8	0.38306	-0.194878	0.04096
41.85	0.391673	-0.189885	0.0446387
41.9	0.399018	-0.184877	0.0418013
41.94	0.404712	-0.180864	0.042151
41.98	0.410619	-0.17688	0.0420867
42.02	0.41534	-0.172878	0.0432943
42.07	0.423471	-0.167877	0.0426677
42.1	0.4271	-0.164894	0.0440907
42.15	0.433088	-0.159901	0.0432558
42.19	0.438324	-0.155897	0.0438969
42.24	0.444485	-0.150895	0.0441185
42.27	0.447486	-0.147894	0.0460216
42.32	0.452675	-0.142879	0.0453427
42.37	0.457344	-0.137902	0.0454552
42.4	0.461762	-0.134902	0.0477996
42.44	0.464803	-0.130903	0.0472893
42.49	0.47066	-0.125891	0.0467536
42.54	0.475375	-0.12091	0.0466964
42.57	0.479169	-0.117898	0.047128
42.62	0.483706	-0.112885	0.0432541
42.66	0.488558	-0.108888	0.0465296
42.71	0.492648	-0.103889	0.0484133
42.74	0.494957	-0.100892	0.0492711
42.79	0.499496	-0.0958892	0.0467721
42.84	0.503974	-0.0908952	0.046007
42.87	0.506748	-0.0879089	0.0488502
42.91	0.510027	-0.0838907	0.04975
42.96	0.515724	-0.0789156	0.0507238
43.01	0.520155	-0.0739087	0.0499754
43.04	0.521062	-0.0709089	0.0500466
43.09	0.526612	-0.0659068	0.0511966
43.13	0.532262	-0.0619046	0.0506196
43.18	0.535552	-0.0569098	0.0489067
43.21	0.538732	-0.053902	0.0507861
43.26	0.542401	-0.0489142	0.0511973
43.3	0.546155	-0.044902	0.0491879
43.34	0.548432	-0.0408958	0.0494102
43.38	0.553046	-0.0369018	0.0512468
43.43	0.558122	-0.0319014	0.0514211
43.48	0.564347	-0.0269168	0.0532599
43.51	0.566444	-0.0239192	0.0540086
43.55	0.570529	-0.0199191	0.054038
43.6	0.577632	-0.0149064	0.0544436
43.63	0.580962	-0.0119238	0.0536328
43.68	0.587719	-0.00692176	0.0524216
43.73	0.594749	-0.00192719	0.0553304
43.77	0.599954	0.00209626	0.0553366
43.8	0.604036	0.00508249	0.0563739
43.85	0.611523	0.0100902	0.054804
43.9	0.620382	0.0150773	0.0554567
43.94	0.627424	0.0190794	0.0538249
43.98	0.635133	0.0230818	0.0547387
44.02	0.64243	0.0270718	0.0535208
44.07	0.651331	0.0320847	0.05446
44.1	0.65729	0.0350819	0.0556004
44.15	0.666616	0.0400911	0.0564472
44.19	0.675575	0.0440671	0.0521709
44.24	0.687014	0.049072	0.0531092
44.27	0.694015	0.0520685	0.055086
44.32	0.704717	0.0570588	0.0556719
44.37	0.716148	0.062079	0.0550053
44.4	0.723063	0.0650547	0.0526442
44.44	0.733239	0.0690549	0.0549152
44.49	0.74671	0.074063	0.0545798
44.54	0.760074	0.0790775	0.0555062
44.57	0.767902	0.0820605	0.0538693
44.62	0.780709	0.0870532	0.0556124
44.66	0.788973	0.0910595	0.0573381
44.71	0.801316	0.096063	0.0575145
44.74	0.807744	0.0990689	0.0564754
44.79	0.819229	0.10405	0.0569228
44.84	0.831693	0.109066	0.0557498
44.87	0.839456	0.11205	0.0588595
44.91	0.852497	0.116058	0.0582192
44.96	0.868982	0.121054	0.0578283
45.01	0.889882	0.126055	0.0574119
45.04	0.90125	0.129061	0.057871
45.09	0.918647	0.134039	0.0580619
45.13	0.93389	0.138053	0.0586782
45.16	0.943114	0.141038	0.0575573
45.21	0.962769	0.146055	0.0580877
45.26	0.986052	0.151032	0.0584064
45.3	1.00645	0.155039	0.0622852
45.34	1.02913	0.15903	0.0620537
45.38	1.0544	0.163035	0.0619166
45.43	1.08861	0.168037	0.0632095
45.48	1.1217	0.173128	0.0629462
45.51	1.14435	0.176113	0.0650785
45.55	1.17538	0.180125	0.0638255
45.6	1.21611	0.185128	0.0623972
45.63	1.23925	0.188127	0.0638616
45.68	1.28432	0.193124	0.0611261
45.73	1.32597	0.198125	0.0626991
45.77	1.35844	0.202122	0.0619566
45.8	1.38145	0.205126	0.0644485
45.85	1.42009	0.210136	0.0635632
45.9	1.4501	0.215131	0.061202
45.94	1.47148	0.219119	0.0633496
45.98	1.48775	0.223135	0.063176
46.02	1.49546	0.227133	0.065398
46.07	1.50254	0.232121	0.0667286
46.1	1.49927	0.235119	0.063664
46.15	1.48681	0.240119	0.0661372
46.19	1.47304	0.244122	0.0669285
46.24	1.44566	0.249126	0.0660871
46.27	1.42614	0.252132	0.0664488
46.32	1.38878	0.257146	0.0657267
46.37	1.35001	0.262125	0.0683058
46.4	1.32337	0.265105	0.0701371
46.44	1.29122	0.269129	0.0678651
46.49	1.25422	0.274118	0.0674625
46.54	1.21716	0.27912	0.0671875
46.57	1.1976	0.282118	0.0688479
46.62	1.16828	0.28712	0.0691028
46.66	1.14895	0.291125	0.0699147
46.71	1.12368	0.29614	0.0675485
46.74	1.11459	0.299124	0.0690249
46.79	0.748593	0.29621	0.0667225
46.84	0.547242	0.291202	0.0663023
46.87	0.462994	0.288219	0.0673959
46.91	0.366161	0.284175	0.0688231
46.96	0.278287	0.279166	0.0701149
47.01	0.21316	0.274178	0.067513
47.04	0.179486	0.271178	0.0685923
47.09	0.132169	0.26619	0.0690331
47.13	0.101448	0.26219	0.0679238
47.18	0.0686256	0.257203	0.0648494
47.21	0.0499428	0.254197	0.0639785
47.26	0.0224206	0.249203	0.0677738
47.3	0.00298968	0.245195	0.066497
47.34	-0.0140487	0.241191	0.0649879
47.38	-0.0307342	0.237192	0.063785
47.43	-0.048665	0.232209	0.0624895
47.48	-0.0642918	0.227209	0.0612476
47.51	-0.0736431	0.22422	0.0624648
47.55	-0.0867114	0.22022	0.0628724
47.6	-0.099809	0.215229	0.0634066
47.63	-0.107591	0.212229	0.0635409
47.68	-0.118177	0.207206	0.0618923
47.73	-0.130359	0.202198	0.0625325
47.77	-0.138723	0.198227	0.0626789
47.8	-0.14505	0.195215	0.0641085
47.85	-0.155406	0.190217	0.0630617
47.9	-0.163869	0.185205	0.0633626
47.94	-0.170875	0.181228	0.0635948
47.98	-0.176717	0.177222	0.0607231
48.02	-0.183566	0.173223	0.0615878
48.07	-0.191643	0.168226	0.0597352
48.1	-0.196491	0.165226	0.0642752
48.15	-0.203851	0.16023	0.0611229
48.19	-0.210165	0.156237	0.0616393
48.24	-0.216958	0.151219	0.0629373
48.27	-0.220737	0.148228	0.062756
48.32	-0.227347	0.143215	0.0625372
48.37	-0.232873	0.138224	0.0627461
48.4	-0.236096	0.135222	0.0628426
48.44	-0.241372	0.131223	0.0625188
48.49	-0.247962	0.126224	0.0634754
48.54	-0.254063	0.121237	0.0595656
48.57	-0.257647	0.118224	0.0581333
48.62	-0.264072	0.113214	0.0584303
48.66	-0.267969	0.109219	0.0584302
48.71	-0.273207	0.104203	0.0572273
48.74	-0.277108	0.101216	0.059101
48.79	-0.282167	0.096214	0.0585658
48.84	-0.288879	0.0912145	0.0588206
48.87	-0.291943	0.0882231	0.0589212
48.91	-0.296141	0.0842065	0.0568192
48.96	-0.301768	0.0792264	0.0587524
49.01	-0.307397	0.0742252	0.0579822
49.04	-0.311046	0.0712109	0.0591517
49.09	-0.317463	0.0662234	0.0565614
49.13	-0.322037	0.0622264	0.0564529
49.16	-0.324586	0.0592361	0.0543627
49.21	-0.331004	0.0542345	0.0543143
49.26	-0.336664	0.0492205	0.0557515
49.3	-0.342279	0.0452176	0.0564044
49.34	-0.347307	0.0412241	0.0579026
49.38	-0.352535	0.037224	0.0563576
49.43	-0.358993	0.0322385	0.0554242
49.48	-0.366529	0.0272341	0.054064
49.51	-0.370361	0.0242409	0.0543905
49.55	-0.376691	0.0202322	0.0545806
49.6	-0.384277	0.015235	0.055754
49.65	-0.392241	0.0102347	0.0542482
49.68	-0.396716	0.00723042	0.0558928
49.73	-0.405903	0.00223596	0.0541626
49.77	-0.412998	-0.00176933	0.0532763
49.8	-0.419122	-0.00476315	0.0543202
49.85	-0.428234	-0.00975843	0.0551783
49.9	-0.438849	-0.0147428	0.0541032
49.94	-0.446917	-0.0187548	0.0508196
49.98	-0.455942	-0.0227473	0.0536224
50.02	-0.467128	-0.0267344	0.0510101
50.07	-0.48047	-0.0317554	0.0517875
50.1	-0.489585	-0.0347424	0.0495554
50.15	-0.504356	-0.0397368	0.0510621
50.19	-0.516145	-0.0437257	0.0521156
50.24	-0.533114	-0.0487381	0.0499118
50.27	-0.543556	-0.0517349	0.0504735
50.32	-0.562381	-0.0567375	0.0465069
50.37	-0.583746	-0.0617244	0.0485682
50.4	-0.598091	-0.0647247	0.0495201
50.44	-0.618977	-0.0687403	0.0486292
50.49	-0.645864	-0.0737214	0.0501977
50.54	-0.676665	-0.0787243	0.0459242
50.57	-0.696515	-0.0817221	0.045188
50.62	-0.73198	-0.0867113	0.0488659
50.66	-0.761938	-0.0907027	0.0479854
50.71	-0.804624	-0.0957016	0.0467817
50.74	-0.832877	-0.0986981	0.0445979
50.79	-0.882992	-0.103692	0.0441673
50.84	-0.93781	-0.108686	0.044017
50.88	-0.986799	-0.112694	0.0471966
50.91	-1.02548	-0.115684	0.0436845
50.96	-1.09425	-0.120663	0.0462014
51.01	-1.16035	-0.125748	0.0436287
51.04	-1.20599	-0.128766	0.0440239
51.09	-1.2781	-0.133756	0.0417141
51.13	-1.33322	-0.137765	0.0423997
51.16	-1.37303	-0.140755	0.0414918
51.21	-1.43877	-0.145769	0.0432728
51.26	-1.49719	-0.150771	0.0452342
51.3	-1.54338	-0.154766	0.0408305
51.34	-1.58289	-0.158761	0.0423579
51.38	-1.61598	-0.162753	0.0446302
51.43	-1.65037	-0.16776	0.0450597
51.48	-1.68104	-0.172764	0.0430568
51.51	-1.69458	-0.175764	0.040311
51.55	-1.7098	-0.179739	0.0421302
51.6	-1.71929	-0.184751	0.0383508
51.63	-1.72394	-0.187753	0.0392978
51.68	-1.72356	-0.192766	0.0428465
51.73	-1.71785	-0.197771	0.0441934
51.77	-1.70948	-0.201756	0.041897
51.8	-1.69779	-0.20476	0.0425036
51.85	-1.68026	-0.209746	0.0421239
51.9	-1.656	-0.214766	0.0408644
51.94	-1.63535	-0.218748	0.0413428
51.98	-1.61355	-0.222764	0.0386687
52.02	-1.59214	-0.226757	0.0413452
52.07	-1.5637	-0.231763	0.0395239
52.1	-1.54705	-0.234759	0.0410999
52.15	-1.5225	-0.239764	0.0416731
52.19	-1.50397	-0.243766	0.0419469
52.24	-1.48206	-0.24876	0.0408223
52.27	-1.47077	-0.251773	0.041216
52.32	-1.4522	-0.256768	0.0418217
52.37	-1.44067	-0.261769	0.0381761
52.41	-1.42606	-0.265765	0.037977
52.44	-1.41871	-0.26876	0.0384381
52.49	-1.40886	-0.273783	0.0387192
52.54	-1.39976	-0.278761	0.0392389
52.57	-1.39576	-0.281776	0.0363299
52.62	-1.38502	-0.286772	0.0370055
52.66	-1.37879	-0.290776	0.0392996
52.71	-1.37565	-0.295767	0.0413662
52.74	-1.37418	-0.298763	0.0397835
52.79	-0.761354	-0.29587	0.040202
52.84	-0.42747	-0.290872	0.0431816
52.87	-0.295561	-0.287866	0.0434844
52.91	-0.166235	-0.283872	0.042826
52.96	-0.0531346	-0.278885	0.0444932
53.01	0.0359111	-0.273874	0.0454144
53.04	0.0718176	-0.270865	0.0396783
53.09	0.119338	-0.26588	0.0409442
53.13	0.150443	-0.261878	0.0402943
53.18	0.185184	-0.256869	0.0419355
53.21	0.20109	-0.253867	0.0444561
53.26	0.226575	-0.248873	0.0468207
53.3	0.244282	-0.244869	0.044653
53.34	0.258596	-0.240873	0.0438174
53.38	0.273636	-0.236885	0.0418669
53.43	0.290778	-0.231884	0.0440439
53.48	0.305531	-0.226893	0.0423372
53.51	0.314132	-0.223878	0.0419593
53.55	0.323666	-0.219884	0.0415948
53.6	0.334511	-0.214899	0.0432721
53.63	0.342561	-0.2119	0.0445463
53.68	0.354062	-0.206891	0.0464012
53.73	0.364398	-0.201891	0.0426561
53.77	0.371335	-0.197893	0.0437438
53.8	0.376037	-0.194894	0.0436542
53.85	0.384513	-0.189898	0.0461518
53.9	0.392322	-0.18489	0.044898
53.94	0.398488	-0.180886	0.0415341
53.98	0.404824	-0.176879	0.0427296
54.02	0.410099	-0.172877	0.0450758
54.07	0.417354	-0.167905	0.0458911
54.1	0.420838	-0.164904	0.0452168
54.15	0.427015	-0.159902	0.0480056
54.2	0.432097	-0.154908	0.0446503
54.24	0.43873	-0.150898	0.0444632
54.27	0.440859	-0.147901	0.0480884
54.32	0.44624	-0.142889	0.0475436
54.37	0.451525	-0.137905	0.0470063
54.41	0.456806	-0.133898	0.0474078
54.45	0.460446	-0.129896	0.0494928
54.49	0.465111	-0.125903	0.0477944
54.54	0.470332	-0.120898	0.0469042
54.57	0.472403	-0.117894	0.0495458
54.62	0.476971	-0.112897	0.0479962
54.66	0.481185	-0.108908	0.050731
54.71	0.485943	-0.103891	0.0483399
54.74	0.48778	-0.100921	0.0472267
54.79	0.492113	-0.0958967	0.0500197
54.84	0.496984	-0.0909062	0.051774
54.87	0.499131	-0.0879024	0.0510564
54.91	0.503505	-0.0838988	0.049981
54.96	0.509037	-0.0789	0.0521287
55.01	0.513259	-0.07391	0.0520531
55.04	0.516598	-0.0709086	0.0511261
55.09	0.521707	-0.0659027	0.0484893
55.13	0.52351	-0.0619085	0.0478594
55.16	0.527531	-0.05891	0.0524235
55.21	0.531047	-0.0539091	0.0521654
55.26	0.535449	-0.0489	0.0542601
55.3	0.536893	-0.0449007	0.053033
55.34	0.541567	-0.0409025	0.0532853
55.38	0.545758	-0.0369232	0.0545063
55.43	0.551984	-0.0319024	0.0540449
55.48	0.556834	-0.0269066	0.0558193
55.51	0.559881	-0.0239161	0.0550978
55.55	0.564228	-0.0199083	0.0560594
55.6	0.57015	-0.0149103	0.0543062
55.63	0.574077	-0.0119243	0.0547349
55.68	0.579468	-0.00691972	0.0572592
55.73	0.586031	-0.00192523	0.0570128
55.77	0.591167	0.0020706	0.0566494
55.8	0.595901	0.00507356	0.0578976
55.85	0.603365	0.0100672	0.0587298
55.9	0.612676	0.0150748	0.0566276
55.95	0.620825	0.0200704	0.0562504
55.98	0.626895	0.0230947	0.054404
56.02	0.633555	0.0270724	0.0582613
56.07	0.641499	0.0320697	0.0582217
56.1	0.648043	0.0350726	0.0553091
56.15	0.65722	0.0400775	0.0552204
56.2	0.668488	0.0450597	0.0555881
56.24	0.67853	0.0490692	0.0566617
56.27	0.683636	0.0520876	0.0567964
56.32	0.694318	0.0570848	0.056116
56.37	0.705086	0.0620849	0.0569793
56.4	0.712317	0.0650806	0.0583051
56.45	0.724209	0.0700614	0.0597244
56.49	0.735759	0.0740694	0.0593803
56.54	0.748382	0.0790732	0.0579836
56.57	0.755568	0.0820692	0.0572204
56.62	0.769333	0.0870524	0.0592503
56.66	0.780215	0.0910705	0.0571935
56.71	0.791757	0.0960575	0.0578049
56.74	0.798759	0.0990608	0.0594798
56.79	0.809438	0.104056	0.0601614
56.84	0.820115	0.109059	0.0601524
56.87	0.828185	0.112065	0.0610136
56.91	0.840376	0.11605	0.0596591
56.96	0.857477	0.12105	0.0601999
57.01	0.875282	0.126048	0.0596372
57.04	0.88676	0.129055	0.0587783
57.09	0.908811	0.134048	0.0578502
57.13	0.925138	0.138038	0.0618335
57.16	0.936327	0.141055	0.0618349
57.21	0.953101	0.146034	0.0610579
57.26	0.977176	0.151017	0.0617483
57.3	0.997198	0.155028	0.0637779
57.34	1.01984	0.159032	0.0629627
57.38	1.0454	0.163033	0.0636266
57.43	1.07879	0.168048	0.063634
57.48	1.11245	0.173117	0.0641565
57.51	1.13415	0.176133	0.0643502
57.55	1.16599	0.180124	0.06097
57.6	1.2059	0.185137	0.0649525
57.63	1.23049	0.188134	0.063773
57.68	1.27391	0.193122	0.0627048
57.73	1.31274	0.198128	0.0599115
57.77	1.34256	0.202122	0.0631532
57.8	1.36808	0.205143	0.0636035
57.85	1.39596	0.210131	0.0642246
57.9	1.42722	0.215129	0.0634682
57.95	1.44842	0.220128	0.0651564
57.98	1.45495	0.223134	0.0650317
58.02	1.45992	0.227126	0.0652502
58.07	1.45975	0.232121	0.067934
58.1	1.45424	0.235128	0.0661554
58.15	1.43753	0.240126	0.0675238
58.2	1.41363	0.245131	0.0672784
58.24	1.38789	0.249107	0.067685
58.27	1.3684	0.252116	0.0710644
58.32	1.33076	0.257127	0.0690315
58.37	1.29099	0.26215	0.0686377
58.4	1.26579	0.265132	0.0686662
58.45	1.22601	0.270115	0.0698484
58.49	1.19835	0.274118	0.0714543
58.54	1.16427	0.279131	0.0685234
58.57	1.14456	0.282114	0.071822
58.62	1.11892	0.287122	0.0683911
58.66	1.10055	0.291122	0.0723446
58.71	1.08049	0.29611	0.0708595
58.74	1.06869	0.299125	0.0727692
58.79	0.712681	0.296242	0.0679048
58.84	0.517595	0.291255	0.0704276
58.87	0.435713	0.288238	0.0697057
58.91	0.34283	0.284221	0.0699012
58.96	0.258928	0.279202	0.0666037
59.01	0.196224	0.274212	0.0684878
59.04	0.165025	0.271221	0.0701081
59.09	0.120316	0.266238	0.0678448
59.13	0.088754	0.26223	0.0694593
59.16	0.0694643	0.259228	0.0702065
59.21	0.0390412	0.254229	0.0678328
59.26	0.0132212	0.249245	0.0681315
59.3	-0.00648436	0.245241	0.0665879
59.34	-0.0224861	0.24124	0.0672198
59.38	-0.0386944	0.237235	0.0667525
59.43	-0.0558285	0.232246	0.0701984
59.48	-0.0711568	0.227242	0.0663068
59.51	-0.0800963	0.224257	0.0657176
59.55	-0.0924574	0.220253	0.0654411
59.6	-0.105798	0.215254	0.0635373
59.63	-0.112408	0.212259	0.0638588
59.68	-0.123347	0.207265	0.064133
59.73	-0.135173	0.202232	0.0627559
59.77	-0.143607	0.19827	0.0660839
59.8	-0.149525	0.195261	0.0645804
59.85	-0.159202	0.19025	0.0628946
59.9	-0.16801	0.18524	0.0621786
59.95	-0.175908	0.180258	0.0613192
59.98	-0.180789	0.177251	0.0611304
60.02	-0.187494	0.173248	0.0618114
60.07	-0.195361	0.168259	0.064326
60.1	-0.199607	0.165257	0.0611159
60.15	-0.20686	0.160266	0.0615257
60.2	-0.214238	0.155267	0.0625263
60.24	-0.218653	0.151262	0.0616485
60.27	-0.223065	0.148255	0.0635632
60.32	-0.229189	0.143268	0.0640546
60.37	-0.235293	0.138264	0.0634258
60.41	-0.24014	0.13427	0.0648086
60.45	-0.245394	0.130258	0.0628661
60.49	-0.250903	0.126254	0.0616826
60.54	-0.256124	0.121263	0.0621179
60.57	-0.260227	0.118268	0.0647378
60.62	-0.265704	0.113276	0.0625713
60.66	-0.27047	0.109268	0.0592081
60.71	-0.275851	0.104251	0.0606205
60.74	-0.278552	0.101261	0.0578178
60.79	-0.283941	0.0962564	0.0593151
60.84	-0.290062	0.0912728	0.0595284
60.87	-0.293438	0.0882683	0.0592542
60.91	-0.297717	0.0842419	0.0576983
60.96	-0.304086	0.0792638	0.0604536
61.01	-0.309832	0.0742603	0.0560714
61.04	-0.312688	0.0712703	0.0610149
61.09	-0.319139	0.0662629	0.0595477
61.13	-0.323852	0.062286	0.0570114
61.16	-0.326457	0.0592631	0.0596526
61.21	-0.332853	0.0542707	0.0580821
61.26	-0.338287	0.0492774	0.0555569
61.3	-0.343728	0.0452703	0.0594258
61.34	-0.346987	0.0412814	0.0571979
61.38	-0.354472	0.0372779	0.0577418
61.43	-0.360404	0.032275	0.0578055
61.48	-0.367692	0.0272632	0.0595492
61.51	-0.371771	0.0242805	0.0570925
61.55	-0.377996	0.0202915	0.0587641
61.6	-0.384735	0.0152858	0.0558622
61.63	-0.389237	0.0122673	0.0591268
61.68	-0.397514	0.00726169	0.0552541
61.73	-0.406348	0.00225361	0.0589499
61.77	-0.413484	-0.00173642	0.0558676
61.8	-0.419554	-0.00473635	0.0556175
61.85	-0.429438	-0.00973694	0.0561022
61.9	-0.438901	-0.0147198	0.0554265
61.95	-0.448753	-0.0196964	0.0522446
61.98	-0.455942	-0.0227125	0.0545779
62.02	-0.467095	-0.0266978	0.0552715
62.07	-0.479911	-0.0317087	0.0559206
62.1	-0.488338	-0.0346969	0.0525124
62.15	-0.502037	-0.0397032	0.05238
62.2	-0.515689	-0.04469	0.0504774
62.24	-0.528002	-0.048696	0.0519969
62.27	-0.540626	-0.051703	0.0517326
62.32	-0.559416	-0.0567036	0.0518565
62.37	-0.580548	-0.0616919	0.0503916
62.4	-0.595521	-0.0646864	0.0503469
62.45	-0.620345	-0.0696871	0.0513833
62.49	-0.640766	-0.0736904	0.0490952
62.54	-0.66982	-0.0786858	0.0490161
62.57	-0.688565	-0.0816888	0.0497887
62.62	-0.723081	-0.0866756	0.049429
62.66	-0.752797	-0.0906599	0.0496081
62.71	-0.793075	-0.0956482	0.0469406
62.74	-0.820124	-0.0986652	0.0472425
62.79	-0.867684	-0.103644	0.0491657
62.84	-0.919715	-0.108632	0.0466158
62.87	-0.955936	-0.111635	0.049391
62.91	-1.00406	-0.115646	0.0467855
62.96	-1.07013	-0.12063	0.0446919
63.01	-1.1367	-0.125703	0.0434742
63.04	-1.17498	-0.128711	0.0461103
63.09	-1.24426	-0.133717	0.045614
63.13	-1.30018	-0.137724	0.0427085
63.16	-1.34131	-0.140713	0.0444803
63.21	-1.40596	-0.145726	0.0435222
63.26	-1.4647	-0.150727	0.0433012
63.3	-1.50723	-0.154718	0.0428386
63.34	-1.54501	-0.158733	0.0456322
63.38	-1.58001	-0.162736	0.0491673
63.43	-1.61661	-0.167729	0.0473749
63.48	-1.64487	-0.172705	0.0440471
63.51	-1.65831	-0.175721	0.0445218
63.55	-1.67549	-0.179723	0.0444566
63.6	-1.68578	-0.184716	0.0438503
63.63	-1.69013	-0.18773	0.0458857
63.68	-1.68908	-0.192712	0.0455797
63.73	-1.68503	-0.197728	0.0427653
63.77	-1.67705	-0.201707	0.0441038
63.8	-1.66897	-0.204725	0.0438472
63.85	-1.65003	-0.209715	0.0452236
63.9	-1.62734	-0.214734	0.0441099
63.95	-1.60362	-0.219715	0.0442114
63.98	-1.58929	-0.222722	0.0429023
64.02	-1.56554	-0.226724	0.0431406
64.07	-1.54178	-0.231734	0.0454339
64.1	-1.52567	-0.234727	0.0444238
64.15	-1.49998	-0.239716	0.0410224
64.2	-1.47779	-0.24472	0.0456841
64.24	-1.45891	-0.24872	0.0418753
64.27	-1.45041	-0.251734	0.0401474
64.32	-1.43069	-0.256727	0.0400233
64.37	-1.41471	-0.261708	0.0428359
64.4	-1.40722	-0.264737	0.0433483
64.45	-1.3934	-0.269719	0.0425008
64.49	-1.38291	-0.273737	0.0403403
64.54	-1.37284	-0.278727	0.0424806
64.57	-1.36659	-0.281735	0.0397563
64.62	-1.35956	-0.286718	0.0427915
64.66	-1.35423	-0.290731	0.0414245
64.71	-1.34905	-0.295745	0.0431213
64.74	-1.34647	-0.298729	0.0434197
64.79	-0.737823	-0.295864	0.0408979
64.84	-0.414522	-0.290869	0.0441423
64.87	-0.283322	-0.287878	0.0419525
64.91	-0.160759	-0.283861	0.043868
64.96	-0.049182	-0.278864	0.0417224
65.01	0.0362227	-0.273864	0.0431285
65.04	0.0708527	-0.270874	0.0451921
65.09	0.119173	-0.265894	0.0432135
65.13	0.147573	-0.261886	0.0437625
65.18	0.181184	-0.256881	0.0467348
65.21	0.198009	-0.253876	0.0441398
65.26	0.222556	-0.248898	0.0470172
65.3	0.240093	-0.244889	0.0442383
65.34	0.255501	-0.240889	0.0420815
65.38	0.268178	-0.23689	0.0447979
65.43	0.286637	-0.231893	0.0439804
65.48	0.301009	-0.226916	0.0467014
65.51	0.30921	-0.223895	0.045056
65.55	0.320106	-0.219897	0.046828
65.6	0.331908	-0.214909	0.0454015
65.65	0.341689	-0.209909	0.0436521
65.68	0.349058	-0.206915	0.0462001
65.73	0.359827	-0.201887	0.0483825
65.77	0.367636	-0.19789	0.0449384
65.8	0.37208	-0.194897	0.0461506
65.85	0.379706	-0.189896	0.0445559
65.9	0.386836	-0.184899	0.04692
65.95	0.395522	-0.179898	0.0473209
65.98	0.400308	-0.176915	0.0465048
66.02	0.40609	-0.172899	0.0479837
66.07	0.412311	-0.167913	0.0475724
66.1	0.415872	-0.16491	0.046173
66.15	0.423178	-0.159914	0.0495788
66.2	0.428621	-0.154921	0.0477699
66.24	0.433959	-0.150908	0.0459099
66.27	0.436617	-0.14791	0.0474925
66.32	0.442421	-0.142904	0.0474784
66.37	0.447163	-0.137915	0.0483372
66.41	0.450447	-0.133913	0.0492145
66.45	0.456043	-0.129906	0.0523454
66.49	0.460393	-0.12593	0.0485619
66.54	0.464797	-0.12092	0.052069
66.57	0.467855	-0.11792	0.0501378
66.62	0.472617	-0.112917	0.052586
66.66	0.476086	-0.108928	0.0515662
66.71	0.479671	-0.103888	0.0536106
66.74	0.483169	-0.100905	0.0518879
66.79	0.487789	-0.0959193	0.0534412
66.84	0.491918	-0.0908977	0.0509357
66.87	0.494476	-0.0879124	0.0541371
66.91	0.498094	-0.0839117	0.0531037
66.96	0.503317	-0.078928	0.05382
67.01	0.507126	-0.0739306	0.0557389
67.04	0.510997	-0.0709281	0.0538621
67.09	0.51606	-0.0659204	0.0533456
67.13	0.518194	-0.0619302	0.0518812
67.18	0.523291	-0.0569208	0.0543259
67.21	0.526201	-0.0539244	0.0557889
67.26	0.530621	-0.0489315	0.0548299
67.3	0.532858	-0.0449221	0.0536365
67.34	0.536807	-0.0409184	0.056818
67.38	0.540141	-0.0369148	0.0561834
67.43	0.544703	-0.0319236	0.0567013
67.48	0.550703	-0.0269208	0.053857
67.51	0.554351	-0.0239356	0.0549149
67.55	0.558674	-0.0199356	0.0573536
67.6	0.564159	-0.0149294	0.0573533
67.63	0.567725	-0.0119383	0.0575273
67.68	0.573562	-0.0069405	0.0556781
67.73	0.579883	-0.00194197	0.0581583
67.77	0.585445	0.00205897	0.0565738
67.8	0.589775	0.00506076	0.0574929
67.85	0.596271	0.0100459	0.0567754
67.9	0.605376	0.0150632	0.0593368
67.95	0.614545	0.0200684	0.0593368
67.98	0.619189	0.023067	0.0560572
68.02	0.626434	0.0270625	0.0568082
68.07	0.635587	0.0320703	0.0579624
68.1	0.640591	0.0350702	0.0568408
68.15	0.650051	0.0400739	0.0567776
68.2	0.659846	0.0450558	0.0576356
68.24	0.669303	0.0490466	0.0554938
68.27	0.676457	0.0520819	0.0554939
68.34	0.689887	0.059058	0.0554937
68.37	0.696576	0.0620599	0.0571492
68.41	0.705398	0.0660521	0.0615392
68.45	0.71451	0.0700444	0.0594811
68.49	0.724746	0.0740392	0.0601221
68.54	0.737552	0.0790479	0.0620154
68.57	0.745284	0.0820426	0.057886
68.62	0.758817	0.0870367	0.0613375
68.66	0.769014	0.0910252	0.0604299
68.71	0.781918	0.0960342	0.0599837
68.74	0.78947	0.0990485	0.0622263
68.79	0.801355	0.104035	0.0571779
68.84	0.811559	0.109046	0.0614986
68.87	0.81878	0.11204	0.0597119
68.91	0.829177	0.116029	0.0616803
68.96	0.845031	0.121036	0.0631755
69.01	0.8624	0.126012	0.0601515
69.04	0.873307	0.129037	0.0622856
69.09	0.895113	0.134027	0.0638869
69.13	0.912957	0.138036	0.0651378
69.18	0.934208	0.143011	0.0632787
69.21	0.946733	0.146027	0.0634695
69.26	0.968101	0.151009	0.0645482
69.3	0.988063	0.155024	0.0637581
69.34	1.00987	0.159027	0.063389
69.38	1.03381	0.163006	0.0643004
69.43	1.06773	0.168031	0.0614631
69.48	1.10454	0.173038	0.0653278
69.51	1.12114	0.176107	0.0657906
69.55	1.15184	0.180095	0.0665473
69.6	1.19291	0.185107	0.0649079
69.63	1.21655	0.18811	0.0641968
69.68	1.25711	0.193102	0.0631257
69.73	1.2955	0.198099	0.064218
69.77	1.32535	0.202101	0.06533
69.82	1.3582	0.207108	0.0659974
69.85	1.37374	0.2101	0.0673771
69.9	1.3989	0.215125	0.0675402
69.95	1.41637	0.220113	0.0690999
69.98	1.42075	0.223098	0.0680642
70.02	1.42574	0.227107	0.0705877
70.07	1.42214	0.232107	0.0701101
70.1	1.41518	0.235104	0.0676438
70.15	1.3956	0.240097	0.0668703
70.2	1.36951	0.245102	0.0691711
70.24	1.34424	0.249106	0.0709523
70.27	1.3211	0.2521	0.0712967
70.32	1.28691	0.257104	0.0717508
70.37	1.24731	0.262092	0.0744953
70.41	1.21503	0.266101	0.0715518
70.45	1.18566	0.270112	0.0722395
70.49	1.15913	0.274109	0.070237
70.54	1.12709	0.279094	0.0710434
70.57	1.11176	0.282111	0.0719393
70.62	1.08396	0.287113	0.0694487
70.66	1.06628	0.291115	0.0742297
70.71	1.0488	0.296109	0.068736
70.74	1.03868	0.299101	0.0720999
70.79	0.686281	0.296279	0.0711058
70.84	0.494547	0.29126	0.0709632
70.88	0.392779	0.287286	0.0708361
70.91	0.333421	0.284264	0.07347
70.96	0.244331	0.279228	0.0726666
71.01	0.184144	0.274243	0.0727257
71.04	0.15335	0.271241	0.0694661
71.09	0.110945	0.266251	0.0711812
71.13	0.0804628	0.262247	0.0705134
71.18	0.0475102	0.257255	0.0689882
71.21	0.0312607	0.254219	0.0716486
71.26	0.00656346	0.249256	0.0694503
71.3	-0.0109279	0.245275	0.069263
71.34	-0.0278111	0.241245	0.0684134
71.38	-0.0433903	0.237253	0.0687869
71.43	-0.0599676	0.23226	0.0677874
71.48	-0.0761354	0.227271	0.0659089
71.51	-0.0855586	0.224252	0.0674968
71.55	-0.0964539	0.220255	0.0701434
71.6	-0.108893	0.215278	0.0686422
71.63	-0.11669	0.21226	0.0679474
71.68	-0.127914	0.207276	0.0667412
71.73	-0.138274	0.202262	0.0675217
71.77	-0.146473	0.19828	0.0643441
71.8	-0.15275	0.195284	0.0651145
71.85	-0.162095	0.190261	0.0657668
71.9	-0.169919	0.185272	0.0659502
71.95	-0.178827	0.180269	0.0652458
71.98	-0.183998	0.177271	0.0630959
72.02	-0.189299	0.173267	0.0659711
72.07	-0.197738	0.168261	0.0628089
72.1	-0.202275	0.165268	0.0656606
72.15	-0.209033	0.160275	0.0614264
72.2	-0.216379	0.155278	0.0629318
72.24	-0.221627	0.151272	0.0662918
72.27	-0.224313	0.148276	0.0666864
72.32	-0.231559	0.143269	0.0647548
72.37	-0.236715	0.138281	0.0645202
72.41	-0.242982	0.134286	0.0639054
72.45	-0.246882	0.130287	0.0631853
72.49	-0.252149	0.126285	0.0648484
72.54	-0.257487	0.121277	0.0637664
72.57	-0.261465	0.118283	0.0631339
72.62	-0.267093	0.113284	0.062691
72.66	-0.271765	0.109292	0.0607579
72.71	-0.277737	0.10428	0.0631027
72.74	-0.281082	0.10128	0.0637818
72.79	-0.284814	0.0962835	0.0645305
72.84	-0.291802	0.0912785	0.063865
72.87	-0.294196	0.0882905	0.0609413
72.91	-0.299823	0.0842717	0.0582917
72.96	-0.305221	0.0792736	0.0602817
73.01	-0.311171	0.0742796	0.0614022
73.04	-0.314772	0.0712859	0.0600792
73.09	-0.319937	0.0662979	0.0588876
73.13	-0.324967	0.0622932	0.0613201
73.16	-0.328239	0.0592893	0.0607846
73.21	-0.334256	0.0542837	0.0610477
73.26	-0.339388	0.049284	0.0581571
73.3	-0.344868	0.0452673	0.0578364
73.34	-0.348995	0.0412868	0.0604962
73.38	-0.354689	0.0372856	0.0584892
73.43	-0.361766	0.0322968	0.0578809
73.48	-0.368955	0.0272729	0.0576404
73.51	-0.372392	0.0242934	0.0578196
73.55	-0.377841	0.020287	0.0613083
73.6	-0.384949	0.0152954	0.0578932
73.63	-0.389818	0.0123001	0.0604024
73.68	-0.398169	0.00728686	0.0591514
73.73	-0.406034	0.00232011	0.0569465
73.77	-0.413244	-0.00171247	0.0580877
73.8	-0.419097	-0.00470548	0.0580509
73.85	-0.428907	-0.00969791	0.0580489
73.9	-0.439141	-0.0146949	0.0572203
73.95	-0.448805	-0.0196905	0.0551949
73.98	-0.456748	-0.0226895	0.0588113
74.02	-0.465962	-0.026676	0.0547459
74.07	-0.477979	-0.0316871	0.0540807
74.1	-0.485646	-0.0346816	0.0551452
74.15	-0.497535	-0.0396771	0.0540412
74.2	-0.514779	-0.044668	0.0537676
74.24	-0.527606	-0.048677	0.0540491
74.27	-0.537521	-0.0516856	0.0558898
74.32	-0.558102	-0.0566785	0.052631
74.37	-0.577794	-0.061677	0.0554527
74.4	-0.592474	-0.0646792	0.051148
74.45	-0.616478	-0.0696862	0.0502783
74.49	-0.636286	-0.0736682	0.0504092
74.54	-0.665989	-0.078673	0.0520178
74.57	-0.684091	-0.0816629	0.0511524
74.62	-0.715937	-0.0866629	0.0511094
74.66	-0.74514	-0.0906435	0.0520921
74.71	-0.784723	-0.09565	0.0490824
74.74	-0.810083	-0.0986523	0.0499007
74.79	-0.856744	-0.103656	0.0499384
74.84	-0.907347	-0.108639	0.049691
74.88	-0.952869	-0.112638	0.0495794
74.91	-0.988034	-0.11563	0.0504751
74.96	-1.05035	-0.120625	0.0488906
75.01	-1.11863	-0.12567	0.0501968
75.05	-1.16481	-0.129719	0.0466465
75.09	-1.22007	-0.133699	0.0434433
75.13	-1.27494	-0.137718	0.044688
75.16	-1.31311	-0.140705	0.0451938
75.21	-1.3769	-0.145724	0.0450139
75.26	-1.433	-0.150719	0.0426494
75.3	-1.47501	-0.154709	0.0453314
75.34	-1.51273	-0.158726	0.0463177
75.38	-1.54698	-0.162716	0.0426083
75.43	-1.58284	-0.167728	0.042073
75.48	-1.61025	-0.172726	0.0428973
75.51	-1.62467	-0.175714	0.0475671
75.55	-1.63794	-0.179715	0.0441027
75.6	-1.64889	-0.184706	0.0465636
75.65	-1.6538	-0.189703	0.0460531
75.68	-1.65541	-0.192723	0.0454659
75.73	-1.64855	-0.197713	0.0452301
75.77	-1.64006	-0.201707	0.0454727
75.8	-1.63411	-0.204729	0.0440914
75.85	-1.61817	-0.209725	0.0455075
75.9	-1.59749	-0.21472	0.0474692
75.95	-1.57293	-0.219715	0.0423773
75.98	-1.56002	-0.222729	0.0448591
76.02	-1.54012	-0.226736	0.0448134
76.07	-1.51541	-0.231731	0.0433802
76.1	-1.49949	-0.234732	0.0458766
76.15	-1.47594	-0.239711	0.0425688
76.2	-1.45317	-0.244718	0.0427482
76.24	-1.43547	-0.248712	0.0427537
76.27	-1.4236	-0.251705	0.0428616
76.32	-1.40643	-0.256725	0.0428422
76.37	-1.39172	-0.261721	0.0433137
76.41	-1.38237	-0.265737	0.0460316
76.45	-1.3691	-0.269741	0.0469251
76.49	-1.3598	-0.273725	0.0459467
76.54	-1.3485	-0.278724	0.0425847
76.57	-1.34307	-0.28173	0.0433297
76.62	-1.33493	-0.286711	0.0443985
76.66	-1.32812	-0.290733	0.047257
76.71	-1.32386	-0.295719	0.0467012
76.74	-1.32041	-0.298723	0.0430463
76.79	-0.720824	-0.295886	0.0424482
76.84	-0.402269	-0.290912	0.0432131
76.87	-0.275792	-0.287914	0.0442309
76.91	-0.155267	-0.283919	0.0451265
76.96	-0.0457028	-0.278904	0.0438006
77.01	0.0353182	-0.273897	0.0478505
77.04	0.0722687	-0.270909	0.0446554
77.09	0.117802	-0.265919	0.0440088
77.13	0.147568	-0.261906	0.0476975
77.18	0.17978	-0.256928	0.0468301
77.21	0.195542	-0.253909	0.041614
77.26	0.219456	-0.248924	0.0443463
77.3	0.238546	-0.244934	0.046072
77.34	0.253352	-0.240929	0.0469816
77.38	0.266944	-0.236944	0.0461516
77.43	0.284284	-0.231919	0.0471233
77.48	0.296957	-0.226949	0.0476298
77.51	0.305968	-0.22392	0.0455558
77.55	0.316748	-0.21993	0.048139
77.6	0.329018	-0.214924	0.0472492
77.63	0.335739	-0.211934	0.0473819
77.68	0.345255	-0.20693	0.0432815
77.73	0.354701	-0.201913	0.0455075
77.77	0.362771	-0.197937	0.0451407
77.8	0.367991	-0.194931	0.048492
77.85	0.377342	-0.189931	0.0496595
77.9	0.384962	-0.184947	0.0502089
77.95	0.392762	-0.179936	0.0524913
77.98	0.397151	-0.176941	0.0514014
78.02	0.403444	-0.172937	0.048503
78.07	0.409672	-0.167944	0.0482014
78.1	0.41201	-0.164934	0.0499859
78.15	0.419137	-0.159957	0.0489973
78.2	0.424	-0.154954	0.0516874
78.24	0.430004	-0.150956	0.048494
78.27	0.433142	-0.147937	0.0495945
78.32	0.440223	-0.142935	0.0472953
78.37	0.443369	-0.137948	0.0513705
78.4	0.447001	-0.134936	0.0519789
78.45	0.451936	-0.129952	0.0499522
78.49	0.455292	-0.125952	0.0528437
78.54	0.459653	-0.120962	0.0509728
78.57	0.463908	-0.117948	0.0528347
78.62	0.468583	-0.112954	0.0561354
78.66	0.471023	-0.108945	0.0518908
78.71	0.475127	-0.103953	0.0519488
78.74	0.478067	-0.100957	0.0535904
78.79	0.484293	-0.0959425	0.0527416
78.84	0.488565	-0.0909379	0.0564543
78.87	0.491465	-0.0879427	0.0536576
78.91	0.494253	-0.0839515	0.0547111
78.96	0.498523	-0.0789537	0.0562803
79.01	0.502193	-0.073935	0.053356
79.04	0.504808	-0.0709488	0.0555313
79.09	0.510432	-0.0659458	0.0554761
79.13	0.513144	-0.0619494	0.0559969
79.18	0.51952	-0.056957	0.0555531
79.21	0.522174	-0.05395	0.0550523
79.26	0.526127	-0.0489504	0.0573598
79.3	0.529401	-0.0449464	0.0592042
79.34	0.532588	-0.0409591	0.0589102
79.38	0.535304	-0.0369484	0.0606756
79.43	0.540508	-0.0319659	0.058694
79.48	0.545634	-0.0269443	0.0606978
79.51	0.548305	-0.0239506	0.0616182
79.55	0.553056	-0.0199471	0.0576641
79.6	0.558765	-0.0149481	0.0594432
79.63	0.561324	-0.0119701	0.0586616
79.68	0.568533	-0.00696679	0.0562378
79.73	0.574444	-0.00196266	0.0606352
79.77	0.58125	0.00203625	0.0586386
79.8	0.58548	0.00504228	0.0580143
79.85	0.591978	0.0100216	0.0598411
79.9	0.599992	0.0150233	0.0569756
79.95	0.607245	0.0200298	0.0575374
79.98	0.612561	0.023042	0.0557113
80.02	0.619349	0.0270266	0.0566895
80.07	0.62844	0.0320254	0.0594705
80.1	0.634399	0.0350313	0.060532
80.15	0.643543	0.040022	0.0592288
80.2	0.652834	0.0450031	0.0603567
80.24	0.66066	0.049034	0.0590207
80.27	0.667569	0.0520337	0.0585613
80.32	0.678709	0.0570302	0.0593847
80.37	0.688476	0.0620244	0.0617746
80.4	0.69546	0.0650169	0.0619916
80.45	0.706359	0.0700312	0.0611198
80.49	0.715436	0.074007	0.0608421
80.54	0.727117	0.0790074	0.0611104
80.57	0.734981	0.0820077	0.0615506
80.62	0.748513	0.0870048	0.0584831
80.66	0.758796	0.0910128	0.0622895
80.71	0.772216	0.0959962	0.0647806
80.74	0.779346	0.0990121	0.0641544
80.79	0.79107	0.103997	0.0621126
80.84	0.802449	0.109002	0.0620105
80.87	0.809533	0.111982	0.0629251
80.91	0.819235	0.116	0.0630116
80.96	0.833498	0.121007	0.0634984
[truncated: 201 more rows]
