# Supplementary material for: Interactions at heterointerfaces influence actuation in wet cast 1T-MoS 2 and V 2 O 5 ·0.5H 2 O thin films
Source: Royal Society of Chemistry journal article supplement (doi:10.1039/d5ta02659h), 2025-01-01
Supplement: d5ta02659h5.xlsx [file d5ta02659h5.xlsx]

## Sheet: V2O5-0.5-H2O-framedata
time (s)	current (mA)	voltage (V)	curvature (cm-1)	Frame
5.001	8.30061e-05	0.319361	0.254102	1
6.002	6.41072e-05	0.319321	0.254499	2
7.035	5.23876e-05	0.319337	0.254205	3
8.038	4.81014e-05	0.319256	0.254156	4
9.004	4.34328e-05	0.319237	0.253798	5
10.001	3.76234e-05	0.319265	0.254416	6
11.008	4.07687e-05	0.319299	0.253981	7
12.173	3.98099e-05	0.319256	0.253945	8
13.012	-0.00514684	0.317213	0.254086	9
14.005	-0.0146908	0.307287	0.254465	10
15.002	-0.019712	0.297317	0.254211	11
15.999	-0.0231381	0.287354	0.254127	12
17.031	-0.0259635	0.277038	0.253475	13
18.004	-0.0282695	0.267304	0.254057	14
19.008	-0.0301078	0.257249	0.253946	15
20.003	-0.0319782	0.247302	0.253396	16
21.003	-0.0336947	0.237306	0.252728	17
22.005	-0.0353687	0.227298	0.252127	18
22.993	-0.0370926	0.21742	0.251306	19
23.993	-0.0385392	0.207417	0.249556	20
24.994	-0.0401594	0.197423	0.250414	21
25.995	-0.0416507	0.187388	0.250495	22
26.996	-0.0431763	0.17741	0.249335	23
27.996	-0.0447405	0.167381	0.248632	24
28.997	-0.0461678	0.157371	0.247553	25
30.014	-0.047698	0.147199	0.247064	26
30.999	-0.0490333	0.137322	0.24662	27
31.999	-0.0505173	0.127342	0.246305	28
32.999	-0.0517425	0.117333	0.246034	29
34	-0.0530014	0.107341	0.244126	30
35	-0.0542963	0.0973373	0.242951	31
36.003	-0.0555119	0.0873216	0.242771	32
37.024	-0.0564712	0.0770925	0.241096	33
37.999	-0.0573644	0.0673725	0.239954	34
39.009	-0.0583861	0.0572652	0.239007	35
40.001	-0.0590114	0.0473529	0.238458	36
41.007	-0.0596991	0.0372834	0.237845	37
42.002	-0.0602752	0.0273241	0.235299	38
43.002	-0.060739	0.0173462	0.235151	39
44.002	-0.0611338	0.00732446	0.23268	40
44.992	-0.0615542	-0.00257932	0.232073	41
46.006	-0.0619133	-0.0126788	0.230159	42
47.008	-0.0622295	-0.0227178	0.228894	43
48.009	-0.062547	-0.0327314	0.227254	44
49.008	-0.0629931	-0.0426821	0.226397	45
50.017	-0.063165	-0.0527792	0.225332	46
51	-0.063411	-0.0626215	0.223523	47
52.005	-0.0636361	-0.0726838	0.222979	48
53.001	-0.0638164	-0.0826453	0.220354	49
54	-0.0639992	-0.0926371	0.218987	50
55.005	-0.0641263	-0.102675	0.217478	51
56.002	-0.0642757	-0.112668	0.216596	52
56.997	-0.0643516	-0.122593	0.214233	53
58.016	-0.0644844	-0.132784	0.213644	54
59.001	-0.0647692	-0.142634	0.211001	55
60.002	-0.0647594	-0.152635	0.209899	56
61.007	-0.0648513	-0.162686	0.208685	57
62.005	-0.0649334	-0.172661	0.207332	58
63.009	-0.0650495	-0.182717	0.204896	59
63.995	-0.0651751	-0.192568	0.203994	60
65.022	-0.0652936	-0.202847	0.202587	61
65.999	-0.0654199	-0.212618	0.200282	62
67.022	-0.065592	-0.222852	0.198253	63
67.998	-0.0657467	-0.232613	0.19745	64
69	-0.0659025	-0.242624	0.194834	65
70.001	-0.0660664	-0.252634	0.193902	66
71.004	-0.0664123	-0.262652	0.190842	67
72.004	-0.0664749	-0.272663	0.18947	68
73.021	-0.0665657	-0.282832	0.187694	69
74.005	-0.0667356	-0.292676	0.185616	70
74.991	-0.0668768	-0.302575	0.18427	71
75.996	-0.0669389	-0.312609	0.181524	72
76.996	-0.0670498	-0.322593	0.18024	73
77.996	-0.0671084	-0.332571	0.178356	74
78.996	-0.067174	-0.342586	0.17684	75
79.996	-0.0672212	-0.352567	0.173433	76
80.996	-0.0674226	-0.362558	0.172281	77
81.996	-0.0673857	-0.372561	0.170099	78
82.996	-0.0674177	-0.382555	0.167771	79
84.013	-0.0674494	-0.392725	0.16579	80
84.997	-0.0674926	-0.40259	0.163616	81
86.013	-0.0674999	-0.412751	0.161428	82
86.997	-0.0673398	-0.422591	0.158996	83
87.997	-0.0674744	-0.432569	0.157331	84
88.997	-0.0674073	-0.442588	0.155027	85
89.997	-0.0672952	-0.452549	0.152464	86
90.998	-0.0671737	-0.462569	0.150964	87
92.014	-0.0670782	-0.472739	0.148983	88
92.998	-0.0669578	-0.482575	0.147046	89
93.998	-0.0668253	-0.492586	0.144277	90
94.998	-0.0666883	-0.502591	0.142853	91
96.002	-0.0664905	-0.512629	0.140759	92
97.002	-0.0664206	-0.522636	0.138674	93
98.002	-0.0661468	-0.532623	0.136822	94
99.003	-0.0659259	-0.542646	0.13438	95
100.004	-0.0656076	-0.552632	0.132565	96
101.02	-0.0656655	-0.562802	0.12996	97
102.004	-0.0653992	-0.572629	0.127312	98
103.008	-0.0651316	-0.582695	0.125684	99
104	-0.0648663	-0.592609	0.124492	100
105.008	-0.0643848	-0.602684	0.121107	101
106.002	-0.0642485	-0.612649	0.11951	102
107.002	-0.0639572	-0.622654	0.117362	103
108.016	-0.0636078	-0.632799	0.114871	104
108.999	-0.063323	-0.642605	0.113025	105
110.004	-0.0629921	-0.652656	0.110591	106
111.007	-0.0626507	-0.662679	0.108943	107
111.998	-0.0622707	-0.672598	0.106956	108
113.007	-0.0618965	-0.682673	0.104063	109
114.014	-0.0615052	-0.692755	0.101936	110
114.996	-0.0611191	-0.70258	0.100163	111
116.001	-0.0607022	-0.712622	0.0989285	112
116.997	-0.0602681	-0.722576	0.0959401	113
118.009	-0.0597592	-0.732713	0.0939468	114
119.013	-0.0593059	-0.742746	0.0918431	115
120.018	-0.0588574	-0.752802	0.0900448	116
121.024	-0.0583102	-0.762844	0.0874592	117
122.015	-0.057838	-0.772753	0.0857983	118
123.032	-0.0573187	-0.782903	0.0836031	119
124.033	-0.0567995	-0.792906	0.0812411	120
125.013	-0.0491449	-0.796444	0.0794746	121
126.01	-0.0385406	-0.78647	0.0773641	122
127.026	-0.0313474	-0.776295	0.0752874	123
128.014	-0.0261358	-0.766418	0.0742508	124
129.022	-0.0216867	-0.75637	0.0734799	125
130.012	-0.0181171	-0.746464	0.0726696	126
131.024	-0.0149473	-0.736371	0.0725825	127
132.033	-0.01216	-0.7263	0.0717181	128
133.019	-0.00971026	-0.716445	0.0723087	129
134.017	-0.00741366	-0.706436	0.0724941	130
135.017	-0.00532228	-0.696448	0.0727114	131
136.015	-0.00328301	-0.686469	0.0730445	132
137.022	-0.00147958	-0.67641	0.0729313	133
138.034	0.000357962	-0.666291	0.0741585	134
139.028	0.00205232	-0.656335	0.0747555	135
140.033	0.00374743	-0.646325	0.0751409	136
141.037	0.0054697	-0.636293	0.0757189	137
142.032	0.0069579	-0.626354	0.0764455	138
143.034	0.00861233	-0.616353	0.0774098	139
144.023	0.010181	-0.606429	0.0780929	140
145.027	0.0116278	-0.596393	0.0791133	141
146.031	0.0131919	-0.586364	0.0803647	142
147.036	0.0146947	-0.576305	0.0818904	143
148.026	0.016246	-0.566384	0.0833383	144
149.047	0.0177488	-0.556223	0.0839541	145
150.036	0.0193089	-0.546313	0.0854896	146
151.025	0.0207134	-0.53644	0.0871679	147
152.03	0.0222706	-0.526386	0.0886595	148
153.035	0.0237056	-0.516337	0.0899812	149
154.024	0.0252071	-0.506482	0.0913438	150
155.138	0.0269417	-0.495295	0.0930861	151
156.036	0.0281235	-0.486337	0.0950702	152
157.026	0.0296164	-0.476422	0.0971263	153
158.047	0.0310569	-0.466215	0.0990562	154
159.036	0.0325531	-0.456319	0.100768	155
160.025	0.0339358	-0.446429	0.102889	156
161.029	0.0354673	-0.436368	0.104469	157
162.034	0.0368338	-0.426349	0.10563	158
163.023	0.0383076	-0.416446	0.108107	159
164.028	0.0396674	-0.406397	0.110441	160
165.033	0.0412279	-0.396354	0.112091	161
166.022	0.0426898	-0.386481	0.114541	162
167.026	0.0439733	-0.376405	0.116446	163
168.031	0.0454848	-0.366354	0.118549	164
169.035	0.0468988	-0.356328	0.120211	165
170.024	0.0484958	-0.346427	0.123498	166
171.029	0.0498805	-0.336369	0.125233	167
172.033	0.0515743	-0.326348	0.126881	168
173.025	0.0529323	-0.316446	0.130425	169
174.029	0.0545947	-0.306388	0.132389	170
175.034	0.0559358	-0.296331	0.13431	171
176.024	0.0574855	-0.286485	0.137074	172
177.03	0.0589433	-0.276399	0.139176	173
178.034	0.0601081	-0.266353	0.141913	174
179.024	0.0614505	-0.25645	0.144095	175
180.028	0.0625268	-0.246399	0.145988	176
181.032	0.0635568	-0.236348	0.149276	177
182.022	0.0645339	-0.226478	0.151246	178
183.027	0.0654942	-0.216431	0.153818	179
184.031	0.0662443	-0.206387	0.156403	180
185.036	0.0669782	-0.196345	0.158651	181
186.031	0.0678198	-0.186369	0.161354	182
187.029	0.0683296	-0.176416	0.162619	183
188.035	0.0688659	-0.16634	0.165028	184
189.023	0.0695222	-0.156455	0.167134	185
190.028	0.0700008	-0.146394	0.169774	186
191.043	0.0704832	-0.136237	0.172244	187
192.022	0.0709396	-0.126443	0.173791	188
193.028	0.0714169	-0.116379	0.176986	189
194.034	0.0719541	-0.106293	0.179073	190
195.023	0.0723859	-0.0964319	0.181233	191
196.029	0.0729571	-0.0863659	0.182733	192
197.034	0.0733621	-0.0763174	0.185058	193
198.025	0.073716	-0.0664309	0.187333	194
199.031	0.0742693	-0.056374	0.188934	195
200.036	0.0744729	-0.0462946	0.19084	196
201.025	0.0746869	-0.0364154	0.192409	197
202.029	0.0749088	-0.026371	0.194447	198
203.034	0.0750883	-0.0163188	0.196538	199
204.025	0.0753018	-0.00639855	0.198192	200
205.03	0.0754313	0.00362313	0.199693	201
206.036	0.0755657	0.0137086	0.201973	202
207.027	0.0756528	0.0236067	0.203503	203
208.046	0.0757249	0.0337816	0.204313	204
209.052	0.0760995	0.0438526	0.206808	205
210.027	0.0759683	0.0536223	0.207706	206
211.032	0.0759563	0.0636648	0.208671	207
212.022	0.0759225	0.0735675	0.211342	208
213.027	0.0758898	0.0836322	0.212311	209
214.033	0.075793	0.0937073	0.213464	210
215.023	0.0754739	0.10361	0.215012	211
216.028	0.0753591	0.11366	0.215511	212
217.048	0.0751687	0.123846	0.217057	213
218.037	0.0749443	0.133763	0.21996	214
219.041	0.0746659	0.143768	0.220793	215
220.046	0.0745207	0.153803	0.222446	216
221.035	0.0744316	0.163696	0.222433	217
222.024	0.0741311	0.173607	0.222803	218
223.028	0.0737131	0.183649	0.223572	219
224.032	0.0736034	0.193722	0.225515	220
225.036	0.0734583	0.203763	0.227266	221
226.025	0.0732873	0.213653	0.227926	222
227.03	0.0731173	0.223702	0.22904	223
228.034	0.0728955	0.233723	0.230359	224
229.023	0.0726724	0.243624	0.231175	225
230.027	0.0724149	0.253655	0.23109	226
231.031	0.0721498	0.263681	0.231749	227
232.035	0.0718609	0.27374	0.233373	228
233.027	0.0715454	0.28365	0.233878	229
234.029	0.0711906	0.293673	0.235037	230
235.035	0.0708245	0.303722	0.235401	231
236.026	0.0704478	0.313652	0.236473	232
237.035	0.0698685	0.323778	0.235802	233
238.023	0.0694106	0.333621	0.237035	234
239.029	0.0689046	0.343696	0.238512	235
240.035	0.0683604	0.353753	0.23803	236
241.025	0.0677765	0.363611	0.239004	237
242.031	0.0671464	0.373689	0.238759	238
243.022	0.0664651	0.383618	0.239513	239
244.028	0.0657671	0.39366	0.240257	240
245.035	0.0649529	0.403753	0.241268	241
246.025	0.0642669	0.413667	0.241681	242
247.033	0.0633704	0.423759	0.242129	243
248.023	0.0626366	0.433639	0.243332	244
249.029	0.0618874	0.4437	0.242745	245
250.035	0.0611199	0.453749	0.244001	246
251.028	0.0603789	0.463691	0.243746	247
252.032	0.0596558	0.473737	0.243435	248
253.036	0.0588806	0.483748	0.24504	249
254.025	0.0583215	0.493652	0.24556	250
255.03	0.0577486	0.5037	0.245505	251
256.033	0.0572418	0.513757	0.246185	252
257.023	0.0566983	0.523671	0.246375	253
258.028	0.0561182	0.533723	0.246439	254
259.033	0.0554794	0.543793	0.247567	255
260.037	0.0546487	0.553812	0.248782	256
261.027	0.0538416	0.563689	0.247338	257
262.031	0.052935	0.573735	0.247658	258
263.037	0.0521067	0.583818	0.248218	259
264.025	0.0512629	0.593684	0.248505	260
265.03	0.0504252	0.603738	0.249027	261
266.035	0.0496402	0.613755	0.250127	262
267.024	0.0488361	0.623675	0.250232	263
268.029	0.0478293	0.633722	0.250256	264
269.034	0.0467692	0.643782	0.250601	265
270.023	0.0455684	0.653715	0.250343	266
271.029	0.0441441	0.663761	0.250863	267
272.033	0.0426803	0.673795	0.251664	268
273.023	0.041305	0.68368	0.252293	269
274.028	0.0398409	0.693741	0.25238	270
275.032	0.0384572	0.703782	0.252095	271
276.037	0.037086	0.713833	0.252154	272
277.025	0.0357077	0.723713	0.253171	273
278.046	0.03436	0.733921	0.2536	274
279.034	0.0331003	0.743795	0.253704	275
280.023	0.031808	0.753701	0.253268	276
281.027	0.030594	0.763736	0.253816	277
282.031	0.029371	0.773788	0.253364	278
283.039	0.0281513	0.783875	0.254321	279
284.023	0.0269696	0.793732	0.25395	280
285.027	0.0258609	0.803749	0.253988	281
286.048	0.024744	0.81397	0.253398	282
287.036	0.0236849	0.823842	0.253915	283
288.025	0.0226272	0.833733	0.253986	284
289.03	0.0216142	0.843764	0.254037	285
290.034	0.0206976	0.853823	0.25381	286
291.023	0.0197338	0.863698	0.253615	287
292.027	0.0188268	0.873738	0.253716	288
293.033	0.017964	0.88384	0.253861	289
294.022	0.0171611	0.893749	0.253308	290
295.027	0.0163776	0.903782	0.25386	291
296.032	0.0156245	0.913825	0.253366	292
297.036	0.0149434	0.92386	0.252895	293
298.026	0.0143148	0.933757	0.25364	294
299.049	0.0136988	0.943975	0.253264	295
300.023	0.0131263	0.953698	0.253633	296
301.029	0.012602	0.963769	0.254157	297
302.035	0.0121187	0.973847	0.253432	298
303.024	0.0116753	0.983744	0.253758	299
304.029	0.0112537	0.993784	0.254032	300
305.034	0.00957081	0.996977	0.25349	301
306.023	0.00782563	0.987084	0.253819	302
307.027	0.006701	0.977025	0.253843	303
308.033	0.0058283	0.966986	0.253283	304
309.024	0.0051108	0.957053	0.253337	305
310.031	0.00445962	0.946974	0.253974	306
311.036	0.00387281	0.936881	0.252967	307
312.028	0.00335684	0.926949	0.253275	308
313.035	0.00285914	0.916885	0.252985	309
314.025	0.00239547	0.907002	0.253595	310
315.03	0.00194494	0.89696	0.253217	311
316.022	0.00149398	0.887057	0.253109	312
317.028	0.00106741	0.877013	0.253067	313
318.035	0.000632551	0.867005	0.25361	314
319.023	0.000203818	0.857097	0.253446	315
320.028	-0.000243357	0.847047	0.25348	316
321.034	-0.000694601	0.836999	0.253137	317
322.025	-0.00115855	0.82709	0.253495	318
323.031	-0.00163578	0.816981	0.25355	319
324.036	-0.00215325	0.806919	0.252943	320
325.026	-0.00268375	0.797003	0.25333	321
326.047	-0.00329431	0.786815	0.253351	322
327.023	-0.00386586	0.777046	0.25369	323
328.044	-0.00449668	0.766857	0.253539	324
329.036	-0.00514722	0.756947	0.254013	325
330.025	-0.00585503	0.74707	0.253438	326
331.035	-0.006568	0.736967	0.253174	327
332.038	-0.00732694	0.726929	0.252608	328
333.029	-0.00816772	0.717023	0.252759	329
334.041	-0.00899002	0.706864	0.252125	330
335.025	-0.00986278	0.696959	0.252562	331
336.034	-0.0108247	0.686914	0.252831	332
337.024	-0.0117705	0.677033	0.252189	333
338.03	-0.0128084	0.666971	0.252173	334
339.036	-0.0139561	0.656923	0.251625	335
340.027	-0.015117	0.647026	0.252004	336
341.031	-0.0164423	0.636995	0.252078	337
342.036	-0.0178993	0.626903	0.251031	338
343.027	-0.0192899	0.616975	0.251025	339
344.033	-0.0207572	0.606938	0.25039	340
345.024	-0.0222612	0.597032	0.250418	341
346.03	-0.023776	0.586954	0.249383	342
347.036	-0.0250904	0.576914	0.249385	343
348.028	-0.0264395	0.566996	0.248779	344
349.034	-0.0278954	0.556952	0.248191	345
350.023	-0.0292542	0.547063	0.247929	346
351.028	-0.0307989	0.536999	0.246871	347
352.034	-0.0323406	0.527003	0.246689	348
353.024	-0.0339834	0.517076	0.245608	349
354.028	-0.0351538	0.507009	0.245196	350
355.033	-0.0359933	0.496964	0.244451	351
356.022	-0.0364082	0.487087	0.243874	352
357.028	-0.0365497	0.477007	0.242089	353
358.034	-0.0365218	0.466925	0.2424	354
359.026	-0.0363253	0.457029	0.240967	355
360.031	-0.0362862	0.446964	0.240371	356
361.036	-0.0362369	0.436922	0.240586	357
362.026	-0.0362557	0.427019	0.238302	358
363.034	-0.0363249	0.416926	0.238039	359
364.025	-0.0364381	0.407015	0.237887	360
365.033	-0.036697	0.396963	0.236853	361
366.037	-0.0369385	0.386881	0.235985	362
367.026	-0.0372391	0.377019	0.235226	363
368.032	-0.0376253	0.366947	0.234953	364
369.038	-0.0381523	0.356896	0.234519	365
370.029	-0.038612	0.346993	0.233813	366
371.034	-0.0391356	0.336934	0.232643	367
372.025	-0.039722	0.326965	0.232649	368
373.029	-0.0403588	0.316939	0.232168	369
374.035	-0.0411706	0.306883	0.231051	370
375.026	-0.0417273	0.297001	0.229491	371
376.046	-0.0425143	0.286795	0.22981	372
377.037	-0.0432284	0.276889	0.229431	373
378.026	-0.044059	0.267005	0.228972	374
379.033	-0.0447452	0.256935	0.227565	375
380.024	-0.045447	0.246991	0.227169	376
381.036	-0.0463011	0.236904	0.226609	377
382.038	-0.0470386	0.226867	0.226519	378
383.025	-0.0477585	0.217002	0.225861	379
384.048	-0.0486503	0.206758	0.224667	380
385.053	-0.0493691	0.196696	0.224277	381
386.028	-0.0500512	0.18696	0.223217	382
387.033	-0.0507954	0.176921	0.222783	383
388.022	-0.0516317	0.166999	0.222938	384
389.028	-0.0523156	0.156927	0.221314	385
390.035	-0.0530084	0.14686	0.22064	386
391.025	-0.0538658	0.137	0.220061	387
392.048	-0.0545111	0.126746	0.21886	388
393.022	-0.0551609	0.116997	0.21756	389
394.028	-0.0558161	0.106947	0.216897	390
395.033	-0.0566377	0.0968689	0.215024	391
396.025	-0.057239	0.0869642	0.214653	392
397.03	-0.0577911	0.0769031	0.214509	393
398.035	-0.0583069	0.0668723	0.213416	394
399.026	-0.0587886	0.0569674	0.211325	395
400.034	-0.0593199	0.0469241	0.210928	396
401.024	-0.0596681	0.0369982	0.209751	397
402.032	-0.0601108	0.02692	0.207924	398
403.022	-0.0605234	0.0170005	0.20787	399
404.028	-0.0608506	0.0069406	0.206072	400
405.033	-0.0610451	-0.00311788	0.20496	401
406.023	-0.0612966	-0.0130056	0.204634	402
407.03	-0.0616158	-0.0230603	0.202762	403
408.037	-0.0620124	-0.0331535	0.201661	404
409.028	-0.0626081	-0.0430436	0.200494	405
410.035	-0.062971	-0.0531112	0.199809	406
411.026	-0.0629613	-0.0630282	0.197103	407
412.063	-0.0629975	-0.0734217	0.195526	408
413.036	-0.063031	-0.0831351	0.194893	409
414.026	-0.0630465	-0.093031	0.192731	410
415.029	-0.0630268	-0.103071	0.192867	411
416.031	-0.0629895	-0.113091	0.190646	412
417.031	-0.0629549	-0.12311	0.189181	413
418.035	-0.0629254	-0.133133	0.187181	414
419.037	-0.0628988	-0.143148	0.186403	415
420.023	-0.0628827	-0.152997	0.18404	416
421.026	-0.0628867	-0.163045	0.183428	417
422.029	-0.0629076	-0.173078	0.181179	418
423.029	-0.0629462	-0.183054	0.180333	419
424.032	-0.0630181	-0.193093	0.179225	420
425.032	-0.0631318	-0.203126	0.177549	421
426.032	-0.0632151	-0.213141	0.175723	422
427.033	-0.0633411	-0.223143	0.174401	423
428.035	-0.0634522	-0.233179	0.173381	424
429.052	-0.0635795	-0.243343	0.170211	425
430.023	-0.0638073	-0.25304	0.169691	426
431.025	-0.0638815	-0.263048	0.167234	427
432.026	-0.0639529	-0.273054	0.16584	428
433.028	-0.0640182	-0.283062	0.164756	429
434.031	-0.0640842	-0.293076	0.162334	430
435.033	-0.0642033	-0.303127	0.160362	431
436.035	-0.0642214	-0.313138	0.159526	432
437.036	-0.0642723	-0.323125	0.15666	433
438.036	-0.064287	-0.333157	0.155547	434
439.036	-0.0642824	-0.343178	0.153967	435
440.037	-0.0641452	-0.35318	0.15135	436
441.024	-0.0642004	-0.363077	0.149278	437
442.026	-0.0641452	-0.373062	0.147944	438
443.027	-0.0640685	-0.383074	0.145828	439
444.029	-0.063987	-0.393087	0.144282	440
445.031	-0.0639987	-0.403103	0.141904	441
446.032	-0.0639258	-0.413122	0.139608	442
447.034	-0.0638026	-0.423143	0.138671	443
448.034	-0.0641147	-0.433112	0.136653	444
449.034	-0.0638379	-0.443138	0.134276	445
450.035	-0.0637201	-0.453152	0.132645	446
451.052	-0.0636018	-0.463336	0.130721	447
452.037	-0.063487	-0.473162	0.128263	448
453.037	-0.0633722	-0.483175	0.127188	449
454.023	-0.0632421	-0.493037	0.1241	450
455.025	-0.0630891	-0.503061	0.123101	451
456.026	-0.0628989	-0.513069	0.121071	452
457.027	-0.0628235	-0.52309	0.119261	453
458.027	-0.0627147	-0.533061	0.117209	454
459.027	-0.0625566	-0.543106	0.115215	455
460.029	-0.0623874	-0.553129	0.113521	456
461.031	-0.0621969	-0.563114	0.111146	457
462.033	-0.0620043	-0.573178	0.109425	458
463.035	-0.0617994	-0.583196	0.107412	459
464.037	-0.0615648	-0.593214	0.105081	460
465.025	-0.0613309	-0.603064	0.104028	461
466.026	-0.061112	-0.613118	0.10123	462
467.026	-0.0608658	-0.623128	0.100567	463
468.029	-0.0605987	-0.633108	0.0983552	464
469.031	-0.0603495	-0.643127	0.096419	465
470.033	-0.0600818	-0.65318	0.0942112	466
471.034	-0.0598196	-0.663179	0.0919712	467
472.036	-0.059406	-0.673214	0.0905109	468
473.023	-0.0591438	-0.6831	0.0881031	469
474.024	-0.0589128	-0.693092	0.0865811	470
475.025	-0.0585566	-0.703068	0.0844511	471
476.026	-0.0582186	-0.713111	0.082637	472
477.028	-0.0577904	-0.723115	0.0814517	473
478.028	-0.0574759	-0.733098	0.0788571	474
479.029	-0.0572888	-0.743127	0.076693	475
480.029	-0.0569083	-0.753137	0.075534	476
481.03	-0.0565286	-0.763152	0.0739035	477
482.047	-0.0559841	-0.773292	0.071421	478
483.034	-0.05558	-0.78317	0.0696122	479
484.024	-0.0551757	-0.793079	0.0683469	480
485.026	-0.0477151	-0.796208	0.0663334	481
486.027	-0.0380943	-0.786191	0.0641142	482
487.027	-0.0317379	-0.776185	0.0620914	483
488.028	-0.0267946	-0.766163	0.0610483	484
489.028	-0.022815	-0.756175	0.0613278	485
490.029	-0.0194384	-0.746186	0.0596839	486
491.03	-0.0164318	-0.73617	0.0594897	487
492.032	-0.0138317	-0.726159	0.0599862	488
493.033	-0.0115075	-0.716142	0.0603332	489
494.035	-0.00932275	-0.706121	0.060066	490
495.037	-0.00736776	-0.696092	0.0595491	491
496.023	-0.00555708	-0.686242	0.0601189	492
497.025	-0.00379395	-0.67621	0.0603104	493
498.027	-0.00213414	-0.666236	0.0604468	494
499.028	-0.000558825	-0.656225	0.0612782	495
500.03	0.0010104	-0.646213	0.0620373	496
501.032	0.00252116	-0.636184	0.062444	497
502.036	0.00408666	-0.626184	0.0635874	498
503.022	0.00549885	-0.616333	0.0633435	499
504.025	0.00700267	-0.606282	0.064558	500
505.027	0.00841105	-0.596244	0.0655863	501
506.045	0.00988241	-0.58605	0.0666632	502
507.031	0.0113018	-0.576247	0.0672277	503
508.032	0.0126781	-0.566218	0.0686928	504
509.032	0.0140999	-0.55624	0.069992	505
510.034	0.0154749	-0.546214	0.0715363	506
511.035	0.0168503	-0.536207	0.0725932	507
512.036	0.0182659	-0.526195	0.0738682	508
513.052	0.019657	-0.516013	0.0748981	509
514.037	0.021001	-0.506167	0.0768702	510
515.022	0.0223592	-0.496324	0.0782144	511
516.022	0.0236475	-0.486326	0.0796956	512
517.026	0.0250397	-0.476269	0.0816658	513
518.028	0.0263657	-0.466267	0.0835719	514
519.03	0.0276942	-0.456263	0.0847817	515
520.031	0.0290936	-0.446245	0.0861791	516
521.035	0.030424	-0.436183	0.0882948	517
522.036	0.0317963	-0.426175	0.0899146	518
523.036	0.0331684	-0.416178	0.0920013	519
524.036	0.0344327	-0.406197	0.0933927	520
525.036	0.0357962	-0.396222	0.0949635	521
526.037	0.0370538	-0.386209	0.0971586	522
527.022	0.0384846	-0.376357	0.0997256	523
528.023	0.0398054	-0.366345	0.101847	524
529.027	0.0413993	-0.356289	0.103323	525
530.027	0.0426283	-0.346299	0.105455	526
531.027	0.0440955	-0.336242	0.106658	527
532.029	0.0454935	-0.326259	0.109747	528
533.029	0.0469699	-0.316283	0.11176	529
534.048	0.0486594	-0.306088	0.11382	530
535.033	0.04987	-0.296249	0.115777	531
536.034	0.0513021	-0.286235	0.117946	532
537.035	0.052743	-0.276199	0.120394	533
538.036	0.0539863	-0.266188	0.122876	534
539.025	0.0552091	-0.256321	0.12489	535
540.027	0.0563626	-0.246291	0.127485	536
541.028	0.0575034	-0.236261	0.129419	537
542.03	0.0584287	-0.226276	0.132042	538
543.031	0.0594001	-0.216272	0.134577	539
544.033	0.0601791	-0.206281	0.137027	540
545.034	0.0609618	-0.196225	0.138748	541
546.035	0.0616996	-0.186211	0.141148	542
547.035	0.0623838	-0.176201	0.143588	543
548.037	0.0630576	-0.166192	0.145639	544
549.026	0.0637363	-0.156316	0.148356	545
550.027	0.0643695	-0.146273	0.150286	546
551.03	0.0650571	-0.136252	0.152478	547
552.03	0.0656146	-0.126246	0.154458	548
553.032	0.0662229	-0.116236	0.15672	549
554.05	0.0670227	-0.106049	0.158367	550
555.034	0.0675926	-0.0961898	0.16128	551
556.036	0.0682025	-0.0861933	0.162668	552
557.023	0.0688628	-0.0763073	0.165178	553
558.023	0.0694771	-0.0663011	0.166797	554
559.04	0.0700516	-0.0561525	0.16982	555
560.025	0.0705936	-0.046272	0.171498	556
561.025	0.0709787	-0.03628	0.173315	557
562.027	0.0717572	-0.0262831	0.174962	558
563.027	0.0724111	-0.0162803	0.17652	559
564.028	0.0724629	-0.00627422	0.178424	560
565.029	0.0724777	0.00371923	0.180961	561
566.032	0.0725413	0.0137611	0.182496	562
567.032	0.0725984	0.0237709	0.184048	563
568.036	0.0724915	0.0337942	0.186161	564
569.023	0.0728701	0.0436783	0.187876	565
570.023	0.0728153	0.0536969	0.189164	566
571.024	0.0728258	0.0637284	0.191188	567
572.025	0.0728145	0.0737192	0.192643	568
573.025	0.0727715	0.0837204	0.194489	569
574.025	0.0726816	0.0937042	0.195975	570
575.025	0.0725689	0.103721	0.198052	571
576.025	0.0724075	0.113714	0.198638	572
577.025	0.0722248	0.123712	0.200058	573
578.025	0.0720185	0.133713	0.202162	574
579.025	0.0718038	0.143737	0.203509	575
580.025	0.0714989	0.153731	0.203962	576
581.025	0.0710923	0.163727	0.205295	577
582.025	0.07087	0.173723	0.207158	578
583.026	0.0708718	0.18374	0.207904	579
584.026	0.070763	0.193702	0.209127	580
585.026	0.0706683	0.203737	0.20996	581
586.026	0.0705881	0.21378	0.211258	582
587.026	0.0704673	0.223744	0.21276	583
588.026	0.0701464	0.233754	0.212931	584
589.026	0.0701761	0.243774	0.214194	585
590.026	0.069982	0.253758	0.21512	586
591.026	0.0697871	0.263748	0.216119	587
592.027	0.0695649	0.273752	0.216113	588
593.027	0.0693524	0.283762	0.217865	589
594.028	0.0691213	0.293745	0.218476	590
595.028	0.0689113	0.303752	0.219084	591
596.029	0.06853	0.313789	0.220475	592
597.029	0.0682913	0.323784	0.221439	593
598.046	0.0682126	0.333931	0.221817	594
599.031	0.0677487	0.34378	0.222565	595
600.047	0.0672177	0.353942	0.223404	596
601.033	0.0669284	0.363791	0.224294	597
602.035	0.0665998	0.373801	0.224588	598
603.037	0.0662002	0.383818	0.225173	599
604.024	0.0657869	0.39371	0.225737	600
605.024	0.0652567	0.403684	0.227314	601
606.024	0.0649698	0.413708	0.227383	602
607.025	0.0644016	0.423747	0.227461	603
608.025	0.0638701	0.433733	0.228774	604
609.025	0.0632892	0.443754	0.229418	605
610.026	0.062765	0.453712	0.22992	606
611.026	0.0622729	0.463721	0.230383	607
612.027	0.0617637	0.473756	0.231633	608
613.028	0.0611168	0.483775	0.232031	609
614.028	0.0606915	0.493801	0.232331	610
615.028	0.0603592	0.503791	0.23265	611
616.028	0.0595818	0.513799	0.23335	612
617.028	0.0591446	0.523767	0.233993	613
618.028	0.0586379	0.533763	0.23471	614
619.028	0.0580248	0.543792	0.235427	615
620.03	0.0570096	0.55381	0.23602	616
621.03	0.0562223	0.56379	0.236888	617
622.03	0.0552469	0.573806	0.237186	618
623.046	0.0541907	0.583959	0.237852	619
624.03	0.052977	0.593791	0.237588	620
625.032	0.0521191	0.603826	0.238557	621
626.048	0.0511691	0.613968	0.240098	622
627.033	0.050115	0.623802	0.239688	623
628.034	0.0490696	0.633841	0.240173	624
629.035	0.0476941	0.64385	0.24088	625
630.035	0.0464144	0.653864	0.242209	626
631.035	0.0450119	0.663856	0.242347	627
632.036	0.043567	0.673853	0.242681	628
633.024	0.0420683	0.683743	0.242834	629
634.023	0.0406629	0.693733	0.243357	630
635.025	0.0392295	0.703747	0.244452	631
636.027	0.0378104	0.713793	0.24408	632
637.027	0.0365945	0.723799	0.244639	633
638.028	0.035333	0.733846	0.245108	634
639.029	0.0340419	0.743821	0.245355	635
640.045	0.0328316	0.753986	0.245532	636
641.029	0.0316691	0.763839	0.24564	637
642.029	0.0303991	0.773835	0.245903	638
643.03	0.0293505	0.78383	0.247138	639
644.031	0.0282646	0.793829	0.247323	640
645.034	0.0271824	0.803872	0.247269	641
646.035	0.0261853	0.813887	0.246939	642
647.037	0.0251282	0.823915	0.247419	643
648.039	0.0241878	0.833951	0.247739	644
649.039	0.0232486	0.843938	0.247804	645
650.04	0.0223162	0.853968	0.247109	646
651.04	0.0214189	0.863932	0.247462	647
652.04	0.0205208	0.873943	0.24777	648
653.041	0.0197246	0.883965	0.247926	649
654.041	0.018964	0.893951	0.247682	650
655.041	0.0181953	0.903956	0.24733	651
656.041	0.0174905	0.913959	0.247963	652
657.043	0.0168105	0.923994	0.24826	653
658.061	0.0161349	0.934172	0.247874	654
659.047	0.0155287	0.944046	0.248471	655
660.049	0.0149358	0.954038	0.248181	656
661.052	0.0143901	0.964065	0.248097	657
662.053	0.0138587	0.974072	0.24788	658
663.043	0.0133707	0.983969	0.24827	659
664.043	0.0128997	0.993992	0.248053	660
665.044	0.0111579	0.996577	0.248147	661
666.061	0.00931694	0.986405	0.247564	662
667.046	0.00813275	0.97655	0.248511	663
668.046	0.00715526	0.966562	0.247896	664
669.047	0.00635301	0.95657	0.248416	665
670.049	0.00565076	0.946551	0.247752	666
671.051	0.0050143	0.936511	0.248096	667
672.067	0.00436965	0.926306	0.248204	668
673.039	0.00385984	0.916601	0.249114	669
674.04	0.00336044	0.906568	0.247645	670
675.041	0.00288599	0.896626	0.24806	671
676.041	0.00241274	0.886621	0.247879	672
677.042	0.00196299	0.876619	0.247504	673
678.058	0.00150511	0.866523	0.248166	674
679.044	0.00105333	0.856613	0.248356	675
680.062	0.000580948	0.846387	0.247906	676
681.047	0.00011448	0.836536	0.247397	677
682.048	-0.000351632	0.826513	0.247433	678
683.048	-0.000827571	0.816484	0.248216	679
684.049	-0.00132088	0.806513	0.247939	680
685.052	-0.00183453	0.796528	0.248034	681
686.039	-0.00237543	0.786654	0.24813	682
687.043	-0.00292834	0.776617	0.248233	683
688.043	-0.00351708	0.766633	0.248347	684
689.046	-0.0041329	0.756571	0.24795	685
690.047	-0.00479393	0.74655	0.247431	686
691.05	-0.00546379	0.736476	0.247068	687
692.052	-0.00616742	0.726458	0.247356	688
693.038	-0.00695149	0.71662	0.247728	689
694.038	-0.00770331	0.706667	0.246859	690
695.039	-0.00852734	0.696632	0.247328	691
696.041	-0.00939466	0.686627	0.246917	692
697.041	-0.0103076	0.676553	0.246572	693
698.042	-0.0112814	0.666552	0.246489	694
699.061	-0.0124385	0.656363	0.246795	695
700.062	-0.0134991	0.646358	0.246779	696
701.047	-0.0147745	0.636511	0.246463	697
702.051	-0.0160214	0.626434	0.246666	698
703.099	-0.0175295	0.615988	0.245765	699
704.038	-0.0188257	0.606631	0.244993	700
705.039	-0.0203013	0.596611	0.244952	701
706.039	-0.0216901	0.586643	0.244705	702
707.04	-0.0231941	0.576648	0.243961	703
708.04	-0.0245339	0.56661	0.244294	704
709.041	-0.0260463	0.556613	0.243874	705
710.041	-0.0274347	0.546596	0.242296	706
711.041	-0.0290044	0.536596	0.242245	707
712.042	-0.0306811	0.526582	0.241723	708
713.042	-0.0321728	0.516608	0.241185	709
714.042	-0.0337019	0.506603	0.240112	710
715.043	-0.034776	0.496575	0.238958	711
716.043	-0.0355608	0.486627	0.239339	712
717.043	-0.0359393	0.476621	0.238098	713
718.044	-0.036299	0.466577	0.237023	714
719.048	-0.0363519	0.456542	0.236522	715
720.05	-0.0363348	0.446507	0.23535	716
721.052	-0.0365256	0.436456	0.234746	717
722.038	-0.0366054	0.426576	0.233644	718
723.039	-0.0367249	0.4166	0.23304	719
724.041	-0.0368948	0.406593	0.231518	720
725.044	-0.0370809	0.396536	0.231526	721
726.044	-0.037327	0.386568	0.230624	722
727.045	-0.037657	0.376533	0.229963	723
728.049	-0.0381793	0.366469	0.228765	724
729.051	-0.0384801	0.356462	0.229005	725
730.053	-0.0389024	0.346451	0.228176	726
731.04	-0.0393798	0.336556	0.227146	727
732.042	-0.0400979	0.326556	0.226457	728
733.043	-0.0405136	0.316525	0.225632	729
734.044	-0.0410815	0.306517	0.225245	730
735.044	-0.0417505	0.296549	0.22461	731
736.045	-0.0424561	0.286547	0.223366	732
737.046	-0.042961	0.276543	0.224027	733
738.046	-0.0437221	0.266501	0.223184	734
739.056	-0.0444012	0.256404	0.221856	735
740.051	-0.0450993	0.246472	0.221782	736
741.053	-0.0458964	0.236447	0.220033	737
742.051	-0.0465356	0.226473	0.220093	738
743.05	-0.0474208	0.216483	0.219343	739
744.067	-0.0479931	0.206305	0.218347	740
745.051	-0.0486469	0.196497	0.216874	741
746.038	-0.0493362	0.186589	0.216335	742
747.038	-0.050025	0.176635	0.215698	743
748.038	-0.050845	0.166592	0.215466	744
749.053	-0.0515255	0.156454	0.214296	745
750.041	-0.0521951	0.146577	0.214049	746
751.042	-0.0530912	0.136572	0.212529	747
752.042	-0.0536143	0.126552	0.211913	748
753.043	-0.0542706	0.11655	0.210496	749
754.044	-0.0550697	0.106511	0.210393	750
755.044	-0.0556959	0.0965024	0.209575	751
756.06	-0.0563306	0.0863558	0.20729	752
757.045	-0.0569254	0.0765436	0.207559	753
758.045	-0.0575036	0.0665089	0.206758	754
759.045	-0.0580436	0.0565167	0.204561	755
760.047	-0.0586743	0.0464779	0.204174	756
761.049	-0.0589534	0.0364532	0.20338	757
762.05	-0.0593136	0.0264725	0.200955	758
763.051	-0.0598451	0.0164415	0.200953	759
764.052	-0.0600466	0.00644041	0.199705	760
765.038	-0.0603949	-0.00340085	0.198108	761
766.039	-0.0607062	-0.013387	0.197365	762
767.04	-0.0611321	-0.0234424	0.195603	763
768.041	-0.0616625	-0.033446	0.194609	764
769.041	-0.0623211	-0.0434476	0.193479	765
770.041	-0.0629507	-0.0534327	0.190852	766
771.042	-0.0627483	-0.0634783	0.190645	767
772.044	-0.0627436	-0.0734752	0.18876	768
773.044	-0.0626857	-0.0834746	0.187842	769
774.046	-0.0626366	-0.0934953	0.185346	770
775.05	-0.0625556	-0.103557	0.184973	771
776.051	-0.0624813	-0.113502	0.183221	772
777.051	-0.0624105	-0.123561	0.182171	773
778.051	-0.0623023	-0.133553	0.180874	774
779.068	-0.0621456	-0.143706	0.179211	775
780.04	-0.0621765	-0.153458	0.178497	776
781.042	-0.0621064	-0.163453	0.17748	777
782.044	-0.0620868	-0.173453	0.176745	778
783.046	-0.062105	-0.183503	0.173329	779
784.064	-0.0620947	-0.193681	0.173431	780
785.05	-0.0621951	-0.203529	0.170848	781
786.053	-0.0622898	-0.213565	0.168414	782
787.038	-0.0623852	-0.223429	0.169315	783
788.102	-0.0624788	-0.234071	0.168619	784
789.041	-0.0625784	-0.243438	0.1636	785
790.044	-0.0626773	-0.253501	0.163121	786
791.044	-0.0628392	-0.2635	0.161759	787
792.079	-0.0628679	-0.273837	0.159456	788
793.05	-0.0629111	-0.283526	0.157326	789
794.053	-0.0629403	-0.293573	0.15545	790
795.038	-0.0629837	-0.303416	0.154385	791
796.039	-0.0629808	-0.313406	0.151568	792
797.041	-0.0629926	-0.323479	0.150351	793
798.043	-0.0628898	-0.333503	0.146895	794
799.044	-0.0629815	-0.343511	0.146364	795
800.061	-0.0628414	-0.353685	0.144514	796
801.046	-0.0627412	-0.363532	0.141822	797
802.046	-0.0623867	-0.373515	0.140738	798
803.046	-0.0623052	-0.383511	0.13856	799
804.048	-0.0622364	-0.393521	0.137388	800
805.05	-0.0621136	-0.403547	0.134997	801
806.049	-0.0620513	-0.413536	0.134522	802
807.066	-0.06198	-0.423703	0.132609	803
808.038	-0.0618224	-0.433432	0.131301	804
809.042	-0.0617423	-0.443485	0.12785	805
810.044	-0.0617428	-0.453509	0.125993	806
811.045	-0.06165	-0.463529	0.125518	807
812.063	-0.0615243	-0.473659	0.121946	808
813.05	-0.0614264	-0.483531	0.120204	809
814.067	-0.061337	-0.493726	0.119564	810
815.052	-0.0612267	-0.503552	0.11637	811
816.038	-0.0611334	-0.513409	0.114817	812
817.041	-0.0610332	-0.523443	0.115827	813
818.042	-0.0609246	-0.533479	0.112818	814
819.043	-0.060734	-0.543481	0.110176	815
820.044	-0.0606781	-0.553504	0.10869	816
821.046	-0.0604933	-0.563521	0.10666	817
822.046	-0.0603218	-0.573526	0.103604	818
823.046	-0.0601355	-0.583503	0.103549	819
824.047	-0.0599209	-0.593512	0.101696	820
825.047	-0.059719	-0.603507	0.0994045	821
826.063	-0.0595085	-0.61368	0.0956328	822
827.048	-0.0592841	-0.623554	0.0942104	823
828.051	-0.0589822	-0.633573	0.0924114	824
829.038	-0.058743	-0.643418	0.0902769	825
830.04	-0.0585002	-0.653447	0.0888381	826
831.043	-0.0582429	-0.663488	0.0881438	827
832.06	-0.0580485	-0.673644	0.0852926	828
833.045	-0.0577081	-0.683488	0.0834689	829
834.062	-0.0573592	-0.693678	0.0815858	830
835.048	-0.0570716	-0.703532	0.0811971	831
836.05	-0.0568317	-0.713573	0.0775889	832
837.052	-0.0564798	-0.723553	0.0755585	833
838.039	-0.0561681	-0.733446	0.0741387	834
839.042	-0.0558316	-0.743464	0.072783	835
840.044	-0.0555051	-0.75352	0.0706695	836
841.045	-0.0551661	-0.763474	0.0708516	837
842.047	-0.0550236	-0.773518	0.0667168	838
843.048	-0.0546551	-0.783547	0.066877	839
844.05	-0.0542199	-0.793563	0.0643997	840
845.05	-0.0465697	-0.795851	0.0626836	841
846.053	-0.0376816	-0.785801	0.0619719	842
847.054	-0.0316649	-0.775798	0.0575461	843
848.056	-0.0269505	-0.765772	0.0563049	844
849.057	-0.023096	-0.755732	0.0580303	845
850.057	-0.0198167	-0.745771	0.0565962	846
851.059	-0.0170302	-0.73573	0.0550293	847
852.076	-0.0144873	-0.725571	0.0575685	848
853.06	-0.0122413	-0.71575	0.0576353	849
854.06	-0.0102842	-0.705728	0.0550941	850
855.06	-0.00837526	-0.695729	0.0545143	851
856.061	-0.00658081	-0.685746	0.0567845	852
857.062	-0.00493569	-0.675761	0.0586066	853
858.062	-0.00329297	-0.665744	0.0591233	854
859.065	-0.0017807	-0.655722	0.0563604	855
860.065	-0.000217105	-0.645704	0.057493	856
861.066	0.00118903	-0.635688	0.0577844	857
862.066	0.0026582	-0.62571	0.0583202	858
863.053	0.00400881	-0.615849	0.0587115	859
864.054	0.00543927	-0.605823	0.0596454	860
865.056	0.00677029	-0.595822	0.0625634	861
866.058	0.00818667	-0.585788	0.0623535	862
867.059	0.00949406	-0.575758	0.0630658	863
868.059	0.010839	-0.565801	0.0648823	864
869.06	0.012244	-0.555799	0.0673613	865
870.062	0.0134673	-0.545771	0.0687131	866
871.063	0.0148447	-0.535774	0.0663999	867
872.065	0.0160955	-0.52577	0.070386	868
873.066	0.0174854	-0.515765	0.0691113	869
874.053	0.0186988	-0.505897	0.0739201	870
875.054	0.0199851	-0.495872	0.0741971	871
876.056	0.0213303	-0.485829	0.075515	872
877.058	0.0225843	-0.475818	0.0758351	873
878.059	0.0238747	-0.465806	0.0784208	874
879.059	0.0251469	-0.455811	0.0808896	875
880.076	0.0264727	-0.445631	0.0827399	876
881.061	0.0277083	-0.435778	0.0808475	877
882.063	0.0290494	-0.425792	0.083144	878
883.065	0.0302725	-0.415755	0.0874901	879
884.067	0.0316025	-0.405736	0.0881263	880
885.068	0.0328377	-0.395728	0.089935	881
886.055	0.0341752	-0.385872	0.09062	882
887.058	0.0354451	-0.375845	0.0932742	883
888.076	0.0367391	-0.365632	0.0951973	884
889.062	0.0381332	-0.355778	0.0963315	885
890.064	0.0395005	-0.34577	0.0976985	886
891.064	0.0409174	-0.335768	0.10014	887
892.064	0.0423918	-0.325777	0.104541	888
893.066	0.0437127	-0.315776	0.106012	889
894.067	0.0451959	-0.305772	0.108363	890
895.068	0.0465047	-0.295762	0.109939	891
896.069	0.0478502	-0.28575	0.109657	892
897.072	0.0492061	-0.275748	0.112532	893
898.074	0.0505936	-0.265719	0.114153	894
899.079	0.0517705	-0.25567	0.116319	895
900.071	0.0529805	-0.245744	0.120157	896
901.072	0.0540126	-0.235731	0.123674	897
902.073	0.0550088	-0.225703	0.125871	898
903.073	0.0559669	-0.215713	0.126664	899
904.074	0.0568324	-0.20571	0.129187	900
905.075	0.0577656	-0.195691	0.132571	901
906.076	0.0584711	-0.18567	0.135461	902
907.076	0.059166	-0.17565	0.136922	903
908.077	0.059861	-0.16566	0.139324	904
909.079	0.0604774	-0.155657	0.141848	905
910.08	0.0612992	-0.145608	0.143347	906
911.081	0.0619166	-0.135587	0.145753	907
912.083	0.0625712	-0.125576	0.145328	908
913.085	0.0632921	-0.115549	0.148779	909
914.07	0.0639034	-0.105693	0.152623	910
915.074	0.0647349	-0.0956207	0.152522	911
916.076	0.0656364	-0.0856261	0.156979	912
917.077	0.0662638	-0.075627	0.156213	913
918.079	0.066987	-0.0656129	0.160242	914
919.08	0.0678059	-0.0556048	0.160004	915
920.083	0.0682377	-0.0455755	0.16214	916
921.083	0.0687762	-0.0356039	0.165269	917
922.083	0.0696445	-0.0256009	0.166498	918
923.083	0.070579	-0.0155859	0.169648	919
924.069	0.0705629	-0.00575886	0.16941	920
925.086	0.070542	0.00444018	0.172334	921
926.072	0.0706554	0.0143119	0.174042	922
927.074	0.0707139	0.0243339	0.175428	923
928.075	0.0707678	0.0343298	0.179756	924
929.077	0.0708412	0.0443455	0.178962	925
930.079	0.070917	0.0543664	0.183592	926
931.083	0.0709547	0.0644004	0.183615	927
932.069	0.0709617	0.0742608	0.185392	928
933.071	0.070949	0.0842872	0.185446	929
934.071	0.0708394	0.0943048	0.187614	930
935.073	0.0707618	0.104321	0.189148	931
936.073	0.0705943	0.114317	0.190793	932
937.076	0.0704227	0.124342	0.192884	933
938.079	0.070235	0.134407	0.195954	934
939.081	0.0700029	0.144411	0.196647	935
940.083	0.0698029	0.154397	0.197948	936
941.085	0.0695819	0.164444	0.198509	937
942.071	0.0694029	0.174278	0.201651	938
943.073	0.0692428	0.18431	0.199715	939
944.073	0.0690848	0.194292	0.202233	940
945.075	0.0689649	0.204323	0.205163	941
946.093	0.0688239	0.214516	0.205331	942
947.079	0.068714	0.224415	0.204987	943
948.082	0.0685995	0.234445	0.208112	944
949.083	0.0684689	0.244447	0.209186	945
950.069	0.0683457	0.254308	0.210209	946
951.073	0.0682641	0.264367	0.210808	947
952.075	0.0680474	0.27439	0.211508	948
953.075	0.0678448	0.284381	0.212628	949
954.076	0.0676665	0.294387	0.21376	950
955.077	0.0674651	0.3044	0.215209	951
956.079	0.0672863	0.314418	0.215045	952
957.081	0.0668259	0.324437	0.21704	953
958.084	0.0667528	0.334473	0.215977	954
959.069	0.066564	0.344323	0.215308	955
960.071	0.0663498	0.35436	0.219705	956
961.073	0.0659224	0.364361	0.220228	957
962.073	0.065693	0.374364	0.220721	958
963.074	0.0653864	0.384356	0.221296	959
964.076	0.0651205	0.394387	0.222257	960
965.077	0.0648361	0.404412	0.220584	961
966.077	0.0645373	0.414406	0.222065	962
967.092	0.0640406	0.42455	0.223619	963
968.079	0.0638348	0.434463	0.222728	964
969.08	0.0634502	0.444455	0.224471	965
970.083	0.0630591	0.454464	0.223676	966
971.069	0.0626481	0.464327	0.225608	967
972.071	0.0622545	0.474364	0.225631	968
973.073	0.0617254	0.484349	0.225792	969
974.074	0.0614034	0.494366	0.226323	970
975.075	0.0610352	0.504413	0.226995	971
976.076	0.0606555	0.514428	0.226504	972
977.079	0.0602138	0.524457	0.228341	973
978.081	0.0596416	0.534495	0.228692	974
979.083	0.0590667	0.544509	0.228702	975
980.084	0.0582296	0.554522	0.229445	976
981.084	0.0572056	0.564505	0.230717	977
982.069	0.0562472	0.574357	0.23117	978
983.085	0.0551916	0.584507	0.232278	979
984.072	0.0540956	0.594398	0.233147	980
985.074	0.0530906	0.604423	0.233026	981
986.075	0.051952	0.61441	0.233724	982
987.076	0.0509334	0.624436	0.233827	983
988.078	0.0496471	0.634475	0.234417	984
989.078	0.0484518	0.644475	0.234653	985
990.079	0.0470171	0.654467	0.23564	986
991.08	0.045591	0.664462	0.236434	987
992.082	0.0441281	0.674461	0.236794	988
993.069	0.0427613	0.684337	0.237197	989
994.084	0.0413125	0.694511	0.238747	990
995.102	0.0399902	0.704692	0.238133	991
996.088	0.0386534	0.714554	0.239115	992
997.09	0.0374032	0.724596	0.239852	993
998.091	0.0361132	0.734586	0.239638	994
999.094	0.0349177	0.744635	0.241768	995
1000.11	0.0337067	0.754779	0.241256	996
1001.1	0.0325748	0.764647	0.240908	997
1002.1	0.0314409	0.774661	0.241417	998
1003.1	0.0303586	0.784664	0.241896	999
1004.09	0.0292972	0.794531	0.241837	1000
1005.09	0.0282919	0.804541	0.242637	1001
1006.09	0.0272983	0.814558	0.242525	1002
1007.11	0.0262837	0.82479	0.24379	1003
1008.09	0.0253598	0.834622	0.243401	1004
1009.1	0.0244299	0.844694	0.243066	1005
1010.1	0.0235349	0.854651	0.245277	1006
1011.1	0.022666	0.864647	0.244049	1007
1012.1	0.0218081	0.874684	0.2441	1008
1013.09	0.021018	0.884571	0.244382	1009
1014.09	0.020247	0.894578	0.244169	1010
1015.09	0.0195003	0.904598	0.244737	1011
1016.09	0.0187648	0.914562	0.24468	1012
1017.11	0.0180797	0.924774	0.245253	1013
1018.09	0.0174482	0.934582	0.245113	1014
1019.09	0.0168406	0.944632	0.24493	1015
1020.1	0.0162488	0.954665	0.244971	1016
1021.1	0.0156745	0.964674	0.244846	1017
1022.09	0.0151414	0.974565	0.245468	1018
1023.09	0.0146225	0.984594	0.244883	1019
1024.09	0.0141246	0.994574	0.245711	1020
1025.09	0.0122843	0.995921	0.245464	1021
1026.09	0.010479	0.985967	0.246414	1022
1027.09	0.00918822	0.975952	0.245627	1023
1028.09	0.00817498	0.965923	0.245607	1024
1029.09	0.00730867	0.955945	0.245569	1025
1030.11	0.00651047	0.945753	0.24491	1026
1031.1	0.00584177	0.935893	0.244864	1027
1032.1	0.00521899	0.925878	0.244814	1028
1033.1	0.00461386	0.915871	0.245741	1029
1034.1	0.00407812	0.905848	0.245373	1030
1035.12	0.00355565	0.895705	0.24633	1031
1036.09	0.00307456	0.88601	0.245389	1032
1037.1	0.002582	0.875882	0.245385	1033
1038.09	0.00211712	0.866005	0.246563	1034
1039.09	0.0016334	0.85595	0.245277	1035
1040.09	0.00116562	0.845943	0.246486	1036
1041.09	0.000698735	0.8359	0.245512	1037
1042.09	0.000224112	0.825881	0.244686	1038
1043.09	-0.00027729	0.815855	0.244739	1039
1044.1	-0.000762472	0.805842	0.245157	1040
1045.1	-0.00127002	0.795856	0.245554	1041
1046.09	-0.00178544	0.78601	0.244761	1042
1047.09	-0.00233283	0.775991	0.245501	1043
1048.14	-0.00294726	0.76549	0.24511	1044
1049.09	-0.00351599	0.755964	0.244808	1045
1050.09	-0.00413243	0.745936	0.245623	1046
1051.09	-0.00477921	0.735924	0.244868	1047
1052.11	-0.00549236	0.725748	0.245023	1048
1053.09	-0.00619301	0.715878	0.244771	1049
1054.09	-0.00694103	0.705842	0.244794	1050
1055.09	-0.00777209	0.695868	0.24496	1051
1056.1	-0.00858752	0.685835	0.244704	1052
1057.1	-0.00945351	0.675829	0.244087	1053
1058.1	-0.0104083	0.665818	0.244791	1054
1059.1	-0.0114106	0.655789	0.244566	1055
1060.08	-0.0124618	0.645945	0.244105	1056
1061.09	-0.0136531	0.635953	0.243484	1057
1062.09	-0.0148912	0.625918	0.243079	1058
1063.09	-0.0162833	0.615896	0.242948	1059
1064.09	-0.0176378	0.605881	0.242315	1060
1065.09	-0.0190817	0.595923	0.242541	1061
1066.11	-0.0205432	0.585717	0.24178	1062
1067.1	-0.0218464	0.575886	0.241721	1063
1068.1	-0.023296	0.565802	0.240316	1064
1069.09	-0.0246468	0.555952	0.239901	1065
1070.09	-0.0261724	0.545975	0.239075	1066
1071.09	-0.0276602	0.535949	0.239049	1067
1072.09	-0.0293616	0.525918	0.23901	1068
1073.09	-0.0309493	0.515876	0.23776	1069
1074.1	-0.0325209	0.505845	0.237291	1070
1075.1	-0.03372	0.495855	0.23613	1071
1076.1	-0.0346663	0.485844	0.23677	1072
1077.1	-0.0352447	0.47584	0.235389	1073
1078.1	-0.0355825	0.46583	0.234348	1074
1079.1	-0.0358385	0.455767	0.233786	1075
1080.09	-0.0360391	0.445921	0.233384	1076
1081.09	-0.0362465	0.435885	0.231833	1077
1082.09	-0.0364379	0.425886	0.230957	1078
1083.09	-0.0366923	0.415892	0.231182	1079
1084.09	-0.0369349	0.405874	0.229695	1080
1085.09	-0.0371769	0.395879	0.228576	1081
1086.1	-0.0374439	0.385826	0.228159	1082
1087.1	-0.0377536	0.375823	0.226771	1083
1088.1	-0.0381282	0.365816	0.22611	1084
1089.1	-0.0385522	0.355791	0.225001	1085
1090.1	-0.038959	0.345803	0.224542	1086
1091.09	-0.039404	0.33592	0.224021	1087
1092.09	-0.039907	0.325878	0.223097	1088
1093.09	-0.0403994	0.315879	0.22239	1089
1094.09	-0.04103	0.305879	0.222066	1090
1095.09	-0.0415856	0.295866	0.221695	1091
1096.09	-0.0421503	0.285861	0.220901	1092
1097.09	-0.0427417	0.275818	0.220551	1093
1098.1	-0.0433387	0.265844	0.219494	1094
1099.1	-0.0440358	0.255824	0.21884	1095
1100.1	-0.0446548	0.245807	0.218854	1096
1101.1	-0.0452651	0.235798	0.216537	1097
1102.09	-0.0459991	0.225932	0.216669	1098
1103.09	-0.0466246	0.215942	0.216173	1099
1104.09	-0.0472661	0.205934	0.21506	1100
1105.09	-0.0480571	0.195933	0.213554	1101
1106.09	-0.0487001	0.185914	0.213834	1102
1107.09	-0.0493709	0.175865	0.212932	1103
1108.09	-0.0500426	0.16587	0.212363	1104
1109.09	-0.0507656	0.155787	0.2105	1105
1110.1	-0.0513817	0.145825	0.209891	1106
1111.1	-0.0522156	0.13581	0.209183	1107
1112.1	-0.0528049	0.125794	0.20803	1108
1113.1	-0.0534495	0.115791	0.20691	1109
1114.08	-0.0541934	0.105949	0.207211	1110
1115.13	-0.054807	0.0954581	0.205535	1111
1116.09	-0.0555017	0.0859153	0.203648	1112
1117.09	-0.0560964	0.0758765	0.203771	1113
1118.09	-0.0566154	0.0658998	0.202413	1114
1119.09	-0.0571214	0.0558605	0.202058	1115
1120.09	-0.0576035	0.0458535	0.199808	1116
1121.09	-0.057951	0.0358912	0.199035	1117
1122.11	-0.0584002	0.0256936	0.197648	1118
1123.09	-0.0587561	0.0158519	0.196903	1119
1124.12	-0.0591894	0.00554741	0.195311	1120
1125.1	-0.0595704	-0.0041976	0.194252	1121
1126.1	-0.0598939	-0.0141697	0.193928	1122
1127.1	-0.0603372	-0.0241856	0.192019	1123
1128.1	-0.0612971	-0.0341791	0.190619	1124
1129.11	-0.0617712	-0.0443313	0.189311	1125
1130.1	-0.0620367	-0.054186	0.187887	1126
1131.09	-0.0619287	-0.0640383	0.18664	1127
1132.09	-0.0619029	-0.0740704	0.184951	1128
1133.09	-0.0618277	-0.0841029	0.184452	1129
1134.09	-0.06174	-0.0941366	0.182362	1130
1135.09	-0.0616418	-0.104147	0.181783	1131
1136.1	-0.0614896	-0.114177	0.179451	1132
1137.11	-0.0613811	-0.124337	0.178339	1133
1138.12	-0.0612683	-0.134371	0.176997	1134
1139.09	-0.0611299	-0.144071	0.175287	1135
1140.09	-0.0610322	-0.154111	0.173714	1136
1141.1	-0.0610083	-0.164261	0.172117	1137
1142.09	-0.0609996	-0.174121	0.171267	1138
1143.1	-0.060994	-0.184251	0.16898	1139
1144.09	-0.0610209	-0.194129	0.167804	1140
1145.09	-0.0610404	-0.204111	0.165867	1141
1146.09	-0.061102	-0.214127	0.165026	1142
1147.09	-0.0613627	-0.224144	0.162882	1143
1148.09	-0.0613048	-0.234102	0.162016	1144
1149.1	-0.0613438	-0.244186	0.160324	1145
1150.09	-0.0614251	-0.254081	0.158736	1146
1151.1	-0.0615086	-0.26421	0.157083	1147
1152.09	-0.0615773	-0.274127	0.154771	1148
1153.09	-0.0616359	-0.284147	0.153666	1149
1154.09	-0.0615041	-0.294121	0.150812	1150
1155.09	-0.0617155	-0.304169	0.150314	1151
1156.1	-0.0616651	-0.314191	0.14819	1152
1157.1	-0.0616012	-0.324229	0.146932	1153
1158.1	-0.0615243	-0.334187	0.144342	1154
1159.09	-0.0614323	-0.344047	0.142663	1155
1160.09	-0.0613404	-0.354054	0.139956	1156
1161.09	-0.0611851	-0.364083	0.138822	1157
1162.09	-0.0611432	-0.374097	0.13779	1158
1163.09	-0.0610093	-0.384111	0.135227	1159
1164.09	-0.0609283	-0.39413	0.133772	1160
1165.1	-0.0608262	-0.40413	0.132345	1161
1166.11	-0.060734	-0.414338	0.130094	1162
1167.1	-0.0606363	-0.424207	0.127796	1163
1168.1	-0.0605612	-0.434229	0.126915	1164
1169.09	-0.0604753	-0.444098	0.124315	1165
1170.09	-0.0604049	-0.454043	0.122234	1166
1171.1	-0.0603237	-0.464231	0.120595	1167
1172.09	-0.0602288	-0.474054	0.119383	1168
1173.09	-0.0601385	-0.484066	0.116976	1169
1174.09	-0.0600471	-0.494077	0.114835	1170
1175.09	-0.059952	-0.504074	0.113169	1171
1176.09	-0.0598206	-0.514147	0.111522	1172
1177.09	-0.0597136	-0.524121	0.109776	1173
1178.09	-0.0596237	-0.534153	0.107878	1174
1179.09	-0.0595186	-0.544172	0.106133	1175
1180.11	-0.0593965	-0.554311	0.103861	1176
1181.1	-0.0592609	-0.564184	0.101828	1177
1182.1	-0.0590896	-0.574151	0.0998326	1178
1183.1	-0.0589197	-0.584182	0.098106	1179
1184.1	-0.0587329	-0.594223	0.0965415	1180
1185.1	-0.0585233	-0.604234	0.0949439	1181
1186.09	-0.0583037	-0.614062	0.0932539	1182
1187.09	-0.0580616	-0.624137	0.0909838	1183
1188.09	-0.0578232	-0.634097	0.0894877	1184
1189.09	-0.0575833	-0.644141	0.0876461	1185
1190.09	-0.0573296	-0.654126	0.0857734	1186
1191.09	-0.0570734	-0.664136	0.0842668	1187
1192.1	-0.0568407	-0.67417	0.0825477	1188
1193.1	-0.0565843	-0.684187	0.0808708	1189
1194.09	-0.0562634	-0.694088	0.0787034	1190
1195.09	-0.0560328	-0.704058	0.0771738	1191
1196.09	-0.0557531	-0.714102	0.0754394	1192
1197.09	-0.0554566	-0.724119	0.0741473	1193
1198.09	-0.0551539	-0.734102	0.0722909	1194
1199.11	-0.0548376	-0.744272	0.0692687	1195
1200.11	-0.0547945	-0.754286	0.0681162	1196
1201.1	-0.0544624	-0.764176	0.0655696	1197
1202.1	-0.0540214	-0.774166	0.0644277	1198
1203.1	-0.0536981	-0.784163	0.0626703	1199
1204.1	-0.053353	-0.794212	0.0611628	1200
1205.08	-0.0454197	-0.795343	0.0597365	1201
1206.09	-0.0371447	-0.785303	0.0578676	1202
1207.1	-0.031372	-0.775154	0.0557613	1203
1208.09	-0.0269297	-0.765296	0.0556596	1204
1209.09	-0.0232625	-0.755239	0.0538911	1205
1210.09	-0.0201417	-0.745229	0.0534969	1206
1211.09	-0.0174209	-0.735233	0.0528277	1207
1212.09	-0.014995	-0.72523	0.0529148	1208
1213.09	-0.0127858	-0.715237	0.0525721	1209
1214.09	-0.0108499	-0.70521	0.0530483	1210
1215.09	-0.00899861	-0.695212	0.0537236	1211
1216.09	-0.00720891	-0.685202	0.0537454	1212
1217.1	-0.00568813	-0.675194	0.0536482	1213
1218.1	-0.00412609	-0.665177	0.054913	1214
1219.1	-0.00259433	-0.655168	0.0549996	1215
1220.09	-0.00122169	-0.645311	0.0555328	1216
1221.1	0.000270229	-0.635153	0.0547868	1217
1222.09	0.00160284	-0.62528	0.0551699	1218
1223.09	0.00293453	-0.615283	0.0561309	1219
1224.09	0.00433176	-0.605253	0.057787	1220
1225.09	0.0056406	-0.595266	0.0585334	1221
1226.1	0.00699667	-0.585248	0.0591011	1222
1227.1	0.00824656	-0.575269	0.0601945	1223
1228.11	0.00957658	-0.565082	0.0613734	1224
1229.1	0.0108983	-0.555195	0.0620494	1225
1230.09	0.012074	-0.545367	0.0633759	1226
1231.09	0.0134697	-0.535364	0.0646742	1227
1232.09	0.0145947	-0.525337	0.0657201	1228
1233.09	0.0158337	-0.51534	0.0665867	1229
1234.09	0.0171288	-0.505319	0.0681658	1230
1235.09	0.0183197	-0.495299	0.0687503	1231
1236.11	0.0196231	-0.485142	0.0709997	1232
1237.09	0.0207763	-0.475307	0.0723352	1233
1238.11	0.0219917	-0.465118	0.0740208	1234
1239.1	0.0232228	-0.455281	0.0749365	1235
1240.1	0.0245047	-0.445275	0.0768239	1236
1241.1	0.0256969	-0.435249	0.0781996	1237
1242.09	0.0270509	-0.425391	0.0798138	1238
1243.1	0.028213	-0.415172	0.0815784	1239
1244.09	0.0294194	-0.405321	0.0830418	1240
1245.09	0.0306093	-0.395336	0.084361	1241
1246.09	0.0319297	-0.385317	0.0866616	1242
1247.09	0.0332613	-0.375312	0.0879907	1243
1248.1	0.0344856	-0.365314	0.089378	1244
1249.1	0.0359131	-0.355338	0.0913424	1245
1250.1	0.0371226	-0.345303	0.0935779	1246
1251.1	0.038502	-0.335257	0.0950345	1247
1252.09	0.0399842	-0.325407	0.0964725	1248
1253.09	0.0412212	-0.315404	0.0986676	1249
1254.09	0.0425733	-0.305403	0.100508	1250
1255.09	0.0440213	-0.295384	0.10244	1251
1256.09	0.0453524	-0.285393	0.104688	1252
1257.09	0.0467841	-0.27535	0.106677	1253
1258.11	0.0480134	-0.26517	0.109733	1254
1259.1	0.0492833	-0.255323	0.11159	1255
1260.1	0.0503964	-0.245322	0.113712	1256
1261.1	0.0517329	-0.235304	0.115542	1257
1262.1	0.0524761	-0.22532	0.118086	1258
1263.1	0.0533473	-0.215306	0.120213	1259
1264.09	0.0543533	-0.205413	0.122266	1260
1265.09	0.0551577	-0.19539	0.124684	1261
1266.09	0.0561791	-0.185338	0.126967	1262
1267.09	0.0567686	-0.175312	0.128956	1263
1268.1	0.0574925	-0.16531	0.131116	1264
1269.1	0.0581845	-0.155259	0.135007	1265
1270.1	0.0588789	-0.145276	0.135935	1266
1271.1	0.0595006	-0.135243	0.137606	1267
1272.09	0.0603685	-0.125387	0.140767	1268
1273.09	0.0610899	-0.115378	0.141812	1269
1274.09	0.0617928	-0.105357	0.144039	1270
1275.09	0.0626613	-0.0953467	0.147009	1271
1276.09	0.0637458	-0.085355	0.14897	1272
1277.11	0.0643689	-0.0751803	0.151267	1273
1278.09	0.0652069	-0.065323	0.153621	1274
1279.09	0.0659008	-0.0552724	0.154695	1275
1280.09	0.0665403	-0.045291	0.157407	1276
1281.1	0.0671152	-0.0352469	0.158768	1277
1282.1	0.0683879	-0.0252531	0.160189	1278
1283.1	0.0695341	-0.0152166	0.16283	1279
1284.1	0.0692346	-0.00522815	0.164761	1280
1285.1	0.0691117	0.00476134	0.165975	1281
1286.1	0.0692479	0.0147891	0.168433	1282
1287.11	0.0691754	0.0248255	0.170546	1283
1288.11	0.0692194	0.0348194	0.171625	1284
1289.11	0.0692788	0.0448541	0.173977	1285
1290.13	0.0693445	0.0550501	0.175458	1286
1291.11	0.0694184	0.0649089	0.177549	1287
1292.1	0.0694461	0.0747895	0.178745	1288
1293.1	0.0694682	0.0848011	0.179966	1289
1294.1	0.069408	0.0947793	0.18186	1290
1295.1	0.0693755	0.104822	0.183599	1291
1296.11	0.0691896	0.114824	0.184457	1292
1297.11	0.0690336	0.124818	0.187067	1293
1298.11	0.068839	0.134878	0.188159	1294
1299.11	0.0686266	0.144847	0.18882	1295
1300.12	0.0684604	0.154902	0.190651	1296
1301.12	0.0682613	0.164912	0.192559	1297
1302.1	0.0681133	0.174755	0.19376	1298
1303.12	0.0679518	0.184918	0.194341	1299
1304.1	0.0678104	0.194795	0.195866	1300
1305.11	0.0676943	0.204791	0.196993	1301
1306.11	0.0675689	0.214841	0.197941	1302
1307.11	0.067445	0.224852	0.198767	1303
1308.11	0.0673448	0.234881	0.20058	1304
1309.11	0.0672038	0.24493	0.201705	1305
1310.11	0.0670943	0.254927	0.201834	1306
1311.11	0.0669815	0.264989	0.202606	1307
1312.1	0.0668775	0.274806	0.204512	1308
1313.13	0.0667074	0.285121	0.205797	1309
1314.1	0.0664438	0.2948	0.205798	1310
1315.11	0.0664354	0.304834	0.207405	1311
1316.11	0.0662652	0.314841	0.208347	1312
1317.11	0.0660589	0.32488	0.20912	1313
1318.13	0.0658431	0.335041	0.209455	1314
1319.11	0.0656337	0.3449	0.210273	1315
1320.11	0.065421	0.354931	0.211242	1316
1321.1	0.0652102	0.364772	0.212117	1317
1322.1	0.0650051	0.374852	0.21344	1318
1323.1	0.0648051	0.384828	0.213755	1319
1324.11	0.0645566	0.394882	0.214381	1320
1325.11	0.0644012	0.404897	0.214979	1321
1326.13	0.0640325	0.415029	0.217113	1322
1327.11	0.0637887	0.424881	0.216764	1323
1328.11	0.0635523	0.434925	0.217152	1324
1329.12	0.0632699	0.444975	0.218172	1325
1330.12	0.0629942	0.454913	0.219341	1326
1331.1	0.0626822	0.464776	0.219965	1327
1332.1	0.0623957	0.474829	0.220199	1328
1333.1	0.0621036	0.48483	0.220923	1329
1334.1	0.0618204	0.494842	0.223143	1330
1335.11	0.0615219	0.504862	0.222806	1331
1336.11	0.0611983	0.51492	0.223081	1332
1337.11	0.0605655	0.524945	0.224277	1333
1338.11	0.0602064	0.534919	0.224815	1334
1339.11	0.0596668	0.544975	0.225046	1335
1340.11	0.0588951	0.554975	0.226105	1336
1341.12	0.0579765	0.564963	0.226289	1337
1342.12	0.0569673	0.575009	0.226389	1338
1343.11	0.0558785	0.584873	0.228079	1339
1344.11	0.0548253	0.594867	0.228076	1340
1345.11	0.0537457	0.604909	0.229193	1341
1346.12	0.0526678	0.614978	0.230942	1342
1347.1	0.0515024	0.624827	0.231033	1343
1348.1	0.0503088	0.634848	0.231665	1344
1349.11	0.0489245	0.644895	0.232619	1345
1350.11	0.0475922	0.654918	0.23247	1346
1351.11	0.0461228	0.664938	0.234017	1347
1352.11	0.0447623	0.674985	0.233554	1348
1353.11	0.0433543	0.684966	0.23398	1349
1354.11	0.0419938	0.694955	0.234722	1350
1355.1	0.0405816	0.704863	0.235603	1351
1356.1	0.0393658	0.714854	0.2363	1352
1357.1	0.0381146	0.724901	0.23615	1353
1358.11	0.0368485	0.734906	0.236126	1354
1359.11	0.0356515	0.744868	0.236955	1355
1360.11	0.0344881	0.754897	0.237101	1356
1361.11	0.0333247	0.764924	0.23749	1357
1362.11	0.0322395	0.774945	0.237941	1358
1363.11	0.0311714	0.784938	0.238912	1359
1364.11	0.0300856	0.794936	0.239391	1360
1365.11	0.029104	0.804964	0.239106	1361
1366.11	0.0281397	0.814964	0.240548	1362
1367.11	0.0271859	0.824969	0.240584	1363
1368.11	0.0262324	0.835037	0.240412	1364
1369.1	0.0253625	0.844889	0.24072	1365
1370.1	0.0244658	0.854871	0.240456	1366
1371.1	0.0236293	0.864907	0.241496	1367
1372.1	0.0228121	0.874871	0.241149	1368
1373.1	0.0220227	0.884873	0.241742	1369
1374.1	0.0212449	0.894907	0.24204	1370
1375.11	0.0205111	0.904896	0.241416	1371
1376.11	0.0198043	0.914929	0.242289	1372
1377.11	0.0191179	0.924947	0.242209	1373
1378.11	0.0184686	0.934988	0.24274	1374
1379.11	0.0178463	0.944968	0.242712	1375
1380.11	0.0172338	0.95499	0.242891	1376
1381.11	0.0166641	0.964991	0.241907	1377
1382.12	0.0161124	0.975002	0.242363	1378
1383.12	0.015592	0.985022	0.242597	1379
1384.1	0.0151006	0.994862	0.242973	1380
1385.1	0.013197	0.995639	0.243216	1381
1386.1	0.0113919	0.985648	0.243401	1382
1387.11	0.0100856	0.975584	0.244427	1383
1388.11	0.00900899	0.965629	0.243662	1384
1389.11	0.0080997	0.955572	0.243642	1385
1390.11	0.00729894	0.945578	0.242674	1386
1391.11	0.00656131	0.935561	0.243404	1387
1392.11	0.00590224	0.925567	0.243491	1388
1393.11	0.00529287	0.915534	0.243527	1389
1394.11	0.00472284	0.905549	0.242516	1390
1395.11	0.00414303	0.895502	0.243789	1391
1396.12	0.00362954	0.885517	0.244495	1392
1397.1	0.0031386	0.875682	0.243803	1393
1398.1	0.00264734	0.865658	0.243449	1394
1399.1	0.00215654	0.855669	0.243547	1395
1400.1	0.00168565	0.845652	0.243563	1396
1401.11	0.0012128	0.835662	0.24326	1397
1402.11	0.000724999	0.82557	0.24282	1398
1403.11	0.000237692	0.815554	0.243335	1399
1404.13	-0.000285535	0.805351	0.243221	1400
1405.11	-0.000781479	0.795496	0.243295	1401
1406.11	-0.00130569	0.785505	0.243147	1402
1407.11	-0.0018472	0.775525	0.243342	1403
1408.11	-0.00242674	0.765512	0.242981	1404
1409.12	-0.00300381	0.755484	0.243275	1405
1410.1	-0.00360147	0.745672	0.24301	1406
1411.11	-0.00423235	0.735621	0.242868	1407
1412.11	-0.0049362	0.725584	0.243076	1408
1413.11	-0.00562018	0.715586	0.242391	1409
1414.11	-0.00634632	0.705585	0.243122	1410
1415.11	-0.00710639	0.695558	0.242943	1411
1416.11	-0.00794472	0.685548	0.242693	1412
1417.11	-0.00878936	0.675524	0.242722	1413
1418.1	-0.00971223	0.665596	0.24243	1414
1419.1	-0.010632	0.655559	0.242386	1415
1420.11	-0.0116717	0.645558	0.242129	1416
1421.11	-0.012847	0.63551	0.240854	1417
1422.11	-0.0140653	0.625505	0.2413	1418
1423.11	-0.0154523	0.615493	0.240759	1419
1424.11	-0.016773	0.605471	0.240876	1420
1425.11	-0.0181711	0.595485	0.240069	1421
1426.11	-0.0195561	0.585518	0.240461	1422
1427.1	-0.0209012	0.575638	0.240084	1423
1428.1	-0.0223125	0.565608	0.23956	1424
1429.12	-0.0238037	0.555475	0.238338	1425
1430.1	-0.0252146	0.545566	0.237617	1426
1431.11	-0.0267902	0.535561	0.237363	1427
1432.12	-0.0285209	0.525427	0.237603	1428
1433.11	-0.0300494	0.515575	0.235546	1429
1434.11	-0.0316437	0.505534	0.235178	1430
1435.11	-0.0328684	0.495516	0.234959	1431
1436.11	-0.0339322	0.485527	0.234147	1432
1437.11	-0.0345566	0.475476	0.233264	1433
1438.12	-0.0350265	0.465463	0.232584	1434
1439.12	-0.035374	0.455479	0.232964	1435
1440.1	-0.0356659	0.445609	0.2309	1436
1441.1	-0.0359489	0.435611	0.230152	1437
1442.1	-0.036222	0.425572	0.229175	1438
1443.11	-0.0364827	0.415566	0.228051	1439
1444.11	-0.0368219	0.405553	0.227385	1440
1445.11	-0.0370945	0.395498	0.226919	1441
1446.11	-0.0373951	0.385467	0.226058	1442
1447.11	-0.0377525	0.37546	0.224836	1443
1448.1	-0.0381446	0.365575	0.224444	1444
1449.1	-0.0385266	0.355577	0.223886	1445
1450.1	-0.0389291	0.345577	0.223467	1446
1451.1	-0.0393944	0.335539	0.222779	1447
1452.11	-0.0398761	0.325513	0.221328	1448
1453.11	-0.0403457	0.315503	0.220455	1449
1454.11	-0.0409569	0.305502	0.219981	1450
1455.11	-0.0414833	0.295513	0.218898	1451
1456.11	-0.0420227	0.285511	0.217539	1452
1457.11	-0.0425812	0.275455	0.218343	1453
1458.11	-0.0432027	0.265465	0.217284	1454
1459.12	-0.0438167	0.255424	0.216215	1455
1460.1	-0.0443886	0.245575	0.215235	1456
1461.1	-0.0450109	0.235595	0.214804	1457
1462.11	-0.0457135	0.225538	0.214359	1458
1463.11	-0.0463016	0.215523	0.213444	1459
1464.11	-0.0469381	0.205487	0.212334	1460
1465.11	-0.0476366	0.1955	0.212072	1461
1466.11	-0.0482929	0.185485	0.211298	1462
1467.11	-0.048933	0.17548	0.210665	1463
1468.11	-0.0495601	0.165507	0.209522	1464
1469.11	-0.0502214	0.155434	0.207879	1465
1470.11	-0.050965	0.145436	0.207766	1466
1471.12	-0.0516104	0.135444	0.206426	1467
1472.12	-0.0522531	0.125448	0.205518	1468
1473.1	-0.0531421	0.115635	0.205263	1469
1474.1	-0.0536202	0.105587	0.205023	1470
1475.1	-0.0542143	0.0955668	0.202593	1471
1476.1	-0.0548338	0.0855809	0.201612	1472
1477.1	-0.0555582	0.0755819	0.200431	1473
1478.1	-0.0560572	0.0655809	0.199809	1474
1479.12	-0.0565626	0.0554276	0.198739	1475
1480.11	-0.0570068	0.0455342	0.197863	1476
1481.11	-0.0574354	0.0355183	0.195416	1477
1482.11	-0.0577329	0.0255303	0.195394	1478
1483.11	-0.0581492	0.0155222	0.194509	1479
1484.11	-0.0585024	0.00554813	0.192437	1480
1485.11	-0.0588689	-0.00449789	0.191579	1481
1486.11	-0.0593311	-0.0144879	0.190337	1482
1487.11	-0.059798	-0.0244837	0.189063	1483
1488.13	-0.0605223	-0.0346519	0.188671	1484
1489.11	-0.0614402	-0.044494	0.186819	1485
1490.13	-0.061795	-0.0546387	0.185497	1486
1491.11	-0.0616364	-0.0644991	0.183802	1487
1492.11	-0.0615228	-0.074513	0.183163	1488
1493.11	-0.0613688	-0.0844938	0.181318	1489
1494.1	-0.0611739	-0.0943535	0.179485	1490
1495.12	-0.0609897	-0.10459	0.178531	1491
1496.1	-0.0608747	-0.114447	0.176665	1492
1497.11	-0.0608178	-0.124442	0.176377	1493
1498.11	-0.0604975	-0.134497	0.174053	1494
1499.11	-0.0603666	-0.144503	0.173541	1495
1500.11	-0.060287	-0.154511	0.171341	1496
1501.11	-0.0602214	-0.164493	0.17	1497
1502.11	-0.0601981	-0.174502	0.168567	1498
1503.11	-0.0601954	-0.184523	0.16705	1499
1504.13	-0.0602092	-0.194694	0.165799	1500
1505.11	-0.0602451	-0.204546	0.1644	1501
1506.11	-0.0603397	-0.214536	0.162677	1502
1507.11	-0.060371	-0.224534	0.160568	1503
1508.11	-0.0604444	-0.234526	0.159959	1504
1509.15	-0.0605369	-0.24487	0.157521	1505
1510.13	-0.0605999	-0.254713	0.155711	1506
1511.1	-0.0606294	-0.2644	0.155172	1507
1512.1	-0.0606962	-0.27441	0.15301	1508
1513.1	-0.0607362	-0.284454	0.151048	1509
1514.1	-0.0606179	-0.294405	0.148904	1510
1515.12	-0.0606735	-0.304605	0.147329	1511
1516.11	-0.0606512	-0.314471	0.14458	1512
1517.11	-0.0606857	-0.324478	0.145003	1513
1518.11	-0.0605797	-0.334486	0.142273	1514
1519.11	-0.0604862	-0.34448	0.140312	1515
1520.11	-0.060382	-0.354507	0.138105	1516
1521.11	-0.0602594	-0.364482	0.136547	1517
1522.11	-0.0601486	-0.374497	0.134803	1518
1523.12	-0.06001	-0.384527	0.132809	1519
1524.1	-0.0599009	-0.39439	0.131888	1520
1525.1	-0.0597959	-0.404423	0.129336	1521
1526.1	-0.0596854	-0.414411	0.127691	1522
1527.11	-0.0595109	-0.424455	0.126446	1523
1528.11	-0.0595177	-0.434452	0.124124	1524
1529.11	-0.05939	-0.444491	0.122083	1525
1530.11	-0.059264	-0.454459	0.120054	1526
1531.11	-0.0591472	-0.464486	0.118518	1527
1532.13	-0.059067	-0.474679	0.11734	1528
1533.1	-0.0589849	-0.484389	0.114967	1529
1534.12	-0.0588945	-0.494547	0.113046	1530
1535.12	-0.0587984	-0.504578	0.111201	1531
1536.12	-0.0587108	-0.514606	0.109615	1532
1537.12	-0.0586247	-0.524608	0.107998	1533
1538.12	-0.0585159	-0.53463	0.105857	1534
1539.12	-0.0583069	-0.544638	0.10397	1535
1540.14	-0.0581915	-0.554791	0.102605	1536
1541.12	-0.0581564	-0.564618	0.100086	1537
1542.14	-0.0579911	-0.574803	0.0978239	1538
1543.12	-0.0578091	-0.584643	0.0969406	1539
1544.12	-0.0576219	-0.594622	0.0947406	1540
1545.13	-0.0574151	-0.604658	0.0931003	1541
1546.13	-0.0572037	-0.614677	0.0909849	1542
1547.13	-0.0569867	-0.624687	0.0896126	1543
1548.13	-0.0567553	-0.634676	0.0881701	1544
1549.13	-0.0565319	-0.644696	0.0860955	1545
1550.12	-0.056297	-0.654568	0.0850455	1546
1551.12	-0.0560603	-0.664604	0.0829496	1547
1552.12	-0.055828	-0.6746	0.0809545	1548
1553.12	-0.0555369	-0.684644	0.0795349	1549
1554.12	-0.0552998	-0.69465	0.0776104	1550
1555.13	-0.0550302	-0.704662	0.0757427	1551
1556.14	-0.0547795	-0.714817	0.0740217	1552
1557.13	-0.0545003	-0.724647	0.0724269	1553
1558.14	-0.0542197	-0.734812	0.0704596	1554
1559.13	-0.053943	-0.744675	0.0689623	1555
1560.13	-0.0536513	-0.7547	0.0672499	1556
1561.12	-0.0533653	-0.764552	0.0647973	1557
1562.12	-0.0530597	-0.774548	0.0632995	1558
1563.12	-0.0527601	-0.784564	0.0623384	1559
1564.12	-0.0524391	-0.794604	0.059571	1560
1565.12	-0.0441482	-0.794832	0.0573456	1561
1566.12	-0.0364268	-0.784798	0.0571059	1562
1567.12	-0.0309995	-0.774771	0.0554244	1563
1568.12	-0.0267905	-0.764775	0.0544419	1564
1569.13	-0.0232703	-0.754713	0.0536859	1565
1570.13	-0.0202702	-0.744693	0.0523047	1566
1571.12	-0.01769	-0.734847	0.0526028	1567
1572.12	-0.015347	-0.724811	0.0517234	1568
1573.12	-0.0132436	-0.71483	0.0517572	1569
1574.12	-0.0113338	-0.704793	0.0514729	1570
1575.12	-0.00951083	-0.694783	0.0516909	1571
1576.12	-0.0078913	-0.684746	0.0517996	1572
1577.13	-0.0062967	-0.674738	0.0518173	1573
1578.13	-0.0047263	-0.66471	0.0529759	1574
1579.13	-0.00335677	-0.654694	0.0530712	1575
1580.12	-0.00197905	-0.644876	0.053425	1576
1581.12	-0.00062826	-0.634825	0.0531474	1577
1582.12	0.000741598	-0.624821	0.0550998	1578
1583.12	0.00202046	-0.614844	0.05512	1579
1584.14	0.00336117	-0.604625	0.0561971	1580
1585.13	0.00465298	-0.594742	0.0578435	1581
1586.13	0.00588626	-0.58476	0.057165	1582
1587.13	0.00712111	-0.574764	0.0587349	1583
1588.12	0.00839743	-0.564905	0.059396	1584
1589.13	0.00964245	-0.554708	0.0607648	1585
1590.12	0.0109065	-0.544854	0.0609664	1586
1591.12	0.0120805	-0.534814	0.0614463	1587
1592.12	0.0132644	-0.524853	0.0624795	1588
1593.12	0.0144676	-0.514817	0.0636236	1589
1594.13	0.0156954	-0.504797	0.065068	1590
1595.13	0.0169329	-0.494777	0.0671339	1591
1596.13	0.0180818	-0.484771	0.0685981	1592
1597.13	0.0193351	-0.474769	0.0698566	1593
1598.12	0.0204484	-0.464943	0.071532	1594
1599.12	0.0216008	-0.454904	0.0728134	1595
1600.12	0.0228422	-0.444905	0.0728596	1596
1601.12	0.024001	-0.434904	0.0758051	1597
1602.12	0.0252215	-0.424901	0.0771539	1598
1603.12	0.0264399	-0.414883	0.0787707	1599
1604.12	0.0276283	-0.404871	0.0800726	1600
1605.12	0.028833	-0.394852	0.0813983	1601
1606.13	0.0300651	-0.384806	0.0831218	1602
1607.13	0.0312869	-0.374775	0.085138	1603
1608.13	0.0325709	-0.364773	0.0864755	1604
1609.12	0.0338156	-0.354931	0.0884598	1605
1610.12	0.0351369	-0.344904	0.0905673	1606
1611.12	0.0364577	-0.334876	0.0916966	1607
1612.12	0.0378335	-0.324896	0.093719	1608
1613.12	0.039081	-0.314888	0.0951839	1609
1614.13	0.0405669	-0.304841	0.0978815	1610
1615.13	0.0418953	-0.294807	0.0996175	1611
1616.12	0.043285	-0.284937	0.101238	1612
1617.12	0.0445811	-0.274895	0.10329	1613
1618.12	0.0458135	-0.264901	0.105042	1614
1619.12	0.047114	-0.254867	0.108028	1615
1620.12	0.0482427	-0.24484	0.109424	1616
1621.12	0.0493026	-0.23484	0.112144	1617
1622.13	0.0503713	-0.224832	0.114141	1618
1623.13	0.0513026	-0.214779	0.116221	1619
1624.13	0.0522617	-0.204789	0.118338	1620
1625.13	0.0530682	-0.194754	0.120667	1621
1626.12	0.0539383	-0.184894	0.12345	1622
1627.12	0.0546505	-0.174887	0.125133	1623
1628.12	0.0556521	-0.16485	0.127066	1624
1629.12	0.0561857	-0.154846	0.129871	1625
1630.12	0.0569276	-0.144822	0.131165	1626
1631.12	0.05772	-0.134825	0.133402	1627
1632.12	0.0585145	-0.124818	0.136226	1628
1633.12	0.0592057	-0.114811	0.138217	1629
1634.13	0.0600796	-0.104751	0.140523	1630
1635.13	0.0608619	-0.0947259	0.14283	1631
1636.12	0.0617333	-0.0848803	0.144185	1632
1637.12	0.0626265	-0.0748349	0.146327	1633
1638.12	0.063685	-0.0648367	0.148366	1634
1639.14	0.0643911	-0.054692	0.149919	1635
1640.12	0.0650098	-0.0448154	0.15263	1636
1641.12	0.0657083	-0.034823	0.153541	1637
1642.12	0.0671674	-0.0247871	0.155861	1638
1643.12	0.0681773	-0.0147824	0.158008	1639
1644.12	0.0680534	-0.00479902	0.160231	1640
1645.12	0.0678215	0.00520255	0.162097	1641
1646.12	0.067742	0.0151977	0.163969	1642
1647.13	0.0677562	0.0251998	0.165986	1643
1648.13	0.0678376	0.0352237	0.167459	1644
1649.13	0.0679014	0.0452328	0.169189	1645
1650.13	0.0680219	0.0552434	0.171317	1646
1651.13	0.0681622	0.06525	0.173326	1647
1652.12	0.0681639	0.0751127	0.173933	1648
1653.12	0.068152	0.0851154	0.176211	1649
1654.12	0.0681407	0.0951415	0.177427	1650
1655.12	0.0680553	0.105131	0.179354	1651
1656.12	0.0679562	0.115163	0.181111	1652
1657.12	0.0676816	0.125163	0.182521	1653
1658.12	0.0675801	0.135161	0.183736	1654
1659.12	0.0674198	0.145162	0.185635	1655
1660.12	0.0672558	0.155182	0.186752	1656
1661.12	0.0670911	0.165198	0.188355	1657
1662.13	0.0669378	0.175267	0.188637	1658
1663.13	0.0669217	0.185246	0.190011	1659
1664.13	0.0667329	0.195257	0.191761	1660
1665.12	0.0666188	0.205132	0.193143	1661
1666.12	0.066488	0.215165	0.194374	1662
1667.13	0.0663622	0.22531	0.195748	1663
1668.12	0.0662803	0.235188	0.197124	1664
1669.12	0.0661827	0.24522	0.198239	1665
1670.12	0.0660649	0.255232	0.198091	1666
1671.12	0.0658727	0.265254	0.200168	1667
1672.12	0.0657699	0.275239	0.200151	1668
1673.12	0.0656966	0.28524	0.201297	1669
1674.13	0.065553	0.295253	0.201855	1670
1675.13	0.0654336	0.305257	0.202862	1671
1676.14	0.0653078	0.31543	0.203731	1672
1677.13	0.0651463	0.325284	0.205371	1673
1678.13	0.0649895	0.335303	0.206827	1674
1679.12	0.0648408	0.345156	0.207259	1675
1680.12	0.0646929	0.355144	0.207624	1676
1681.12	0.0645375	0.36516	0.20869	1677
1682.12	0.0643552	0.37518	0.209263	1678
1683.12	0.0641744	0.385164	0.210075	1679
1684.14	0.0640016	0.395352	0.211136	1680
1685.12	0.0638225	0.405174	0.212122	1681
1686.12	0.0636509	0.415217	0.21376	1682
1687.13	0.0634391	0.425217	0.21371	1683
1688.13	0.063378	0.435259	0.213593	1684
1689.13	0.0631287	0.445288	0.214825	1685
1690.13	0.0628408	0.455283	0.21578	1686
1691.13	0.06263	0.465277	0.216094	1687
1692.12	0.0624077	0.475173	0.217125	1688
1693.12	0.062183	0.485194	0.217985	1689
1694.12	0.06198	0.495219	0.21874	1690
1695.12	0.0617434	0.505216	0.218884	1691
1696.13	0.0614563	0.515279	0.220476	1692
1697.12	0.0611289	0.525261	0.220991	1693
1698.13	0.0606706	0.535307	0.221206	1694
1699.13	0.0600846	0.545301	0.222603	1695
1700.12	0.0592482	0.555158	0.222529	1696
1701.12	0.0583828	0.565186	0.223522	1697
1702.12	0.0574058	0.575165	0.224294	1698
1703.12	0.0563363	0.585232	0.224061	1699
1704.12	0.0552674	0.595235	0.225588	1700
1705.13	0.0542143	0.605258	0.226676	1701
1706.13	0.0531523	0.615296	0.226577	1702
1707.12	0.0519614	0.62519	0.227642	1703
1708.12	0.0506537	0.635194	0.227874	1704
1709.12	0.0493793	0.645201	0.228807	1705
1710.12	0.0480135	0.655232	0.229473	1706
1711.13	0.046581	0.665259	0.229747	1707
1712.13	0.0452028	0.675297	0.230905	1708
1713.12	0.0437449	0.685173	0.232392	1709
1714.12	0.0424739	0.695144	0.232381	1710
1715.12	0.0411627	0.705175	0.233155	1711
1716.12	0.0398427	0.715188	0.232218	1712
1717.12	0.0386146	0.725244	0.233278	1713
1718.12	0.0373806	0.735234	0.234527	1714
1719.12	0.0361947	0.74525	0.234474	1715
1720.14	0.0350374	0.755452	0.234566	1716
1721.13	0.0339395	0.765303	0.235636	1717
1722.13	0.0328364	0.775323	0.235237	1718
1723.15	0.0317817	0.785523	0.236248	1719
1724.13	0.0307904	0.795366	0.236662	1720
1725.13	0.0297694	0.805364	0.237382	1721
1726.14	0.0288368	0.815381	0.238066	1722
1727.14	0.0279167	0.825409	0.236893	1723
1728.14	0.0270149	0.835424	0.237746	1724
1729.14	0.0261121	0.845439	0.238512	1725
1730.16	0.0252585	0.855582	0.237882	1726
1731.14	0.0244316	0.86546	0.238689	1727
1732.16	0.023626	0.875595	0.239443	1728
1733.14	0.0228638	0.885453	0.239433	1729
1734.14	0.0221136	0.895467	0.239669	1730
1735.14	0.021375	0.905464	0.240031	1731
1736.14	0.020685	0.915478	0.240235	1732
1737.14	0.020015	0.925492	0.240871	1733
1738.13	0.0193725	0.935358	0.240732	1734
1739.13	0.0187533	0.945367	0.240282	1735
1740.13	0.018161	0.955379	0.240168	1736
1741.13	0.0175793	0.965394	0.240535	1737
1742.13	0.0170302	0.975386	0.240513	1738
1743.15	0.0164956	0.985558	0.241523	1739
1744.14	0.0159912	0.995419	0.240945	1740
1745.14	0.0139783	0.995111	0.241755	1741
1746.14	0.0122061	0.985086	0.241497	1742
1747.14	0.0108756	0.975085	0.241994	1743
1748.14	0.00978004	0.965075	0.241271	1744
1749.14	0.0088261	0.955097	0.241982	1745
1750.14	0.00799536	0.945038	0.241777	1746
1751.14	0.00724408	0.93504	0.240955	1747
1752.13	0.00655707	0.925207	0.241579	1748
1753.13	0.00592049	0.915148	0.24141	1749
1754.13	0.00532518	0.905173	0.241747	1750
1755.14	0.00475853	0.895155	0.241593	1751
1756.14	0.00417891	0.885119	0.240808	1752
1757.14	0.0036642	0.875129	0.241626	1753
1758.14	0.00315802	0.865091	0.241189	1754
1759.14	0.00266588	0.855062	0.241207	1755
1760.16	0.00214537	0.8449	0.242103	1756
1761.14	0.0016789	0.835068	0.241575	1757
1762.14	0.00119024	0.825044	0.241729	1758
1763.16	0.000694958	0.814886	0.241825	1759
1764.14	0.000204707	0.805012	0.241896	1760
1765.13	-0.000302341	0.795155	0.241969	1761
1766.13	-0.00081426	0.785121	0.242119	1762
1767.13	-0.00134357	0.775131	0.241599	1763
1768.13	-0.00188858	0.765133	0.242198	1764
1769.14	-0.00247602	0.755119	0.241643	1765
1770.14	-0.0030714	0.745128	0.241472	1766
1771.14	-0.00368933	0.735135	0.241124	1767
1772.16	-0.00435254	0.724954	0.241759	1768
1773.14	-0.00507476	0.715082	0.241709	1769
1774.14	-0.00576865	0.705074	0.241458	1770
1775.14	-0.00651543	0.69505	0.240225	1771
1776.14	-0.00731045	0.685013	0.240289	1772
1777.15	-0.00817023	0.674967	0.239956	1773
1778.14	-0.00903854	0.665072	0.240599	1774
1779.14	-0.00999842	0.655046	0.2406	1775
1780.14	-0.0110451	0.645026	0.239467	1776
1781.14	-0.0121312	0.635007	0.240208	1777
1782.15	-0.0133183	0.624959	0.240627	1778
1783.13	-0.0146274	0.615124	0.239372	1779
1784.13	-0.0159896	0.605125	0.23983	1780
1785.13	-0.017325	0.595116	0.239384	1781
1786.13	-0.0187093	0.58511	0.239288	1782
1787.13	-0.0200614	0.575134	0.237901	1783
1788.13	-0.0215157	0.565113	0.238539	1784
1789.14	-0.0228611	0.555094	0.237406	1785
1790.14	-0.024406	0.545064	0.235826	1786
1791.14	-0.0258765	0.535079	0.236518	1787
1792.14	-0.0275297	0.525055	0.23499	1788
1793.14	-0.0293518	0.515037	0.235085	1789
1794.15	-0.030757	0.50499	0.233015	1790
1795.15	-0.0321393	0.494977	0.233463	1791
1796.13	-0.0330742	0.48516	0.233247	1792
1797.13	-0.0338196	0.475155	0.233483	1793
1798.13	-0.0344656	0.465154	0.231335	1794
1799.15	-0.0348762	0.454993	0.230245	1795
1800.13	-0.035234	0.445111	0.229443	1796
1801.13	-0.0355829	0.435126	0.229744	1797
1802.14	-0.0359222	0.425084	0.227829	1798
1803.14	-0.0362295	0.415103	0.228114	1799
1804.15	-0.0365794	0.404892	0.22714	1800
1805.14	-0.0368866	0.395038	0.225466	1801
1806.14	-0.0372977	0.384994	0.225171	1802
1807.14	-0.0376344	0.375017	0.224158	1803
1808.14	-0.0380073	0.364999	0.223443	1804
1809.15	-0.0384264	0.354965	0.222488	1805
1810.13	-0.0388359	0.345086	0.222023	1806
1811.14	-0.0393543	0.33507	0.221444	1807
1812.14	-0.039803	0.325059	0.221336	1808
1813.14	-0.040293	0.315027	0.219326	1809
1814.14	-0.0407881	0.305016	0.219441	1810
1815.14	-0.0413936	0.29504	0.218378	1811
1816.14	-0.0419065	0.284963	0.217703	1812
1817.14	-0.0424339	0.274994	0.215992	1813
1818.15	-0.0430365	0.264975	0.215894	1814
1819.13	-0.0436148	0.255127	0.214953	1815
1820.13	-0.0442008	0.245113	0.2145	1816
1821.14	-0.0447896	0.235093	0.214037	1817
1822.14	-0.0454057	0.225084	0.212919	1818
1823.14	-0.0460227	0.215045	0.212366	1819
1824.14	-0.0466163	0.205027	0.211572	1820
1825.14	-0.047332	0.194991	0.209807	1821
1826.15	-0.0479273	0.184955	0.210071	1822
1827.13	-0.0486678	0.175115	0.209054	1823
1828.13	-0.0491986	0.165073	0.208003	1824
1829.14	-0.0498114	0.155043	0.206602	1825
1830.14	-0.0505576	0.145028	0.205813	1826
1831.14	-0.0511469	0.135064	0.20599	1827
1832.14	-0.0517925	0.125008	0.204353	1828
1833.14	-0.052439	0.115023	0.203198	1829
1834.14	-0.0531196	0.105007	0.202695	1830
1835.14	-0.0537445	0.0950075	0.201805	1831
1836.14	-0.0544599	0.0849964	0.200098	1832
1837.14	-0.0549854	0.0749626	0.199406	1833
1838.15	-0.055657	0.0649734	0.199149	1834
1839.13	-0.0560717	0.0551299	0.196662	1835
1840.13	-0.0564819	0.0451086	0.196364	1836
1841.15	-0.0569089	0.0349667	0.195592	1837
1842.13	-0.0572765	0.0251089	0.193581	1838
1843.15	-0.0576427	0.0149388	0.192948	1839
1844.14	-0.0580585	0.00505483	0.191985	1840
1845.14	-0.0584796	-0.00495561	0.190546	1841
1846.14	-0.0587806	-0.0149756	0.188428	1842
1847.14	-0.0592418	-0.0249798	0.187655	1843
1848.15	-0.0601147	-0.0350205	0.186674	1844
1849.15	-0.060976	-0.0450282	0.185799	1845
1850.13	-0.0613859	-0.0548789	0.183805	1846
1851.13	-0.0611803	-0.0648923	0.182924	1847
1852.13	-0.0609143	-0.0749144	0.181366	1848
1853.13	-0.0607126	-0.0849118	0.179737	1849
1854.14	-0.0605091	-0.0949475	0.179538	1850
1855.14	-0.0604288	-0.10496	0.177164	1851
1856.14	-0.0602057	-0.114945	0.176023	1852
1857.14	-0.0600227	-0.124947	0.175459	1853
1858.16	-0.0598328	-0.135119	0.17325	1854
1859.14	-0.0596941	-0.144992	0.170938	1855
1860.14	-0.0595749	-0.154982	0.170334	1856
1861.15	-0.0593506	-0.165016	0.16898	1857
1862.13	-0.0595554	-0.174879	0.167053	1858
1863.13	-0.059517	-0.184905	0.165873	1859
1864.13	-0.0595162	-0.194897	0.164319	1860
1865.13	-0.0595385	-0.204901	0.162962	1861
1866.13	-0.0595824	-0.214906	0.161732	1862
1867.14	-0.0596133	-0.224975	0.15996	1863
1868.14	-0.0597228	-0.23494	0.158936	1864
1869.14	-0.0597678	-0.244934	0.157122	1865
1870.14	-0.0598331	-0.254974	0.155556	1866
1871.14	-0.0598849	-0.264969	0.153856	1867
1872.14	-0.059921	-0.275057	0.152104	1868
1873.14	-0.0599063	-0.285025	0.150002	1869
1874.15	-0.0598719	-0.295015	0.148522	1870
1875.13	-0.0599256	-0.304895	0.146288	1871
1876.14	-0.0597805	-0.314956	0.14443	1872
1877.14	-0.0597388	-0.324939	0.143888	1873
1878.14	-0.0596755	-0.334921	0.141385	1874
1879.14	-0.0595801	-0.344929	0.140248	1875
1880.16	-0.0595028	-0.355142	0.137415	1876
1881.14	-0.0593695	-0.364983	0.135602	1877
1882.14	-0.0592209	-0.374998	0.134625	1878
1883.15	-0.0590998	-0.385022	0.133088	1879
1884.13	-0.0589045	-0.394898	0.130644	1880
1885.14	-0.0587511	-0.4049	0.129583	1881
1886.14	-0.0586944	-0.414912	0.128831	1882
1887.14	-0.0586019	-0.424953	0.125605	1883
1888.16	-0.0584783	-0.435126	0.124116	1884
1889.14	-0.0584013	-0.445033	0.12189	1885
1890.15	-0.0582728	-0.45504	0.11999	1886
1891.13	-0.0583311	-0.464911	0.118939	1887
1892.13	-0.0581354	-0.474912	0.116403	1888
1893.14	-0.0579959	-0.484923	0.114082	1889
1894.14	-0.0579277	-0.494939	0.112109	1890
1895.14	-0.0578699	-0.504971	0.110695	1891
1896.14	-0.0577887	-0.514963	0.108596	1892
1897.14	-0.0576795	-0.524996	0.106872	1893
1898.14	-0.0575792	-0.535036	0.105592	1894
1899.14	-0.0574964	-0.545024	0.102644	1895
1900.15	-0.0573651	-0.555032	0.100953	1896
1901.15	-0.0571651	-0.565012	0.0992451	1897
1902.13	-0.0570655	-0.574852	0.0977187	1898
1903.16	-0.0568597	-0.585173	0.095464	1899
1904.13	-0.0567101	-0.594891	0.0949503	1900
1905.13	-0.0565438	-0.604901	0.0935233	1901
1906.13	-0.0563542	-0.614939	0.0918412	1902
1907.13	-0.056144	-0.624949	0.0903886	1903
1908.14	-0.0559266	-0.634955	0.088128	1904
1909.14	-0.0557014	-0.644963	0.0866797	1905
1910.14	-0.0554653	-0.654991	0.0843076	1906
1911.14	-0.0552522	-0.664999	0.0827218	1907
1912.15	-0.0550415	-0.675011	0.0809136	1908
1913.13	-0.0548108	-0.684892	0.0794636	1909
1914.13	-0.0545716	-0.694912	0.0774204	1910
1915.14	-0.0543124	-0.704949	0.0757318	1911
1916.14	-0.0540287	-0.71496	0.074437	1912
1917.14	-0.0537483	-0.724977	0.072909	1913
1918.14	-0.0534797	-0.734984	0.0720333	1914
1919.14	-0.053218	-0.744976	0.0692349	1915
1920.14	-0.0529408	-0.754988	0.0676491	1916
1921.14	-0.0526434	-0.764993	0.0660243	1917
1922.16	-0.0523751	-0.775162	0.0646473	1918
1923.14	-0.0521114	-0.784988	0.0629981	1919
1924.15	-0.0518108	-0.795034	0.0612117	1920
1925.15	-0.0434361	-0.79435	0.0598244	1921
1926.13	-0.0361744	-0.78452	0.0576652	1922
1927.15	-0.0308776	-0.774309	0.0548348	1923
1928.14	-0.0268756	-0.764473	0.0536955	1924
1929.14	-0.0234388	-0.754436	0.0541011	1925
1930.16	-0.0204789	-0.744245	0.0536865	1926
1931.14	-0.0179824	-0.734402	0.0537209	1927
1932.14	-0.0157057	-0.724366	0.0537986	1928
1933.14	-0.0136598	-0.714395	0.0533888	1929
1934.14	-0.011836	-0.704379	0.05278	1930
1935.15	-0.0100919	-0.694346	0.0536421	1931
1936.13	-0.00847141	-0.684496	0.0532636	1932
1937.13	-0.00695416	-0.674507	0.0526733	1933
1938.14	-0.00548361	-0.664477	0.0526685	1934
1939.14	-0.00402688	-0.65442	0.0539045	1935
1940.14	-0.00266883	-0.644414	0.0546133	1936
1941.14	-0.0013309	-0.634419	0.0545237	1937
1942.14	-6.21174e-05	-0.624407	0.0552364	1938
1943.14	0.00123794	-0.61438	0.0555727	1939
1944.15	0.00252092	-0.604376	0.0567963	1940
1945.13	0.00369615	-0.594526	0.0566386	1941
1946.13	0.00496314	-0.584526	0.0577345	1942
1947.15	0.00615731	-0.574372	0.0578665	1943
1948.13	0.00734043	-0.564501	0.0594171	1944
1949.14	0.0086201	-0.554528	0.0603472	1945
1950.14	0.00976211	-0.54449	0.0607168	1946
1951.14	0.0110208	-0.534455	0.0622148	1947
1952.14	0.0121299	-0.524481	0.0631553	1948
1953.14	0.0133743	-0.514408	0.0637757	1949
1954.13	0.0144642	-0.504533	0.065816	1950
1955.13	0.0157196	-0.494545	0.0655402	1951
1956.13	0.0167598	-0.484529	0.0676724	1952
1957.13	0.017974	-0.474542	0.0693139	1953
1958.13	0.0190883	-0.464561	0.0704167	1954
1959.14	0.0202338	-0.454548	0.071766	1955
1960.14	0.0213819	-0.444488	0.072824	1956
1961.14	0.0225809	-0.434504	0.0746578	1957
1962.14	0.023722	-0.424496	0.0759422	1958
1963.14	0.0249819	-0.414456	0.0773189	1959
1964.14	0.0260728	-0.404454	0.0774422	1960
1965.15	0.0272885	-0.394416	0.0798366	1961
1966.13	0.0284081	-0.384551	0.0820572	1962
1967.14	0.0296624	-0.374536	0.0834133	1963
1968.14	0.030856	-0.364521	0.0847049	1964
1969.14	0.0321921	-0.354492	0.0866492	1965
1970.14	0.0334444	-0.344473	0.0881248	1966
1971.14	0.0349318	-0.334469	0.0897406	1967
1972.16	0.0361332	-0.324296	0.091655	1968
1973.14	0.0374124	-0.31447	0.0932267	1969
1974.14	0.0388123	-0.304447	0.0956021	1970
1975.13	0.0401604	-0.294528	0.0973826	1971
1976.15	0.0414529	-0.284385	0.0987314	1972
1977.14	0.0427971	-0.274527	0.100707	1973
1978.14	0.0440117	-0.26453	0.103309	1974
1979.14	0.0452954	-0.254524	0.105126	1975
1980.16	0.0463879	-0.244355	0.107172	1976
1981.14	0.0474366	-0.234498	0.109796	1977
1982.14	0.0485639	-0.224493	0.111239	1978
1983.14	0.0494753	-0.214475	0.113674	1979
1984.15	0.0503966	-0.20443	0.115378	1980
1985.16	0.0513664	-0.194251	0.117231	1981
1986.13	0.0521023	-0.184545	0.119919	1982
1987.13	0.0529763	-0.174552	0.121411	1983
1988.13	0.0536816	-0.164536	0.123892	1984
1989.14	0.0544694	-0.15454	0.126476	1985
1990.14	0.0551989	-0.144529	0.128118	1986
1991.14	0.0560355	-0.134528	0.13038	1987
1992.14	0.0567996	-0.124516	0.132258	1988
1993.14	0.0576086	-0.114466	0.134406	1989
1994.14	0.0584734	-0.104467	0.137001	1990
1995.14	0.0593445	-0.0944515	0.138973	1991
1996.14	0.0603117	-0.084444	0.141207	1992
1997.14	0.061369	-0.0744204	0.143022	1993
1998.14	0.0623109	-0.064412	0.145662	1994
1999.14	0.0632319	-0.0544408	0.146736	1995
2000.14	0.0637802	-0.0444147	0.148875	1996
2001.14	0.0645281	-0.03443	0.150301	1997
2002.13	0.0661725	-0.0245661	0.151933	1998
2003.13	0.0671532	-0.0145696	0.154994	1999
[truncated: 2,600 more rows]
